# Supplementary material for: Discovery of unguisin J, a new cyclic peptide from Aspergillus heteromorphus CBS 117.55, and phylogeny-based bioinformatic analysis of UngA NRPS domains
Source: publisher site journal article supplement (doi:10.3762/bjoc.20.32), 2024-02-19
Supplement: Additional file 1 [file 1860-5397-20-32-S1.pdf]

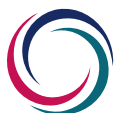

## Supporting Information

for

### **Discovery of unguisin J, a new cyclic peptide from *Aspergillus heteromorphus* CBS 117.55, and phylogeny-based bioinformatic analysis of UngA NRPS domains**

Sharmila Neupane, Marcelo Rodrigues de Amorim and Elizabeth Skellam

*Beilstein J. Org. Chem.* **2024**, *20*, 321–330. [doi:10.3762/bjoc.20.32](https://doi.org/10.3762/bjoc.20.32)

### **Spectroscopic and spectrometric data of 1 and 2. Bioinformatic data of the biosynthetic gene clusters**

## Table of Contents

### List of supplementary tables:

|                                                                                                                                                                                                                                           |     |
|-------------------------------------------------------------------------------------------------------------------------------------------------------------------------------------------------------------------------------------------|-----|
| <b>Table 1S:</b> DNA and protein sequences of ung” BGC mined from <i>A. heteromorphus</i> CBS 117.55. ....                                                                                                                                | S3  |
| <b>Table 2S:</b> <sup>1</sup> H and <sup>13</sup> C NMR data for <b>2</b> ( <sup>1</sup> H: 500MHz, <sup>13</sup> C:125MHz; DMSO- <i>d</i> <sub>6</sub> ). ....                                                                           | S46 |
| <b>Table 3S:</b> Summary of additional NRPS identified in the genome of <i>A. heteromorphus</i> CBS 117.55. Abbreviations as main text: C <sub>T</sub> = cyclizing C domain; X = undefined region after CDS analysis; R = reductase. .... | S47 |

### List of supplementary figures:

|                                                                                                                                                           |     |
|-----------------------------------------------------------------------------------------------------------------------------------------------------------|-----|
| <b>Figure S1:</b> A domain sequence alignment comparing UngA, UngA', and UngA". ....                                                                      | S13 |
| <b>Figure S2:</b> C domain sequence alignment comparing UngA, UngA', and UngA". ....                                                                      | S13 |
| <b>Figure S3:</b> A domain AMP binding motif identified in extracted A domains. ....                                                                      | S13 |
| <b>Figure S4:</b> C domain active site identified in extracted C domains. ....                                                                            | S14 |
| <b>Figure S5:</b> <sup>1</sup> H NMR spectrum of <b>1</b> (500 MHz, DMSO- <i>d</i> <sub>6</sub> ). ....                                                   | S15 |
| <b>Figure S6:</b> Expansion of the <sup>1</sup> H NMR spectrum of <b>1</b> (500 MHz, DMSO- <i>d</i> <sub>6</sub> ). ....                                  | S16 |
| <b>Figure S7:</b> Expansion of the <sup>1</sup> H NMR spectrum of <b>1</b> (500 MHz, DMSO- <i>d</i> <sub>6</sub> ). ....                                  | S17 |
| <b>Figure S8:</b> Expansion of the <sup>1</sup> H NMR spectrum of <b>1</b> (500 MHz, DMSO- <i>d</i> <sub>6</sub> ). ....                                  | S18 |
| <b>Figure S9:</b> <sup>13</sup> C NMR spectrum of <b>1</b> (125 MHz, DMSO- <i>d</i> <sub>6</sub> ). ....                                                  | S19 |
| <b>Figure S10:</b> gHSQC spectrum of <b>1</b> ( <sup>1</sup> H:500 MHz; <sup>13</sup> C:125 MHz, DMSO- <i>d</i> <sub>6</sub> ). ....                      | S20 |
| <b>Figure S11:</b> gHMBC spectrum of <b>1</b> ( <sup>1</sup> H:500 MHz; <sup>13</sup> C:125 MHz, DMSO- <i>d</i> <sub>6</sub> ). ....                      | S21 |
| <b>Figure S12:</b> gCOSY spectrum of <b>1</b> (500 MHz, DMSO- <i>d</i> <sub>6</sub> ). ....                                                               | S22 |
| <b>Figure S13:</b> 2D-NOESY spectrum of <b>1</b> (500 MHz, DMSO- <i>d</i> <sub>6</sub> ). ....                                                            | S23 |
| <b>Figure S14:</b> HRESIMS spectrum of <b>1</b> in positive ionization mode. ....                                                                         | S24 |
| <b>Figure S15:</b> HRESIMS/MS spectra of <b>1</b> and fragmentation patterns in positive ionization mode. ....                                            | S25 |
| <b>Figure S16:</b> UV spectrum (photodiode array, H <sub>2</sub> O:MeCN) of <b>1</b> . ....                                                               | S26 |
| <b>Figure S17:</b> HPLC-PDA chromatogram of unguisin J ( <b>1</b> ). ....                                                                                 | S27 |
| <b>Figure S18:</b> <sup>1</sup> H NMR spectrum of <b>2</b> (500 MHz, DMSO- <i>d</i> <sub>6</sub> ). ....                                                  | S28 |
| <b>Figure S19:</b> Expansion of the <sup>1</sup> H NMR spectrum of <b>2</b> (500 MHz, DMSO- <i>d</i> <sub>6</sub> ). ....                                 | S29 |
| <b>Figure S20:</b> Expansion of the <sup>1</sup> H NMR spectrum of <b>2</b> (500 MHz, DMSO- <i>d</i> <sub>6</sub> ). ....                                 | S30 |
| <b>Figure S21:</b> Expansion of the <sup>1</sup> H NMR spectrum of <b>2</b> (500 MHz, DMSO- <i>d</i> <sub>6</sub> ). ....                                 | S31 |
| <b>Figure S22:</b> <sup>13</sup> C NMR spectrum of <b>2</b> (125 MHz, DMSO- <i>d</i> <sub>6</sub> ). ....                                                 | S32 |
| <b>Figure S23:</b> gHSQC NMR spectrum of <b>2</b> ( <sup>1</sup> H:500 MHz; <sup>13</sup> C:125 MHz, DMSO- <i>d</i> <sub>6</sub> ). ....                  | S33 |
| <b>Figure S24:</b> Expansion of the gHSQC NMR spectrum of <b>2</b> ( <sup>1</sup> H:500 MHz; <sup>13</sup> C:125 MHz, DMSO- <i>d</i> <sub>6</sub> ). .... | S34 |
| <b>Figure S25:</b> UV spectrum (photodiode array, H <sub>2</sub> O:MeCN) of <b>2</b> . ....                                                               | S35 |
| <b>Figure S26:</b> HRESIMS spectrum of <b>2</b> in positive ionization mode. ....                                                                         | S36 |

|                                                                                                                                                                                                                  |     |
|------------------------------------------------------------------------------------------------------------------------------------------------------------------------------------------------------------------|-----|
| <b>Figure S27:</b> HPLC-PDA chromatogram of unguisin B ( <b>2</b> ).....                                                                                                                                         | S37 |
| <b>Figure S28:</b> HPLC-PDA chromatogram of soluble-organic extract from rice culture of <i>A. heteromorphus</i> . Peak labels represent unguisin J ( <b>1</b> ) and Unguisin B ( <b>2</b> ).....                | S38 |
| <b>Figure S29:</b> LC-MS analysis of <i>N</i> <sup>α</sup> -(5-fluoro-2,4-dinitrophenyl)-D-leucinamide derivatives of the hydrolysates of <b>1</b> and <b>2</b> as well as the alanine amino acid standards..... | S39 |
| <b>Figure S30:</b> LC-MS analysis of <i>N</i> <sup>α</sup> -(5-fluoro-2,4-dinitrophenyl)-D-leucinamide derivatives of the hydrolysates of <b>1</b> and <b>2</b> as well as the valine amino acid standards.....  | S40 |
| <b>Figure S31:</b> LC-MS analysis of <i>N</i> <sup>α</sup> -(5-fluoro-2,4-dinitrophenyl)-D-leucinamide derivatives of the hydrolysates of <b>1</b> and <b>2</b> as well as the leucine amino acid standards..... | S41 |
| <b>Figure S32:</b> LC-MS analysis of <i>N</i> <sup>α</sup> -(5-fluoro-2,4-dinitrophenyl)-D-leucinamide derivative of the hydrolysate of <b>1</b> as well as the phenylalanine amino acid standards.....          | S42 |
| <b>Figure S33:</b> LC-MS analysis of <i>N</i> <sup>α</sup> -(5-fluoro-2,4-dinitrophenyl)-D-leucinamide derivatives of the hydrolysates of <b>1</b> and <b>2</b> as well as the D-tryptophan standard. ....       | S43 |
| <b>Figure S34:</b> Colonies of <i>Aspergillus heteromorphous</i> CBS 117.55 with 7 days of growth at 25 °C. Colonies on DPY agar plate verse ( <b>A</b> ) and obverse ( <b>B</b> ).....                          | S44 |
| <b>Figure S35:</b> Colonies of <i>Aspergillus heteromorphous</i> CBS 117.55 with 21 days of growth at 25 °C on solid rice in Erlenmeyer flasks. ....                                                             | S45 |

**Table S1:** DNA and protein sequences of ung” BGC mined from *A. heteromorphus* CBS 117.55.

| Gene  | Putative DNA sequence                                                                                                                                                                                                                                                                                                                                                                                                                                                                                                                                                                                                                                                                                                                                                                                                                                                                                                                                                                                                                                                                                                                                                                                                                                                                                                                                                                                                                                                                                                                                                                                                                                                                                                                                                                                                                                                                                                                                                                                                                                                                                                                                                                                                                                                                                                                                                                                                                                                                                                                                                                                                                                                                                                                                                                                                                                                                                                                                                                                                                                                                                                                                                                                                                                                                                                                                                                                                                                                                                                                                                                                                                                                                                                  | Predicted protein sequence                                                                                                                                                                                                                                                                                                                                                                                                                                                                                                                                                                                                                                                                                                                                                                                                                                                                                                                                                                                                                                                                                                                                                                                                                                                                                                                                                                                                                                                               |
|-------|------------------------------------------------------------------------------------------------------------------------------------------------------------------------------------------------------------------------------------------------------------------------------------------------------------------------------------------------------------------------------------------------------------------------------------------------------------------------------------------------------------------------------------------------------------------------------------------------------------------------------------------------------------------------------------------------------------------------------------------------------------------------------------------------------------------------------------------------------------------------------------------------------------------------------------------------------------------------------------------------------------------------------------------------------------------------------------------------------------------------------------------------------------------------------------------------------------------------------------------------------------------------------------------------------------------------------------------------------------------------------------------------------------------------------------------------------------------------------------------------------------------------------------------------------------------------------------------------------------------------------------------------------------------------------------------------------------------------------------------------------------------------------------------------------------------------------------------------------------------------------------------------------------------------------------------------------------------------------------------------------------------------------------------------------------------------------------------------------------------------------------------------------------------------------------------------------------------------------------------------------------------------------------------------------------------------------------------------------------------------------------------------------------------------------------------------------------------------------------------------------------------------------------------------------------------------------------------------------------------------------------------------------------------------------------------------------------------------------------------------------------------------------------------------------------------------------------------------------------------------------------------------------------------------------------------------------------------------------------------------------------------------------------------------------------------------------------------------------------------------------------------------------------------------------------------------------------------------------------------------------------------------------------------------------------------------------------------------------------------------------------------------------------------------------------------------------------------------------------------------------------------------------------------------------------------------------------------------------------------------------------------------------------------------------------------------------------------------|------------------------------------------------------------------------------------------------------------------------------------------------------------------------------------------------------------------------------------------------------------------------------------------------------------------------------------------------------------------------------------------------------------------------------------------------------------------------------------------------------------------------------------------------------------------------------------------------------------------------------------------------------------------------------------------------------------------------------------------------------------------------------------------------------------------------------------------------------------------------------------------------------------------------------------------------------------------------------------------------------------------------------------------------------------------------------------------------------------------------------------------------------------------------------------------------------------------------------------------------------------------------------------------------------------------------------------------------------------------------------------------------------------------------------------------------------------------------------------------|
| ungA” | <p>ATGCCGACAGAGAATGGGGAGGTCCAGCACCGGATCGACGGCCTTCAGGATCAGGATACTGTGGAGATATTGCTGGTTACCTTGAATC<br/> ATGGGCCCTGCAGGCTGTGGAGGAGTTCAAAGCCAGCAAGGGCATGCTCGAGATAGGCAGCGTGAGCGACAGATCGAACGATGCCCC<br/> TAAGGTGAAGATTGAGCTAGATGGGGAACTGAGAATATATTGGCGCAATTGCGAGGGGAATGGGTGCGCCAGCTGGTGCACCAGCAC<br/> CACGAAGCAGCCAGTAATTTTGGCGCTCCATAATTTGGATGGCAGCCAGAGAGGCTGCTGGTCTTGGGTTATGGAAAGGAGGG<br/> AAGCCTGGGTGTCGGAGGAGGCGCCTAAGAGCTGGTCCAGGAAAGGAGGTGTGCACCCTTCTAGAGATGCATTGCCAGGCTCGCC<br/> CAGAAGAGCTGCAATTCATATCGTCTCGCCTCCTCTGTTGCGGCGCAAGCATTGTGCAGCACCTGGATTTGCGGATCCGACAGTCCA<br/> TTTCCAATCGCAGTCTCGCAGACGTGCCGGTAGAGACTGTGCCCTGCCGCTCGGACAGCGAGCTCAGGGCCATCTGGGGCTGGAATGG<br/> CACGCTTCTGAGGGAGTGCAGAGATGCGTTACAGATATCATCGCCAGCAGGCGGACTGCGGCGCACACGCGCCAGCAGTCTCGCCT<br/> GGGACGCGAGCTGGACTATCAGCAACTGGATCGGATCTCCACTCGATTGGCCATTACTGGTGCGAGCTGGGTGCTGCGCCAGATGAT<br/> ATCATCCCCCTGCTTCGAGAAGTCCAAGTGGATGATGGTGGCCATTCTGGCCGTGATGAAGTCAGGGGCTGTATCGCTGCCCTGGAC<br/> CCGACACAGCCGAGGATCGCCTGCGAAGCATTGTGAAGCAGCTGCAGCCAGCTGGATTCTGACATCGCCGCCAGATCGAAGTGG<br/> CCGACGCTCGAGATCAGCAATGTCATCGTCTCGACGAAGCGCCCTACGGCAACTGCCAGACTCGAAGGAAGACATCTCCATGC<br/> GTTGATCCCTCCGTAACCTGTACATTGTTTTACGTGCGGCAGCACTGGAACGCCAAGGGAGTTCATGATCAATCACACCAACTTTAGC<br/> AGCGCCATCGCCTACCAGCATGAGGCATTGGGGATGGATAACCCGCGGAGTGTTCGACTTCGCTTCATACGCCTTTGATCTGGCCTGG<br/> GGGAACATCATCCATACCTCGCGGCGGGGGGTGCTATGCATCCCAAGTGAAGTGAGCGCCGTGGAACATCGCCGAGGCAATCC<br/> GCAGACTTGGGGTGAACCATCTCCAGCTGACCCCCAGTGTGCTCGCCTCATCGATCCGCGAGATATCCCCGAGTGCATGGATCCTCC<br/> TGATCGGAGAGCCAATGACCCAGGCGGATGTTGCTCAATGGAGCCATACTGCAAATGATCAATTCCTACGGCCAGCGGAATGCACG<br/> GTGGCGGTGACCTCCAGACAATCCCCACGGCCGACCTTGGGACTCGAGTATGGGAAAGGCGTGCAGTGCAGTACCTGGATCGTTG<br/> ACGAGGAGCATGGGGAGACACTGGTCCCCCTTGGCCACACAGCGGAGTGTGGCTGGAAGGACCGCTGGTGGCCAGGGATATCTAG<br/> GAGACTGGAGAAGAGCGCGGAGTTTCATCGATAGCCCTGCCTGGCTGACCCGGGAATACCAGGGGTGCTCCCGCGCCGCGAG<br/> GCCGACTATATAAAACTAGAGATCTGGTGCCTACAACCCGACGGCTCGCTGGTTTACGTGGCTCGCAAGGATACGCAGATCAAGATCC<br/> GGGGCCAGCGGTGGAACCTGGGCGATGTGAATATCACTGAAGCTTGCAGTCCCGACAAGATTCATCTGTTGCAGCCGAGGCCAT<br/> CACCCCGCGGGGTAGCAGCAGCACCATCCTCGTCGATACCTGGCCCTCGGCGAAGAAGCAACTGGCGCCGCGGAGAGCACCCGGGA<br/> GAGTCTAGCCAGTTGCCTGCATGGGGTGAAGAGTACCTGGCCGACCGACTGCTCGCTACATGGTGCCAGCTGTATCTTGCAGTCC<br/> CCGAGATCCCATGACTGCCACCGCAAGACAGACCGGCTACGCTGCGTGAGATCGGGTCTTCTTAACCTGGATCAGCTGGCAGCC<br/> TTGCAGCCTCGCGAGCAGTGGAGATCAAGGCTCCCGAGACCGAGATGGAGCACCGCTTCAACAGCTCTGGGCGGCAACATTGAATA<br/> TCAGCCGAGCAGCATAGGGACAGGCGACAGTTTCTCCGAATCGGCGGAGAATCGATGGCAGCCATCCGCTGGTGCAGCTCGCCG<br/> GAAAGAGGGCATAATCCTGACAGTGGCCGATATTTCAACCACCGCGCCTCGGCGATATGGCGCAAGAAGCCAAACGAGAACGGGCC<br/> CAGGACGTGACGACCATCCCTCCCTTCTCCCTGCTGCGTAGGGGCCACGACGTAAGAGATGCCTGCGCGTGGCTGCAGCCGAATGCCG<br/> CGTTTCGGCAAACCTCCATCGCCGACCTCTGCCCTGCACCCGCTGCAGGAAGGGCTGTTGGCCCTGACTGTCAAGCAGGCGGGGAA<br/> TATGTCGCGAGATGATCAGAGCTTCCAGTGGATGTGGATCTGGCGCGCTTCCGCGCTGACTGGCCCAAGTGTATCATGAAGCGGC<br/> GATTTTTCGCAACCGGATTTGAGCTGCCAACGCGGCTCCTGCAGGTGATGCGAGTCCAGCCAGCCGAATGGCCACGCGGGAG<br/> CGATCTCGGTATTTCTGGAGTCAGAGAAAGGAAAGCCATGGGACTGGGGACGTCGTTGGCGGGTTGGTCTGGTGTGCGATCAA<br/> GCGCAAGGCAAGGTGCTTTCTGCTGGACCATCCACCAGCCTTGATGATGGCTGGTGCCTGCGGCGATGCTGGAACGGGTGGAAG<br/> CCATTTATGCGGGTGGCAGCTGCGATATGCTCCCTCGTTTGGGGGTTTGTGAAATATCTGGCGGATGGTACAGTGGAAAGATGCGCAG<br/> GGTACTGGCAATCCAGTTCAATGGGATCCAGGCCGAGTCTTCCAGCCTTGCCTCCCAAGACTACCAGCCAAAGTGTGAGGATCTG<br/> CTCCAATACCAGTCTCGGAGTGTCTTGGCCCGGGAATGATATCAGGCCCTCACTGCAGTGCGAACAGCATGGGCAATTGTGCGAAG<br/> CCGTTATACCAGTCTCGGATGTGATCTTGGGGCCACAGTGTCCGGGCGACAGGCACCGTCCCGTTCGTTGAACGCATGCGCGGT<br/> CAACCATGCGACTGTTCCAGTCCGCGTGAATGTGCAGGGGGATGCCACGGTGGCCAGTTTGTGATGCGAGCGTTTCAGACACAGGCCGT</p> | <p>MPTENGEVQHRIDGLQDQDQDVEILLVTLSE<br/> WALQAVEEFKASKGMLEIGSVSDRSNDARK<br/> VKIELDGGTENILAQLRGEWVRLVHQHHE<br/> AASNFAASIILDGSPERLLVLRFMERREAWVS<br/> EEAPKSWCQERRCAPFLEMHCQARPEELQF<br/> HIVSPPVAAQAFVQHLDLRIRQISNRSLAD<br/> VPVETVPAASDELRAIWGWNGTLPQGVQR<br/> CVHDIIAQARLRPHAPAVSAWDGELDYQQ<br/> LDRISTRLAHYLVQLGAGPDDIIPLCFEKSKW<br/> MMVAILAVMKSQAVIAALDPTQPEDRLRSIV<br/> KQLQPRWILTSPAQIEVAARLEISNVIALDEGR<br/> LRQLPDSEGRHLPCVDPSRNLYIVFTSGSTGT<br/> PKGVMINHTNFSSAIAYQHEALGMDNTRAV<br/> FDASYAFDLAWGNIIHTLAAGGCLCIPSESE<br/> RRGNIAEAIIRLGNVHNLQTLPSVARLIDPRDIP<br/> AVRWILLIGEPMTQADVAQWTPYCKLINSYQ<br/> PAECTVAVTFQTIHPHRPWSSMGKGVACS<br/> TWIVDEEHGETLVPLGHTGELWLEGPLVQ<br/> GYLDLEKSAASFIDSPAWLTRGIPVVPGRR<br/> GRLYKTRDLVRYNPDGSLVYVARKDQIKIRG<br/> QRVELGDVEYHLKALPDKIPVAAEAITPRG<br/> SSSTILVAYLALGEEATGAAESTRESLASCLHG<br/> VEEYLADRLPRYMPVPSLYLAVPEIPMTATGKT<br/> DRLRLREIGSSSLTDQLAALQPSRAVEIKAPET<br/> EMEHLRQLLWAATLNIPSSIGTGSFLRIGG<br/> ESMAAIRLVQLARKEIILTVADIFNHPRLDG<br/> MAQEAQRERAQDVTTIPFSLRRRHGDVVD<br/> ACALAAAEVRVSANSIADLLPCTPLQEGLLAL<br/> TVKQAGEYVRQMVSELVVDVDFRFRAAW<br/> AQVIHEAAILRTRIVDLNAGLLQVVVADQPE<br/> WATGSDLGHFLESEKGMPLGLTSLARFGLV<br/> SDQAQKGLFVWTHHPLYDVGWLSLPAMLER<br/> VEAIYAGGSCDMLPSFAGFVKYLADGTVEDA<br/> QGYWQSQFNGIQAAVFPALPSPDYQPKCQD<br/> LLQYHVASVSWPGNDITASTAVRTAWAIVAS<br/> RYTQSPDVFIFGATVSGRQAPVFPVERMAGPT<br/> IATVPRVNVQGDATVASLMQSVQTQAVA<br/> MIPYEQTGLNQIRRNISDADQATQFQSLVQ<br/> QPPSSKTSRRPDECLFRVDLADGDEFRSINTY</p> |

GGCTATGATTCCGTACGAGCAGACGGGATTGAACCAGATCCGGCGGATCAATTCGGATGCAGACCAGGCAACCCAGTTCAGTCCCTGC  
TGTTGTACAGCCTCAAGCTCGAAGACCTCTCGTGGCCGGACGAGTGTGTTCCGAGTGGATCTGGATGCTGGTGACGAATTCGC  
AGTATAAACACTTATTCGCTTATGTTGGAGTGCCATCTCGAGTCCGACGGGATGCGCCTGCGCATGAGCTATGATCGCCTGGTTCATCGACG  
CGGAGCAGGTTAAGAGGATAGCCAGGCAGTTTGAAGGGGTGCTGCGCCAGGTCTCGAGTGAAGTGAATGCGCAGGAGCTGGTGGGC  
ACTGTCTCAGCTGCCAGTGAAGCCGACTGGCCAGGTGTGGGCCTGGAATGCAACTGTCCCCAGACCCTCCAGGGCTCTGTCAACG  
ACCTCATTGCGCAACGCGTTTACGCAACAGCCGATGCCCTGGCGATCTGCGCTGGGATGGACAGCTGAGCTACCAGGAACCTGATACC  
CTCTCCACGCAGCTGGCCCTATCGCTCGTGAACAGGGGGCAGGCCGTGGCTCGGTGATTCCCTTATGCTTCGAGAAGACAATGTGGAC  
GCCCGTGGCCATGCTGGCTGGCATGAAGGCTGGCAGTACTGTGGTTACAATGGACCCAGCCAGCCGAGGATCGATTGCAAGTCAATC  
ATCCAACAGACCCAACCGCCACTCATCTCACCTCCGACACATACAAGCCTCTGGCATCTCGACTCGAGGGGTGGTTCATCCGCGTGAAT  
CGGGATACCCTGCAGGCACTGCCACAGCATGACCTTGATACTCCAGATCTCCAACCATCCACCCGACGGACGACTCTACATCGCGTTC  
ACCTCGGGGAGCACTGAAAACCCAAGGGGGCAGTATGTCCATCAGAACATTGCGAGCGCAATCCACCACAGTACGGGGCGCTTGG  
GCTTTACGCTACCACCCGGGTGCTTGGATTTTCTCTATGATTTGACGCGGTGTGGGTGGAGTTTCTATGCGATGGCCGTGGGGG  
GCTGTCTGTGATCCCTTCGGACGCGCAGAGAAACAGTGGTGATCTTGCAGGCTGCATGGAAGGGTTGCGAGTGGACCTTGCTCTCCTG  
ACCCCGTCCACGGCCGGCTTCTCGACGCAGAGCAGTCCCCAGCCTGAAAACCTGGTCTGATCGGGGAGCCCGTCCAGAGCGATG  
ACCTGGCCAGATGGACCGGCAACGTTGATTTGAGGAATGGGTACGGCCCTGCAGAATGCTCCGCAATAACCGCAGCCTATAAATTTAG  
GGTCCAATGACCAAGCCAGTATCGTTGGCCACGCGGTGGGCCTCGTGGCTTGGGTGGTTGAACCATCGGACGGCCAGCCTCAGCC  
CCCTCGGAGCGGTGGGGGAGCTGTGGGTGGAAGGGCCGTTGGTGGAAAGGGGTATCATGGGGATCCAGAGAAGACAGCCATGAGT  
TTTGTCCATGACCCCGTCTGGCTGCTCCAGGGAACACTGGGCTATCTGGGCGGCCAGGTGCGACTCTACAAGACCGCGATCTTGTTCG  
ATATACTCCGATGGCAAGCTGGTTTGGTGGGGAGAAAGGACACGCAGGTCAAGATCCGCGGCCAGCGGGTGAAGTGGCCGAGAT  
CGAGCATTATCAAGAGGCCACCAGAGCTTCCGTGCTGGTGATGAGGACAGGCCCCAGGGCAGCAGAGGCCCGCTGGTGGCC  
TATGTGGCTTTAGGGCAAGTTGCAGCCGTGGGCTCCCCGAGGCAGTGGAGACGGCACTTCGCGCTGATCCAGGGGGTTGAAGATC  
ATCTGAGCAAGCACCTGCCCGGTATATGGTGCCGAGTTTCTATATCCCGTGGTGCATATCCCATTAACAGCCACGGGCAAGACCGACC  
GACGGGCATTACGCAATACCGGATCTCCTTCGCCATCGACCAGCTGGCAGAGCTGCAGCCCTTGGAGGGCAGAAGCGCACCTGCC  
CAGAGTGAGATGGAGCGGAGCCTGCAGCAGCTCTGGGCGGAGGTGTTGAACATCAATCCCTCTCAGATCGGCATGGATGAGAGCTTTT  
TCCTGCTCGGGGGGACTCTATCTCGCCATGCAGGTCTCTGCCAATCTCGCGGAGGGGGGTTCCGCTCACAGTCCAGATATCTTC  
AAATTCAAGACAATTGCGCGTCTAGCACGACGCGAGATCCAGATCGATGACCTGGCCATTGACGACCGAGAGATGCTCGACACCCCTT  
TGCCCTATCTCCATCAACAGTTTTCTTCGACGCCAGAAAGACAAGCAGGGTCACTTCAATCAAGCTTCTCTGTCGCGACTACCAA  
GCCCAACAGCCGACGCTGTACTGCGCGCCGTGAATTCATTGTTGCCCGACTCGATGCTGCGTGTCTGCTTCCACCCGGGGACCG  
ATGGGGTGTGGACGCAACAGATCACCTCGCGTGTGATGAATCCTATGCTTGGCGTATCATCGCCTGGCTTCGGTGGAGGACGCCGTT  
CGGTGCTGAATAGCAGCCAGCGGTCTTGGAGCTCCAGGCTGGCCCCATATTTGGCGTTGATCTGATCGACACTCCTCCAGAGTGTGAGT  
ACCTGTTTCTCAGCGCGCACCATCTCGTTGTCGACCTGTCTCTGGCGGATTATCCTGGAGGAGCTGGAGGAGTACCTGTTGACTGGCA  
CTGTTGGTTTCTCTGCGCCACTCTCATCCAGACCTGGTGGCGGTTTCAGGAGAGACACGCGCAGGACCATCTGACCCCGGACT  
GCCTTCCCGTTGATATTAGCCCGGTGTGAGGCGTACTGGGACTATGCCCGGAGCTCAATACGCACGATGCTATCCAAGAGGCCGG  
GTTTACCCTCAGCAAGAAAACGACCAGCATACTCTGGACCAGCGAACCATGCGTTCCAAACTCAGCCATCGAACTGTTCTAGCCG  
GCTGCTGCACTCTTATGAGACGCTTACTGACCGGATCCTCTACCATCTCAACGAGGGGCACGGTAGAGAGCCATGGAACCTCAG  
CAATCGACCTATCCCGGACGGTTGGCTGGTTTACCACCTGGCGCAATCTCAGTGAAGCGGGCTCCATCACCTTAGCATCCCCAGT  
TCGTCCGTTACATCAAGGATCGCCGCGACAGATTCCTCACAATGGGTGGTGTACTTACCTCACGGTACTTGAACACCGAGGGGAAG  
ACGGTCTTTAGCCGCCATGCCTGCCCTGAGGTTACGTTCAACTACTTTGGCCTCTATCAGCAACTGGAGAGGAGCGACGCGCTCTTCCAA  
TCGTGTCCAGTCTGCAGGACCGAGTGTGGATGTTGCAGACCGCATGGCCCGTTTGGCCTGATTGATGTTTCTGCGGAGTCCAGCA  
AGACTGCCTGCAGTTCGGTTTTTTCCAGCCAGCGCATGCAGAAGCAGGACGCCCTGGCTCGGTGGATTGCGGCGTGCAGCGTTTTG  
TTAGAAGCCACAGCCGTGCAGCTGCTAGATGCAACCCAGCTACAGTGGCCGACTTCCATGCTGCCCCCTACAGATGCAACGTGG  
AAGCAGCTGGAGACGCTCCACGGCTTGGCCTTGCTACGGTGACGTGGAGGATATCTATCCATGCTCGCCCTTGACGACGGGGATTCT

SLMLECHLESDGMRLRMSYDRLVIDAEQVK  
RIARQFEGVLRQVCSEVNAQELVGTVSAASE  
ADLAQVWAWNATVPQTVQGSVNDLIAQRV  
QQQPDALAICAWDGQLSYQELDTLSTQLALS  
LVQQGAGRGSVPLCFEKTMTWTPVAMLAG  
MKAGSTVMTDPSQPEDRLQSIHQQTQPPLI  
LTSPTYKPLASRLAGVIRVNRDTLQALPQHD  
LDPDLPTIHPDGLYIAFTSGSTGNPKGAVM  
SHQNIIRSAIHHSTGALGFTPTTRVLGFSSYAF  
DAVWVEFLYAMAVGGCLCIPSDAQRNSGDL  
AGCMEGLRVDLALLTPSTARLLDAEAVPSLKT  
LVLIGEPVTSDDLARWTGNVDLRNGYPAEC  
SAITAAYKFGPNQPSIVGHAVGLVAWVVE  
PSDGASLSPLGAVGELWVEGPLVGKGYHGD  
PEKTAMSFVHDPVWLLQGTGLYPRGRPRLY  
KTGDLVRYTSDGKLVCVGRKDTQVKIRGQRV  
ELAEIEHYIKEATRASVVVDMARPQGSRPV  
LVAYVALGQVAAVGSPEAVRTALRRCIQGVED  
HLSKHLPRYMVPSFYIPVVDIPLTATGKTD  
ALRNTGSSFAIDLQELQPSGGKRTLPQSE  
MERSLQNLWAEVLNINPSQIGMDESFLLG  
GDSISAMQVSAKSRARGVRVTPDFKFTIA  
RLARREIQIDDLAIDDREMLDTPFALSPIQQF  
FFDAQDKQGHFNQSLVTRTKPQQPDAVL  
RAVQFIVARHSMILRARFHRGTDGVTWQQIT  
SRADESACRHHRLASVEDAVPVLNSSQRSL  
DVQAGPIFAVDLIDTPPDCQYFLTAHHLVVD  
LVSWRIIELEEYLLTGTAVGSSAPLSFQWTC  
RLQERHAQDHLTPGTAFFDIQPPCEAYWGL  
SPELNTHDAIQEAGFTLSKKTTSILLGPANHA  
QTQPIELFLAALLHSFMDSFTDRDPPTIFNE  
HGREPWNQSAIDLRSRTVWFTLAPISVEAGS  
HHLISIPQFVRYIKDRRRQIPHNGWSYFTSRYL  
NTEGKTVFSRHACPEVTFNYFGLYQLERSD  
ALFQSCPSLQDRVLDVADRMARFALIDVSAE  
VTQDCLQFRFLSSQRMQKDALARWIAACE  
RLEATAVQLLDMQPSYTLADFPPLPPTDAT  
WKQLETLPRLGLAYGDVEDIYPCSLQQGILL  
SQAQSPEMYWTRVWVRSSTGASSPVDA  
DRLERAWRKVVARHAALRTRFSDSPFSDGYS  
YQIVLKDPPTIHTIQAADPMDAVVEYRAAS  
GSQVRPVHSLVLCPMASGLVCDLQINHAI

GTTGAGTCAGGCAAAAAGCCCGGAGATGTATTGGACCCGAGTGCGTTGGGTTGTCCGGTCCAGTACGGGGGCATCATCTCCGGTTGAT  
GCAGACCGACTGGAACGTGCCTGGCGGAAGGTCGTCGCACGCCATGCTGCACTCAGGACTAGATTCTCTGACAGCCCCTTCTCAGATGG  
ATATAGTTACCAGATAGTCTTGAAAGACCCTCCCCACTATTACACCATCCAGGCTGCGGACCCGATGGACGCCGTTGTCGAGTATCGA  
GCAGCCAGCGGTCGCGAGTCCGGCCAGTGCACCTCTCTGGTCTTTGCCCTATGGCCAGCGGAGACCTCGTGTGTGACCTGCAGATCA  
ACCACGCCATCATCGATGCCATATCCATCCGGGTTCTGAAACGCGAGCTGTGTGCCGCGTACGACGACGCCCTCCCTGCGGACCCAGGG  
CCCCGGTACAGTACTATACGCCATCTCCAGTCTTGGCGACGACGGAGGCGAAAGAATACTGGCAGACGCAGTTGGCTGGCGCTCA  
GCCATGCATCTTCCCTACCCTGAATGAGCCCATCGCCGAACCAAGGACGCGGCCGCCGTTACATCTCTGCCGATCAGCCCGGAGACGG  
ACCAGGCCCTGCGCCAGTTCTGCCGAAGCCATGCCCTGACCCCGCCAACGTGTTCACTCTCGCGTGGATGTTGGTCTACGCAGCTAC  
ACCAGCAGCGAGTCCGTCTGCTACGGCTATCTGATCTCTGGCCGGGATGTGCCATACACCAGGTAGATCGAGCGGTTGGACCGTTCATT  
AACATGGTGGTCAACCATGTGAGATAGACAGCAACCGAACCCCTCTAGCAATGCTGCAAGAGGTTACAGGACGGGTACCTAGGAAGTCT  
GAAGTACAACCAATATCCGCTGGCCGAGATCTGTCATGACCTCAGCACCAGGGGGCAGCCCTTCTTAATACGGTCTGTGCGGTGCAGA  
GTGGCGGCAGGGCCGACTCAGCCAGCCCCAGACACACCACCATCACCCTCGAGAACGAGACGTGGCACGATCCGAACGAATACGA  
CATTGCCGATCGGTCCTGCTGCTGGACGACAATCCAGAATCAGCTGAACTACTCCGCCATCTGCTTTCGGAGCGACAGGCCAGTGC  
CGTGGGGGCGACGTTTGTGGAAGCCCTGGCCAATATCGTCCGCATCCGGACAGAAACCTCTGCGATCTGGAGACGACGATCAGTCCC  
AGGATCTCGCCACCATCTGGGACTGGAATGCCAAGGTTCCCGGACCTTGTCCAGCTCGTGGCCGAGCTGTTCTCCGATGGGTGAAG  
CAACAGCCTGATGCGCAGGCCGCTGTGCTGGGATGGAGACTTGACCTATCGTCAACTCGACGAGGGGTCGTCGCCGGTGGCTACC  
ATCTGCTGGCTCGGGGTGTCGCCCGCAGTCAACTGCCCCTGTGCTTCGAGAAATCCCGGTGGGTGCCGTGGCCATGCTGGGGGTG  
CTAAGGACGGCTGCGCGGTAGTCACGATGGATCCGGAACAGCCCGTGGAGCGCCTACAGCTCGTGGTGCAGAAGACTCAAGGGGTG  
ATTCTGACATCGCCAGCCTGTACGGGCTAGCATCCAGCTACGTCTGAGGCTGTGCTGCTGGATGGGCGATCGCTTGAGAGGATGCC  
TCAACAGACCCGCTGTCTGCCACGATCCATCCACGGACAGGCTCTTCTGGTGTTCCTCCGGCACCAGGGACCCCAAAGG  
GTCTGTGATGAGCCATCAGAACGCATGCTCGGCAGTTCACCACAGCAGGACGCTTGGGCTGCCGCCGACGCCGAATGATCGATT  
GCCTCTCATA CGCGTTCGACGCTCCCTGGTTCAACTTTTTGCATGCCTTTAGCTCAGCGGTTGTCTGTGTTCGTCGCGATCAACAGCG  
GAAGGACAATCTGGCGGGCTGTATCGAGAGCCTCAAGGCCAACTACGCGCTTCTTACGCCCTCGATTGCCAGAGTCTGGACCTGCAG  
CGGTGCCTGGCCTGGAGACACTTGATTGCGCGGGGAGGCTATACGCGCGGAGGATATCAGTCGATGGCAGGAGGTCAGGCTGATGGG  
GTATTATGGTCCCTCGGAGTGCACCTGCTCTCAACCATCCACCAGTTCGAGAGCAAAACAGAGGAACCCAGAATGCTCGGTTATTCTC  
TGGGCTGACAGCCTGGGTGGTGGACCCGTTGACGGGGAGACGCTGGCACCCTGGTGGCAGAGGACTCTGTGTGAGGGTGC  
CGCTGTGCGACAAGGGTATATCGATGAGCCCAGAAAGACTGCGGCCAGCTTGTGGAAGATCCAGCTGGCTTCTCCGTGGTGGAGG  
GCCAGACTTCCCTGGACGTGGGGCCGGGTGTATAAAACAGGAGATCTGCTCCGATTTCGTCGCCGATGGATCGCTCTGTATGTCGGGC  
GCAAGGATACTCAAGTGAAGATCCGGGGCCAGCGGGTGGAGTTGGGCGAGGTTGAGCATCACATCCGCCAGACGCTGCCAGCCGGCG  
TGGATGTCCGGTGGTGTGGAAGTGGTCCACCCCATGCAAGTGCAATCCGGTGTGTTGGCCTTTTGGCCGTGGGAAAGGAAGC  
TGCTGGGTACCGAGTCAATGCGTGCAGTCTGACCCGCTATACGACGCGGGTGGAGGACCCGCTGATGGCCGACTGCCAGCTATA  
TGGTCCCTCGCATGACATCCCGTGCCAGCGATCCCATTCACGACGAGGGAAAGACAGACCCGCGAGCTGCAACCGGTCGCGTC  
TTCGTATACCCTGGAGCAGTGGCAGCGCTTCAGCCCTCGCGGGACACTCGTCTGCGCCACAACGGCGATGGAGCGGCGTCTGCAA  
GGATGTGGGCTACTATCTGGATATCGATGACGATGACCATCGCGGCCACCGACAGCTTCTGCGGATTGGAGGTGACTCAATCGGAGC  
CATTGACTCGTGCAGTGGCTGCAGAGCAAGACATCTGCTCACGGTGGCAGCCATCTTCAAATCTCCATTCTGTGTGACATGGCGCA  
GGTGGGCACTGGGATCGACTTCCGGACCTCATGACATCCCCCATTTTCACTGCTCAAGCAAGACGTGGATATCTCGCAGGCGCGATT  
GCAGGTGGCGGCTGGTGTGAGCTCAGCCGCTGCTGTGAGGATATCTTCCGTGACACCTTCCAGGAAGGTCTGCTTCTCTGA  
CGGTCAAGAATCAGGGCGCTATGTGAACCGCCAGGCTCTGCAACTTCGAGACGAGGTGACCTTGGACGCTTCAAACCGCCTGGAA  
TCAAGTCCGATGCCCACGTCGATCTGCAACCCGATCGTGGACCTTCCGGGGCAAGGGTTGGTGAAGTGTACCAGCGAGGTG  
CCACGGTGAACCATGGCCGTAGCCTCGACGCACTCGTGAAGACGATCTGCAACGTCGGTAACCTTGGTACCCCTTGGCCACATT  
TGCTTGGTGGACGCCGGTACGTTGGTGGGATCGGCAACGGTACTTCTGCTAACGCTTCATCATGCGCTCTATGACGGATGGTCTCT  
GTCGCTGCTGCTGGACGAGGTCAGCAAGGCCTACCACGGGACCGCGAGCGACGGCCTGTCTCCTTCAAGACAATGATCAAGTATGTG

DAISIRVLKRELCAAYDDALPADPGPRYSYIS  
HLQSLPTTEAKEYWQTLQAGAQCIFPTLNE  
PIAEPKDAAAVTSPLISPETDQALRQFCRSHA  
LTPANVFLAWMLVLRYSSESVCYGYLISGR  
DVPIHQVDRVGPFINMVMVNHVEIDSNRLL  
AMLQEVQAGYLGSLKYNQYPLAEILHDLSTE  
GQPFNTVLSVQSGGRADSAQPPDPTITLE  
NETWHDPNEDIAASVLLDDNPRITLNSR  
HLLSERQASAVGATFVEALANIVRHPDRNLC  
DLETTISPQDLATIWDWNAKVATLSSSPEL  
FSRWVKQPDQAQVCAWDGDLTYRQLDEG  
SSRLAHHLLARGVPRQJILPLCFEKSRRVPA  
MLGVLKAGCAVVTMDPEQPVERLQLVQKT  
QGILTSPACQGLASQLRPEAVVDGRSLER  
MPQDPPLSLPTIHPTDRLFLVSSGTTGTPKG  
SVMISHQNACSAVHHQARLGLPPAARMID  
CLSYAFDAPWFNLFHFSSGGCLCVPSDQQR  
KDNLAGCIESLKANYALLTPSIARVLDPAVPG  
LETLAFGGEAIRAEDISRWHEVKLMGYGYS  
ECTVSTIHQFESKTEPRMLGYSSGLTAWVV  
DPLQGRRLAPLGLATGELCEVGLVQGYIDE  
PQKTAASFVEDPSWLLRGGGPDFGRRGRV  
YKTGDLVFRFPDGSLLVGRKDTQVKIRGQR  
VELGEVEHHRQTLPAVDVPPVVELVHPHA  
SANPVLVAFPLVPGKEAAGSSEMRVLDRYT  
HGVEDRLMARLPSYMPRMYIPVPAIFTTT  
GKTDRRSLQRVASSYTLQLAALQPSRDTRR  
APTAMERRLQGMWATILDI DAVTIAATDSF  
LRIGGDSIGAIRLVRLAAEQDILLTVAIFKSPIL  
CDMAQVATLGSTSGPHDIPPFLLKQDQVDS  
QARLQVAAWCELSPSAVEDILPCTPLQEGLLS  
LTVKNQGAYVNRQVLRLREVDLGRFQTAW  
NQVAMATSILRTRIVDLPQGQLVQVVTSEVP  
RWNHGRSLDALVQDDLQRPVTLGTLATFG  
LVDAGDVGGDRQRVFLTLHHALYDGSLSL  
LLEDESKAYHGTASDGLVSFKMIIKYVTELGA  
EADSYWQGSGLDGLVAEPFALPSPMYQPRA  
QDILEHNVGLRLWLNHHITPATTLRAAWAI  
LTHTYQSADVLFGSTVTRQAPIHRVGLVEG  
PTIATVPVRIAIQEKATLAGLLDQVQEYSVDM  
IPYEQVGLQRIRLSADTERACQFQTLVVQP  
APEPSATDGPALFHAEDDLSQAALSSFSNY

|                                                                                                                                                                                                                                                                                                                                                                                                                                                                                                                                                                                                                                                                                                                                                                                                                                                                                                                                                                                                                                                                                                                                                                                                                                                                                                                                                                                                                                                                                                                                                                                                                                                                                                                                                                                                                                                                                                                                                                                                                                                                                                                                                                                                                                                                                                                                                                                                                                                                                                                                                                                                                                                                                                                                                                                                                                                                                                                                                                                                                                                                                                                                                                                                                                                                                                                                                                                                                                                                                                                                                                                                                                                                                                                                                                                                                                                                                                                                                  |                                                                                                                                                                                                                                                                                                                                                                                                                                                                                                                                                                                                                                                                                                                                                                                                                                                                                                                                                                                                                                                                                                                                                                                                                                                                                                                                                                                                                                                                                                                         |
|--------------------------------------------------------------------------------------------------------------------------------------------------------------------------------------------------------------------------------------------------------------------------------------------------------------------------------------------------------------------------------------------------------------------------------------------------------------------------------------------------------------------------------------------------------------------------------------------------------------------------------------------------------------------------------------------------------------------------------------------------------------------------------------------------------------------------------------------------------------------------------------------------------------------------------------------------------------------------------------------------------------------------------------------------------------------------------------------------------------------------------------------------------------------------------------------------------------------------------------------------------------------------------------------------------------------------------------------------------------------------------------------------------------------------------------------------------------------------------------------------------------------------------------------------------------------------------------------------------------------------------------------------------------------------------------------------------------------------------------------------------------------------------------------------------------------------------------------------------------------------------------------------------------------------------------------------------------------------------------------------------------------------------------------------------------------------------------------------------------------------------------------------------------------------------------------------------------------------------------------------------------------------------------------------------------------------------------------------------------------------------------------------------------------------------------------------------------------------------------------------------------------------------------------------------------------------------------------------------------------------------------------------------------------------------------------------------------------------------------------------------------------------------------------------------------------------------------------------------------------------------------------------------------------------------------------------------------------------------------------------------------------------------------------------------------------------------------------------------------------------------------------------------------------------------------------------------------------------------------------------------------------------------------------------------------------------------------------------------------------------------------------------------------------------------------------------------------------------------------------------------------------------------------------------------------------------------------------------------------------------------------------------------------------------------------------------------------------------------------------------------------------------------------------------------------------------------------------------------------------------------------------------------------------------------------------------|-------------------------------------------------------------------------------------------------------------------------------------------------------------------------------------------------------------------------------------------------------------------------------------------------------------------------------------------------------------------------------------------------------------------------------------------------------------------------------------------------------------------------------------------------------------------------------------------------------------------------------------------------------------------------------------------------------------------------------------------------------------------------------------------------------------------------------------------------------------------------------------------------------------------------------------------------------------------------------------------------------------------------------------------------------------------------------------------------------------------------------------------------------------------------------------------------------------------------------------------------------------------------------------------------------------------------------------------------------------------------------------------------------------------------------------------------------------------------------------------------------------------------|
| <p>ACAGAGCTGGGTGCCGAGGCGGACTCCTACTGGCAAGGCAGCCTGGATGGTCTGGTGGCCGAGCCATTCCCTGCCCTGCCCTCTCCAT<br/>GTACCAGCCACGCGCAAGACATCCTGGAGCACAACTATTAGGGCTACGGTGGTTGCAAAACCACCATCACACCGGCAACCCTC<br/>TTCGCGCGCTGGGCCATTCTACAACCCACTACACCAATCTGCGGATGTCCTTTTTGGATCGACCGTGACTGGACGCGAGGCTCCCA<br/>TTCACCCGCTGGGACTGGTGAAGGGCCGACAATTGCAACTGTGCCGGTCCGCATTGCCATCCAGGAAAAGGCTACCCTGGCAGGCT<br/>ACTCGACCAGGTCCAAGAGCAGTCTGTGCATATGATCCCTACGAACAGGTGCGGGTTCGAGCGAATCCGGAGGCTCAGCGCCGACACC<br/>GAGCGAGCTTGTCACTTCAGACGCTCCTGGTGGTGCAGCCAGCCCCGGAACCGAGCGCCACAGATGGACCTCTGCACTGTTCCATG<br/>CAGAAGATGACACTCTCAGCCAGGCGGCTCTCAGCAGCTTCAATTACACGCTCTCTTGTGCAATGCCAGCTGACGGCCACGGGGTG<br/>TCCATGCAGATGAGCTACGACTCGCATGTCATGGCACAACCGCAGGTGCAACGGCTGGCCCCGCGAGTTCGAGCATCTAGTACGACTCCT<br/>TTGCGATGAGTCTCAGCACTCATCCTCTGTTGCTCACATAGATGCGGTCTGCGAGGATGATCTGCGAAGGATCTGGGCGCTGAACCTCCC<br/>GCCCCGGCCAGAGTGGACGCTCATGCAGACTTGATACCGAGCAGGCCACGCGCGGAGTCTCACAGCCGTCGCTGCATG<br/>GGATGGAGAGCTCAGCTATCGCGAGCTGGACGAGCTCTCCACCCAGTTGGCATATGGCCTCGTCAACTTGGGGTGGCCCCCATGCG<br/>GTGGTGCCTCTGTCTTTGAGAAATCAATGTGGATGCCCGTGGCAATGCTGGAGTCAAGAAAGCCGCGGTGCATCGGTGGCCATGGA<br/>TATCACGCGCCAGAGGACCGCTTCGACGGTAGTGCAGCAGGTACAGCCTCCTCTGGTCTGAGCTCCCTGGAGGCAGAGGACCTG<br/>GCACGGCTCTGAGCGATAGGCCGTCACGTTGCTCTCAAGACAGACTGCAGACGACGTCGCTGGGCGAGCGCCAGGGCGGCCAA<br/>TTGCCCCAGTTGAGCCGACAGACAGGCTGTATATTGCCTTACCTCAGGTAGTACGGGGTCCCGAAAGGCGCGGTATGTCCACCA<br/>GAACTTACCAGTGCCGTGCACCACCAACCCTCGAGTTTACTGCGTCCGCCAGGGTGTGTTGACTTTTCTGCTCCTACGCGTTCGATG<br/>TTGCTGGTGAACCTTCTCCATACGATGGCGGGGTGCTGTCTGTCATCCCCTCCGAAGAGGAGCGCAAGAGCGACATCACTGGCT<br/>GCATGCGCCGCTGGCCGTGACTTATGCGAACTCACGCCATCCACCGCAGTCTGATCGATCCGACGTCCGTCGCCAGCCTCCAGACCC<br/>TCGTTCTGGTCCGAGAGCCGGTGGCACAGCAGGACATCACTCAGTGGAAAGCCACGTCAGCTGAAGAACGGTTATGGCCCTGCGG<br/>AATGCAGCGCCATCTCCACCAGTTCGATCTCGGGCAAAGTGACCACGACCCGGCAACCATGGCGCGGAGAGGAATGGTGACCTG<br/>GGTGGTTGAGCCGACCGAAAGCCGACATTTGTCGCCGTACGGGGCTGTGGCGAGCTGTGGGTGGAAGTCTCTGTTGGATTAGG<br/>GTATCTCGGCCGTCGGATCTCAGTGCTGCAAGCTTCGTCGACAACCCCCATGGCTGCTGCGCGGGGACCCAGGGGTTCCAGGTC<br/>GACATGGCCGCTTACCACCGGCTGACCTGGTGGGTATAATCTGGACGGCACCCTGGTCTGTATTGGCCGAAAGATGCCAGGTC<br/>AAGATCCGCGGACAGCGGTGGAGCTGGCCGAGGTCGAGCATCATCTGCACCAGGCTTACCTTCCGCCGCGTGGACGTCTCTGTGG<br/>CAGTCGAGGTCATACCCTGCAGGGCAGTGCCAATCCACTGCTAGTCGCTTTGTGGCGATGGGGGAGCGGCCCTGGGCCGCGG<br/>AGACTGTCCGAGCAAAGCTGGCTCTTACAGCCAGGGGGCCAGGGAGCGCATGGCAGACCAGTGCCTCTACATGGTGCCAGTCT<br/>GCTTCTCCGGCGTTGAAATTCCACGAGGCCACGGGCAAAAGAGATCGACGCGGGTGCCTGAGATGTGGGCTCCAAGTCCCTG<br/>GAGGAACTGGCCGAGCTGCAGCCGACCAAGGGCAACCACCAAGCACCGACGACAGACGTCGAACGGCGGATTCTGCAACTGTGGG<br/>CGAGTGCTGAATATCAGCGCATCGAAGATCAGCATTACGATAGCTTCTTCGCCCTTGGCGGGGACTCAATCCTCCGCCATGCAGCTCT<br/>GGCAAAGGGCCGCTCCATCGACTCCAGATGACTGTAGGGGACATTTTCAAGTACAAGACAATCGCTCGACTGGCTCTCAGCATCTCC<br/>CAGCAGTGAATCGGCCGTGTACATGCCCCAGAGGGCCAGGGTGCCTCTTTGCCCTGTCTCTATCCAGCAGATGTTCCGTCGATGC<br/>AGCAGGGGGTTAGCAACCATTTCAACCAAGCTTTTTCTGTCAGGTACGTCGACCGTCCAGCTCAGATCCAGGCGGCTGTGGAT<br/>GCCCTGGTCGCCATCATGGCATGTTGCGCGCGCTTTCAAGTGCAGCAGGGAGAATATCGAGCGAGTGGATTCTGCCCCGGGGA<br/>CCACAGGAAGTATCGCGTTTGCAGCATGAGGTTGCGGGTCTTACGGCAGCCTCGCGGTGATCAATCACAGCCAGGAGTCGCTAGA<br/>CATCCAGAACGGTCCGCTCATGGCGTGCATCTGATCAATGCAGACGAGGGCCAATACCTTTTCTGGTGGTCCACCACATGGTCTGCA<br/>CCTGGTGTCTTGGAGAATCATCTGGCTGATCTGGAAGAGCACTTGACCACCGCATCCCTCTCCGGTTCACCTCGATGTCCTTCCAGAC<br/>CTGGTGCCAGTTGACGGCTGACCACCACGCGAGAGCCCCCTTTCGAGCTGGAGGCTGTCTGCCAAAACGGGGCTCCGCTCCGCTGCTG<br/>CCACAGTACTACTGGGTGAGGTCAGGTCGCGAGCTTAAACACATTGATAACATGATCAAGGATGGCGTGGTCTCGGCAGGCAGGACAC<br/>AGAGACCTTGTAGGGCTGGAATGGGCATTGACACAAAATGGTGGAGCTCCTCATCGGCCATCCTACATTCCTTTGCCAATGT<br/>CTTCCAGACCGGGCACCTCCGACGGTATTACGCGAAGGCCATGGTGGGAGCCCTGGAGGTCTGCAATCGATATTTACGCACGGTGC<br/>GGTGGTTTACCAGATGTTCCCTGTGGTCCGCACAGCCAAGAAGGGAGATAGTATTGCCAGCATTGTGCGCCATGCAAGGACCGTCA<br/>CGCCAGATACCCGATAATGGCCGGCCATACTTTGCAAGCCGCTTCTACTCCGGTGGCAAGCGGGCTTCCAGGTCAATGGCCCTGTC</p> | <p>ALLQCQLTATGVSQMMSYDSHVMAQPQV<br/>QLRLARQFEHLVRLLCDESEQHSSVAHIDAVCE<br/>DDLRRRIWALNSPPPARVDACMHDLITEQAQ<br/>RRPVSQVAVAWDGELTYRELDLSTQLAYGL<br/>VNLGVGPHAVVALCFEKSMWMPVAMLGV<br/>MKAGGASVAMDITQPEDRLRTVVQQVQPP<br/>LVLSLEAEDLARRLSDRPVHVVSQDRLQTT<br/>LGGGQGGQLPPVQPTDRLYIAFTSGTGPVK<br/>GAVMSHQNFSAVHHQTALEFTASARVDF<br/>SSYAFDACWLNFLHTMAAGACLPISEERK<br/>SDITGCMRRLAVTYANLTPSTARLIDPTSVPSL<br/>QTLVLVGEVPAQQDITQWKAHVQLKNGYGP<br/>AECSAISTTFFDLQSDHDPATIGAGRMV<br/>WVVEPTESRHSPYGAUGELWVEGPLVGLGY<br/>LGRPDLAASFVDNPPWLLRGGPQGFGRH<br/>GRLYRTGDLVRYNLDGTLVLCIGRKAQVKIRG<br/>QRVELAEVEHHLHQALPSAAVDVSVAVEVIT<br/>LQGSANPLLVAFVAMGEAALGPRETVRAKLA<br/>LYSQGARERMADQLPVYMPVSLLLPAVEIPT<br/>TATGKRDRRLREMWASKLEELAELOPTKG<br/>NHQAPTTDVERRILQWAECLNISASKSIHD<br/>SFFALGGDSISAMQLSAKGRSIDLQMTVGDIF<br/>KYKTIARLALSIPAVESAVLHAPEQGASFAL<br/>SPIQQMFADMQQGVSNNHFNQSFVQVRRP<br/>VTLPQIQAADVLAHVHGMRLRARFKSRENI<br/>WSQWILPPGTTGSYRVCQHEVAGLQAASAV<br/>INHSEQSLDIQNGRLMAVDLINADEGQYFL<br/>VVHMMVVDLVSWRILADLEEHLTTASLSGFT<br/>SMSFQTWCQLQADHHAESPFLEAVLPNGA<br/>PPPLLPQLDYWGQVRSNLTFDNMIKDGVL<br/>GRQDTELLGPANAADFQTMVELLHAILHS<br/>FANVFHDRAPPTVFSEGHGREPVSAIDISR<br/>TVGWFTTMFPVATAKKGDSIASIVRVKDR<br/>RRQIPDNRPYFASRFLTPAGKRAFQVNGPV<br/>EVIFNYLGLYQLERSDALFHMREMPDGDV<br/>DMADISGSLFRFALVDISASVTDGLHVD<br/>YNRHMQHQASIRAWIKECRQSLHAAQELP<br/>LIQPSYTLCSFPLLRMTDPALAILQRLTELDL<br/>AYGQVEDIYPCSPQLDGLMSQIKNPDLRTR<br/>IRWMAQSAQGSTAVDTNRLKHAWQVVD<br/>RHPALRTIFVDSISGRGLKQVVRNLRADV<br/>HIVQSADEASIEDMSPTKGTSSVLTSTNS</p> |
|--------------------------------------------------------------------------------------------------------------------------------------------------------------------------------------------------------------------------------------------------------------------------------------------------------------------------------------------------------------------------------------------------------------------------------------------------------------------------------------------------------------------------------------------------------------------------------------------------------------------------------------------------------------------------------------------------------------------------------------------------------------------------------------------------------------------------------------------------------------------------------------------------------------------------------------------------------------------------------------------------------------------------------------------------------------------------------------------------------------------------------------------------------------------------------------------------------------------------------------------------------------------------------------------------------------------------------------------------------------------------------------------------------------------------------------------------------------------------------------------------------------------------------------------------------------------------------------------------------------------------------------------------------------------------------------------------------------------------------------------------------------------------------------------------------------------------------------------------------------------------------------------------------------------------------------------------------------------------------------------------------------------------------------------------------------------------------------------------------------------------------------------------------------------------------------------------------------------------------------------------------------------------------------------------------------------------------------------------------------------------------------------------------------------------------------------------------------------------------------------------------------------------------------------------------------------------------------------------------------------------------------------------------------------------------------------------------------------------------------------------------------------------------------------------------------------------------------------------------------------------------------------------------------------------------------------------------------------------------------------------------------------------------------------------------------------------------------------------------------------------------------------------------------------------------------------------------------------------------------------------------------------------------------------------------------------------------------------------------------------------------------------------------------------------------------------------------------------------------------------------------------------------------------------------------------------------------------------------------------------------------------------------------------------------------------------------------------------------------------------------------------------------------------------------------------------------------------------------------------------------------------------------------------------------------------------------|-------------------------------------------------------------------------------------------------------------------------------------------------------------------------------------------------------------------------------------------------------------------------------------------------------------------------------------------------------------------------------------------------------------------------------------------------------------------------------------------------------------------------------------------------------------------------------------------------------------------------------------------------------------------------------------------------------------------------------------------------------------------------------------------------------------------------------------------------------------------------------------------------------------------------------------------------------------------------------------------------------------------------------------------------------------------------------------------------------------------------------------------------------------------------------------------------------------------------------------------------------------------------------------------------------------------------------------------------------------------------------------------------------------------------------------------------------------------------------------------------------------------------|

|                                                                                                                                                                                                                                                                                                                                                                                                                                                                                                                                                                                                                                                                                                                                                                                                                                                                                                                                                                                                                                                                                                                                                                                                                                                                                                                                                                                                                                                                                                                                                                                                                                                                                                                                                                                                                                                                                                                                                                                                                                                                                                                                                                                                                                                                                                                                                                                                                                                                                                                                                                                                                                                                                                                                                                                                                                                                                                                                                                                                                                                                                                                                                                                                                                                                                                                                                                                                                                                                                                                                                                                                                                                                                                                                                                                                                                                                                                                                                                                                                                            |                                                                                                                                                                                                                                                                                                                                                                                                                                                                                                                                                                                                                                                                                                                                                                                                                                                                                                                                                                                                                                                                                                                                                                                                                                                                                                                                                                                                                                                                                                                                                                                                        |
|--------------------------------------------------------------------------------------------------------------------------------------------------------------------------------------------------------------------------------------------------------------------------------------------------------------------------------------------------------------------------------------------------------------------------------------------------------------------------------------------------------------------------------------------------------------------------------------------------------------------------------------------------------------------------------------------------------------------------------------------------------------------------------------------------------------------------------------------------------------------------------------------------------------------------------------------------------------------------------------------------------------------------------------------------------------------------------------------------------------------------------------------------------------------------------------------------------------------------------------------------------------------------------------------------------------------------------------------------------------------------------------------------------------------------------------------------------------------------------------------------------------------------------------------------------------------------------------------------------------------------------------------------------------------------------------------------------------------------------------------------------------------------------------------------------------------------------------------------------------------------------------------------------------------------------------------------------------------------------------------------------------------------------------------------------------------------------------------------------------------------------------------------------------------------------------------------------------------------------------------------------------------------------------------------------------------------------------------------------------------------------------------------------------------------------------------------------------------------------------------------------------------------------------------------------------------------------------------------------------------------------------------------------------------------------------------------------------------------------------------------------------------------------------------------------------------------------------------------------------------------------------------------------------------------------------------------------------------------------------------------------------------------------------------------------------------------------------------------------------------------------------------------------------------------------------------------------------------------------------------------------------------------------------------------------------------------------------------------------------------------------------------------------------------------------------------------------------------------------------------------------------------------------------------------------------------------------------------------------------------------------------------------------------------------------------------------------------------------------------------------------------------------------------------------------------------------------------------------------------------------------------------------------------------------------------------------------------------------------------------------------------------------------------------|--------------------------------------------------------------------------------------------------------------------------------------------------------------------------------------------------------------------------------------------------------------------------------------------------------------------------------------------------------------------------------------------------------------------------------------------------------------------------------------------------------------------------------------------------------------------------------------------------------------------------------------------------------------------------------------------------------------------------------------------------------------------------------------------------------------------------------------------------------------------------------------------------------------------------------------------------------------------------------------------------------------------------------------------------------------------------------------------------------------------------------------------------------------------------------------------------------------------------------------------------------------------------------------------------------------------------------------------------------------------------------------------------------------------------------------------------------------------------------------------------------------------------------------------------------------------------------------------------------|
| <p>GAGGTGATTTTCAACTACCTCGGGCTGTACCAGCAACTCGAGCGGTGGACGCCCTTCCACATGCGCGAGATGCCGGACGGGGTGG<br/> ATGACATGGCTGATATCTCGGGGAGCCTGTTCCGATTGCTCTGGTGGATATCTCGGCATCGGTGACGGATGGCTGTTTCATGTTGACTT<br/> CATGTACAATCGGCACATGCAACACCAGGCTCCATCCGCGGTGGATCAAGGAATGCAGGCAGTCCCTCCACGCCGAGCGCAGGAG<br/> CTTCTCTGATACAGCCAAGTTATACCCTCTGCAGCTTCCGCTGCTGCGCATGACAGACCCGGCATTGGCAATCTGCAGCAGAGGCTG<br/> ACGGAGCTGGACCTCGCATACGGGCAGGTGAAGATATCTACCCTGCTCGCGCTCCAGGATGGAATCCTCATGAGCCAGATCAAGAA<br/> CCCAGACCTCTACAGGACACGCATCCGGTGGATGGCACAGTCTGCACAGGGATCAACAGCAGTTGATACCAACGGGCTCAAGCACGGC<br/> TGGCAGCAGGTGGTAGACCGCATCCAGCCCTGCGCACCATCTTGTGACAGCATCTCGGGCAGGGGACTGAAGGATCAAGTGGTGG<br/> TGAGGAATCTCCGGGACAGACTCCACATCGTCCAGTCCGCGGACGAAGCAAGTATCGAGGACATGCCCCAACAAAAGGCAAAACCAG<br/> CTCAGTGTCACTCTGTGACGACGAACCTCGGGCTCTGTGCGAGCTATCGATCAGCCATCGGCTCATCGACGCCCTTACCTTGGGAAT<br/> CCTCAAGCAGGAGCTGTGTGCGCATATACTGGCCTCTTCTCTTCCCTGGACCCCTGTATAGCGACTACATCCACTTTCATCCAGTCCC<br/> TGCCCGCTGGGTACGCCGCGGCATACTGGCAGGAGCATCTCCAGGAGGTCAAGCCCTGTCTATTTCATCCTTGGGCGGTCTAAATACG<br/> GAAGGCCGGCGGTGCAAGCTCACATCCCTATTACCTTCGAGCGAGAGCTACACCTGGCATTGCGCATCTTTGTCATGGAGCATGGACT<br/> GACGGTGTCTAATATCTTCATGTCGCTTGGGCCCTGGTCTGCGGGCTTATACTGGTTGGATACTGTCTGCTTTGGCTATCTCACATCAG<br/> GCCGAGATATTCTCTGCAAGGGGCTGACGGAAACCGTTGGTCCATTATCAATATGCTTCCAGCCGCGTGGACTGGGCAGTAAGGAC<br/> TCGCTGATGACCCCTGGTACAGAGGGACAGGAGCAGTATCTCAACAGTTTGGAGTTTCAGCATTACCCGCTGGCCAAGATCTCCACTT<br/> GATTGATACGCCGAGAAGGGGCTTTCAACACCGCATGTCAGTCCAAGCTAGTACTGCTGCCAAGGACTGCCAATCGGCTATATC<br/> GCTTGTAGATGAAGGAGGAGATGATCCACCGAGGTAAGAAAAGATAAGAAAGACTTTTTCTTTGTGTGACTGCGCTAATGCGAGACTCA<br/> GTATGATATCATGATAAACATTGGCGTCCGAGACGAGGACACCGGATGCAACTTTACCTTTAACGAATCGGTGATATGACCCGCTATGCA<br/> AAGAGTGCCATCGACTGTTCTTGACGCCGTCTCACATATTGTTACAGCAGCGGACCAGACGGCCAGGAAGCCAATTTATCATGACAA<br/> GCAAGACCTGCAATCGATCTGGCAGTGAATGCCGCCGTAGCAACGCCTCTGGACTGGTGTTCATGAATTTATCATAGAGCAGGCAG<br/> AGAAACAACCGCGCGGTGCCATCTGCGCGTGGATGGTAATCTACGTATAAGCAACTCAACGATCTGTCCACGCAGCTGGCAGTGC<br/> CACATCCGACAACCTGGGTGTTGGGCCAGGGGTTAATGTCCCGTTGCTCTTTGAGAAGTCGCGGTGGATGTCGGTTGCCAGTCTGGCGGT<br/> CATGAAGGCTGGTGAACCATGGTGGGCTTGGATCCTGGTCCAGCTGCGAGGAGACTACGAAGTATCATCGATCAAGTCCAGCCTTGTCT<br/> TCATTTTACTTTCGGCCGAAATAGCAACAGCGCGGACGCTTTTGCATCCTGCCATGTTGTCCGGGTGGATGACGCCAGTTTGGCCAG<br/> CTGGCCACGCCGTGCAATGCTCTGTTACCCCGGTTGACCTGCCAGCAGCTATACTGGTATTACCTCTGGGAGTACAGGCGTGCCA<br/> AAGGGTGTGGCCATCAGCCATTGCAACCTCAGCACCAGGATTACTACCAAAAGCGCATCTTGAACCTTCTGTGCGCTGAGGGTACTT<br/> GAATTGCTTTCATGATTCGATGTCCTCGGGTACAATCCTTACACCTTGCAGGCTGGTGGCTGCTGCTGCGTGAAGAGTTCG<br/> GAACGCCGCGGAGATATCAGTCCGCAATGCGTCCGATGGAGGTAAGTACGCGCATCTTACTCCATCTGTTGCGCGTCTTCTGAACCT<br/> TCCAATGTGCCGCTCTCCAAACCTCGTCTTGTAGTGGAGAAGCCGTATCGCGAGCGGATGGAGCAGTGGAGCCGGCACGTCATCT<br/> GATCAACCGGTACGGCCCTGCTGAGGCCGCGTATGGGTGATATCGCACACCTCGACTCAGCATTGTCCATGCCCTCCATCGGAAAGGG<br/> GGGTGGCTGACCACGTGGATTGTTGACCCTAGTGCACCCGACCAATTAGCCCCAGTGGGCTGCGGGGTGAGCTCTGGCTGGAAGGT<br/> CCACTAGTGGGAGTGGCTATCTCACGACCCGAAACGAGCAGCGGCTTATCGAGAACCAGGATGTTGCTCCAAAGGAGCAG<br/> GAGGGCCCATGGCCCTGGCCGACAGGACGGCTTTATCGGACTGGAGACTTGGCCCGGTATACACCCGAGGGTTCGATTGTTTATATT<br/> GGGAGAAAGGATAAACCAGATCAAGATCCACGGTCAAAGGGTGGAGTTGGAAGAGGTAGAGAAATATTGAGCAAGCCATGCTAAACA<br/> GCGCCGACGACACGAGTCCCTGTGGTAGCAGCGGTGTCACCCCTCAAGGAAGCAAGAGGCAATTCTGGCAGCTTATCTGGCTCT<br/> GGGTGAGCCGGCCACGGGCTCTGTGAAATTTGCGCAAATCTCTCAGCAGGTACTGTTGGATCATCAACCCGGCCTTGGAAAGAGAGC<br/> CTGCCGACCTATATGAGCCGAGCATCTACATCCCGTGGCGGAGATCCCACGACTACCAATGGAAGGCTGACCGCAGCAAACCTCGC<br/> AACCATGGCATCAGTGCAGTCTGGCTGAATGGGCTGGCCTTCAACCTCTGAGGGCAAATGGCGCCTGTATGCTCCGGGGGAGC<br/> TGGGCTGACAGAGACTGTTGCTGAAGTGTGAATATGGACCAGAGCCTAGTAGGCATGGACGACAGCTTCTTCTGCTCGGCGGTGAT<br/> TCCATTACCGGATGACGCTGTGCGCAAGTCCCAATCCAGCCTTCTTATATACGGTGGGCGATATATCAAGCACAAAGACCGTGCAC<br/> AACTGGCAAGCAATGCAAGGCAGACAGCGACACCTCCGTGCAGCTCCCGGAAGTCCCAACAGCTGTTCCGAGCTGTCGCCGATCCA<br/> GCAGCTATTCTTTCCTCGCAGGACAAGGGCAAGAACCTGTTAACAGTCTTCTGGTCCGCGTTCGCCGCTCCCTGAATCCCAACGA</p> | <p>GVLCELSISHALIDAFTLILKQELCAAYTGLLS<br/> SSLAPLYSDYIHFIOQLPAGSAAAYWQEHLQE<br/> VKPCLFPSLGLNTEGRRSQAHIPITFERELHL<br/> ALRIFCMEHGLTVSNIFHVAWALVLRAYTGLD<br/> TVCFGYLTSGRDIPLQADGTVGPFINMLAS<br/> RVDLGSKDSLMTLVQRDQEYQNSLEFQHYH<br/> LAKIFHLIDTPEKGLFNAMSVQASDSGPKDC<br/> QSAISLVDEGGDDPTEYDIMINIGVGEDDTG<br/> CNFTFNESVIDRYAKSAIDLFLHAVSHIVQHA<br/> DQTAQEANFISKQDLQSIWQWNAAVATPLD<br/> WCVHELIIQAEKQPAAAAICAWDGNLTYKQ<br/> LNDLSTQLACHIRQLGVGPGVNVPLLEKSR<br/> WMSVASLAVMKAGGTMVGLDPGQPAGRL<br/> RSIIDQVQPLIITLTSAGNSNSAAAFASCHVVR<br/> VDDASLAQLATPCNALLPPVPASSLYLVFTS<br/> GSTGVPGVAISHNSLSTAITHQKRILKLSVAS<br/> RVLEFASYAFDVSWGTILHTLAAGGCVCVPEE<br/> SERRGDISAAMRRMEVNYAHLTPSVARLLNP<br/> SNVPLLQTLVLSGEAVSRADMEQWSRVHHLI<br/> NAYGPAEAAVWVIFAHLDSLMPISIGLVRG<br/> CTTWIVDPSPRDQLAPVGTGALVLEGLV<br/> GRGYLHDPERTAAAFIENPRWLLQAGAGAH<br/> GPGRQGRLYRTGDLARYTPDGSIYIGRKN<br/> QIKIHQRVELEEVKEYIEQAMLNSAAAPAV<br/> PVVAAVVTPQGSKKAILAAYLALGEPATGSVEI<br/> VRKLSRYTGIIINPALEESLPTMYRPSIYIPVAEI<br/> PTTTNGKADRSLATMASSRTLAEWAGLQT<br/> SEGKWRPVSSPGLGLQRLFAEVLNMDQSL<br/> VGMDDSFSLGGDSITAMQLSAKSQSLLYIT<br/> VGDIFKHKTVAQLASNARQTASTSVQLPEVP<br/> NSLFELSPIQLFFASQDKGNLNFQSRFLRV<br/> SRSLNPNELQKAIQVLAARHSMLRARFVQSA<br/> DGWVWQKIVNDSAGCYTFRSHHITLQDME<br/> PLLHSSQELLDIVQGPILAVELIDSSHGQYLF<br/> MTAHLVVDLVSWRILLGDLEEFIRSGTITGF<br/> PPFSFQSWSQLQANYARDHLPPKIALPFKVS<br/> PPRHEYWGLVPHGDANTLSDSGRSFTMN<br/> KRLTDILMGTANSFDTQPVEILHAALLYAFA<br/> QTFQDREAPPLFTEGHGREAWDSGIDLSTRT<br/> GWFTTIFPVAASITQNHSLPEVVRVVKDTRR<br/> QTPRNGWSYFTSRYLNTDGRQAFQIKGPVEI<br/> IFNYMGLYQQLERPDSLQCDIAVTAPPA</p> |
|--------------------------------------------------------------------------------------------------------------------------------------------------------------------------------------------------------------------------------------------------------------------------------------------------------------------------------------------------------------------------------------------------------------------------------------------------------------------------------------------------------------------------------------------------------------------------------------------------------------------------------------------------------------------------------------------------------------------------------------------------------------------------------------------------------------------------------------------------------------------------------------------------------------------------------------------------------------------------------------------------------------------------------------------------------------------------------------------------------------------------------------------------------------------------------------------------------------------------------------------------------------------------------------------------------------------------------------------------------------------------------------------------------------------------------------------------------------------------------------------------------------------------------------------------------------------------------------------------------------------------------------------------------------------------------------------------------------------------------------------------------------------------------------------------------------------------------------------------------------------------------------------------------------------------------------------------------------------------------------------------------------------------------------------------------------------------------------------------------------------------------------------------------------------------------------------------------------------------------------------------------------------------------------------------------------------------------------------------------------------------------------------------------------------------------------------------------------------------------------------------------------------------------------------------------------------------------------------------------------------------------------------------------------------------------------------------------------------------------------------------------------------------------------------------------------------------------------------------------------------------------------------------------------------------------------------------------------------------------------------------------------------------------------------------------------------------------------------------------------------------------------------------------------------------------------------------------------------------------------------------------------------------------------------------------------------------------------------------------------------------------------------------------------------------------------------------------------------------------------------------------------------------------------------------------------------------------------------------------------------------------------------------------------------------------------------------------------------------------------------------------------------------------------------------------------------------------------------------------------------------------------------------------------------------------------------------------------------------------------------------------------------------------------------|--------------------------------------------------------------------------------------------------------------------------------------------------------------------------------------------------------------------------------------------------------------------------------------------------------------------------------------------------------------------------------------------------------------------------------------------------------------------------------------------------------------------------------------------------------------------------------------------------------------------------------------------------------------------------------------------------------------------------------------------------------------------------------------------------------------------------------------------------------------------------------------------------------------------------------------------------------------------------------------------------------------------------------------------------------------------------------------------------------------------------------------------------------------------------------------------------------------------------------------------------------------------------------------------------------------------------------------------------------------------------------------------------------------------------------------------------------------------------------------------------------------------------------------------------------------------------------------------------------|



|                                                                                                                                                                                                                                                                                                                                                                                                                                                                                                                                                                                                                                                                                                                                                                                                                                                                                                                                                                                                                                                                                                                                                                                                                                                                                                                                                                                                                                                                                                                                                                                                                                                                                                                                                                                                                                                                                                                                                                                                                                                                                                                                                                                                                                                                                                                                                                                                                                                                                                                                                                                                                                                                                                                                                                                                                                                                                                                                                                                                                                                                                                                                                                                                                                                                                                                                                                                                                                                                                                                                                                                                                                                                                                                                                                                                                                                                                                                                                                                                                                           |                                                                                                                                                                                                                                                                                                                                                                                                                                                                                                                                                                                                                                                                                                                                                                                                                                                                                                                                                                                                                                                                                                                                                                                                                                                                                                                                                                                                                                                                                                                                                                                |
|-------------------------------------------------------------------------------------------------------------------------------------------------------------------------------------------------------------------------------------------------------------------------------------------------------------------------------------------------------------------------------------------------------------------------------------------------------------------------------------------------------------------------------------------------------------------------------------------------------------------------------------------------------------------------------------------------------------------------------------------------------------------------------------------------------------------------------------------------------------------------------------------------------------------------------------------------------------------------------------------------------------------------------------------------------------------------------------------------------------------------------------------------------------------------------------------------------------------------------------------------------------------------------------------------------------------------------------------------------------------------------------------------------------------------------------------------------------------------------------------------------------------------------------------------------------------------------------------------------------------------------------------------------------------------------------------------------------------------------------------------------------------------------------------------------------------------------------------------------------------------------------------------------------------------------------------------------------------------------------------------------------------------------------------------------------------------------------------------------------------------------------------------------------------------------------------------------------------------------------------------------------------------------------------------------------------------------------------------------------------------------------------------------------------------------------------------------------------------------------------------------------------------------------------------------------------------------------------------------------------------------------------------------------------------------------------------------------------------------------------------------------------------------------------------------------------------------------------------------------------------------------------------------------------------------------------------------------------------------------------------------------------------------------------------------------------------------------------------------------------------------------------------------------------------------------------------------------------------------------------------------------------------------------------------------------------------------------------------------------------------------------------------------------------------------------------------------------------------------------------------------------------------------------------------------------------------------------------------------------------------------------------------------------------------------------------------------------------------------------------------------------------------------------------------------------------------------------------------------------------------------------------------------------------------------------------------------------------------------------------------------------------------------------------|--------------------------------------------------------------------------------------------------------------------------------------------------------------------------------------------------------------------------------------------------------------------------------------------------------------------------------------------------------------------------------------------------------------------------------------------------------------------------------------------------------------------------------------------------------------------------------------------------------------------------------------------------------------------------------------------------------------------------------------------------------------------------------------------------------------------------------------------------------------------------------------------------------------------------------------------------------------------------------------------------------------------------------------------------------------------------------------------------------------------------------------------------------------------------------------------------------------------------------------------------------------------------------------------------------------------------------------------------------------------------------------------------------------------------------------------------------------------------------------------------------------------------------------------------------------------------------|
| <p>GCTCCAGAAGCGATTGGAGTTTTGGCAGCACGCCATTCATGCTCCGGGCTCGGTTCTGTCAAAGCGCGGACGGCGTCTGGCAGCAG<br/> AAGATTGTAACGATTGAGTGGCTGCTATACATTCGCGAGCCACCACATCACCAGCTGCAAGATATGGAGCCCCTCCTCATAGCAGCC<br/> AGGAGTTGCTGGATATTGCCAGGGTCCCATCCTGGCCGTGGAAGTATTGATTCGAGCCACGATGGGCAGTATCTTTCATGACAGCCC<br/> ATCATCTCGTGGTGGACCTTGTCTCATGGAGAATTCTGCTGGGCGATCTGGAGGAGTTCATCCGCTCGGGCACAATCACCAGGATCCCTC<br/> CATTCTCATTCCAATCATGGAGTCAACTGCAGGCGAACTATGCGCGAGACCATTGCTCCAAAGATCGCGCTGCCTTTAAGGTCAGTCC<br/> GCCCCGGCATGAGTACTGGGGACTGGTCCCTGGGCACGATGCAAACACCCTGAGCGATTCCGGTTCGAGGCAGCTTCACGATGAACAAG<br/> CGCTGACCGACATTCTCATGGGCACGGCCAACCGCCCTTGATACGCGAGCCGGTTGAGATCCTCCACGAGCCCTGCTGTATGCGTTT<br/> GCACAGACATTCCAGGACCGCAAGCACCGCCTCTTCCACCGAGGGGCTGGTTCGAGAAGCCTGGGACTCGGGCATTGACCTGTCCA<br/> GAACTGTTGGCTGGTTTACCACCATCTTCCCTGTGGCAGCTTCGATTACGCAAACCACAGTCTCCAGAGGTTGGTCCGCGGTGTAAG<br/> GATACACGCGGCGAGACACCAGCAACCGGTGGTCTATTTCACCTCGCGTACTGAATACTGAGCAGGCGAGGCTCCAGATCAA<br/> GGGCCCTGTGGAGATTATTTTAAATTACATGGGCTTATATCAGCAGCTGGAGCGGCCGATTCCCTGTTCCAGCAGTGTGATATTGCGGT<br/> ACAGCGCCCCCTGCTGCTGCGGCGACTCTCTCGCGGTTTGCCTGATCGAGCTCGCAGCATCTGTTGTGAGGGTTCAGTGAAGTTCGA<br/> GTTCTTATACAACAGGGAGATGAAAGGACAAGACAGGATACTTGAATGGATCAGCAAGACAGAATCCTCACTCAAAGCGGCAGCGGAA<br/> GAACTTCTGTTGCAGAGCCCAAGCTATACCATCTGCGACTTCCCTGCTCTCTCACCGACCAGGGTCTCGACGAGCTTCTCAATAGG<br/> GTCTCCCGGCTGTGGGTCTTCTACGCGCCAGATCGAAGACATCTACCCCTGTGCGCCGATTGAGGAGGCGCATCATGAGCCAGGCC<br/> AAGAGCCCTGAGCTCTATTGACTCGAGTGGTGGAGCGGTGAGTCAACAGGCACGTCGCCAGTGCATCTCGATCGGTTGAGGCGGG<br/> CCTGGCAGATGGTGTGAACCGTCACTCGATTTTACGCACGATATTTATGACGGTATCGGATCCGGCCAGGTGAAGGACCAGGTGGTCC<br/> TCAAGGACTTTCCGGTGGACGTCGAGGTCCCTCATGCCGAGCTGCATCAGCTCGCAGAGCCAGTCACTGGGCGTCAATGGCACACCGAT<br/> CTGTGAGCAGAAGAGACACCCCGCAGCATTCCCTGGTGTGACGCAAACAGCGTCTGGAGTCGTGTTCTGCGACTTGGAGCTCAACC<br/> ATGCGATGGTTCGATCGTATTCTTAGCCCTTTGAGGCAGGAGATCTGTGCGGCATATACTGGCTCACTGCCACACCCGCGCGG<br/> CCTACCAAGCGTATATTGAGCAGCTGCAGGGGCTGCCCTTGTGAAGGACAACGCTTCTGGCAGACATATCTTGACAACGCTCAGCCCT<br/> GTCACTTTCCGGCCCTCGGCCAGCGGATGTACAGACGGCTCGAACGCCCGCGGGGCTATCCATCTCGTTGGACGCGGCCACTCAT<br/> CAAGCCCTGCGTGTCTTCTGCCAGCAGCAGCAGTTACACCCTCGAACGTGTTCTACTGGCTTGGGGGCTTCTTCTCGCGCTACT<br/> GGCTTAGACACAGTGTGTTTCGGCTACTTACGTCGGGCGCGATGTCCTGTCCAGGGGTCGATAGGATTGTTGGTCCGCTCATTAA<br/> ATGCTTGTCTGTGTTCTGGAATTCAGGACTGGGGCATCGGTGCGATCGGCCATGCAGAAGTCCAGGAAGACTATCTCGCCGCCCTGCA<br/> GTATCAATCTACGCCTCTCAGCAAGATCTGCAGCTTCTGGGACGTCGGTTCGGGCGCTATCAATACCGGCATATCGGTCAGGGCGG<br/> TGCTACTTCCGCGAACCAGCAGCAGATGATATCATAGTACGCGATCAGACAGGCTGGATTGCGCAGAGGATGTGTTTTGTTCTTCT<br/> GTCGTGGTACGATTCCCTTTGCTCTCCATAGCTGACCCGGTCCACAGTACGACATTGCCGTTGCTATCTCCACGATGAGGAGGAGA<br/> CGGAGATTGCATTCGACTACATGGCCGTACCTTGTCGACCAAGGGGGTCAAAGCCTTGCAAGTCTTTTTGTTCAAGTTGTGCTGAT<br/> GTCATACGTGCTCCGGATCAAACGGTCCAGGCTGTCAATGTGATCAGCAAGGAAGACCTCCAGAGTCTGTGGACCTGGAATCGAACGT<br/> CCCGGAAACCGTACAGGCGTGTTCATGATATGATTGGACAAAAGCCTGTGATAGCCCTGATCCCGGCAATCCATGCATGGGATGG<br/> CGCGCTTACATATCAAGAGTTGGACCTTCTGTCCACCCGACTGCCCGGTTATATAGACTAGGGGTCGGCAGAATACAGCTCACCCT<br/> CTATGTTTCCAGAAAGTCCATGTGGATGCCGTTAGCTGCACTGGCAGTGTGATGAAGACAGGCGCTGATGCGTGGCCATGGATATGACCCA<br/> GCCAGAGAAGCGCTGCAGGCGATTGTGGACCTGGTGCAGCCGATCTTCTCGTGCATCCGTCGCAAATCGAAGACCGTCCAGCAA<br/> CTGGCAGACACGAAGGCCGTGTTGGCGATTGACCAGGCATTCTTTCCAAATCGCACCTCCACGTCGCTGCTGCGACAGTCTCC<br/> CCATCAAGTCTCTCTATACCGTCTTTACATCTGGCAGTACCGGCACACCAAGGGAGCAGTCACTAGCCATGCCAACTTTGCCAGTGCCA<br/> TTGTGCATCAAACGGACCTGCTCGCACTGGACCCGATTGCGCGCTTTGACTTTGTCTCGTATGCCCTTGTGTTTCTGTTGCGAACCT<br/> ACTCCACAGCTGCGCGCTGGGGCATGTTTGTGCATCCCCTCCGAAGCATGCGCCGGGACAACCTGTGAGGCCATGACAGGCGATG<br/> AAAGTGACCATGCCAATTTACCCCGTGCATGGCCGTACAGTGGACCCGGATCAATGCAAGACGCTCAAGGCCTTGATCTGGGCGG<br/> CGAGGCCATGTCCAGCACGACATCGCTGTCTGGGACCTTGGGTTGACCTTCTGTTGCGTATGGTCCGCGGAGTGTACGGTTGCCG<br/> CCGTCATGGACACAGTCCCTGAGCAGTCCGGACATCGGACTTCCGGAAGATAGGGCGGGGCTTGGTTGGAACACCTGGATTGTCAG<br/> CGTATCGGATGGAGAGCGCCTGGCCCGGTGGGCACTGTGGGAGAGCTGTGGCTGGAAGGGCCCTGGTGGGCTGGGCTATCTTGA</p> | <p>AATLSRFALIDVAASVVQGLKFEFLYNREMK<br/> GQDRILEWISKTESSLKAEEELLQSPSYTIC<br/> DFPLSLTDQGLDELLNRVLPVGLSYGQIEDI<br/> YPCAPIQEGIHMSQAKSPELYWTRVRWTVQS<br/> TGTSPVDLRLRRWQMVVNRHSILRTIFID<br/> GIGSGQVKDQVVLKDFPVDVEVLHAEHLQL<br/> AEPVTGRQWHTDLSRRDTPQHSLVLTQTAS<br/> GVVFCDELNHAMVDAYSLLLRQEICAAYT<br/> GSLPATPAPAYQAYIEHLQGLSLVEGQRFWQT<br/> YLDNAQPCHPALGQPDVTDGSNARRALSIS<br/> LDAATHQALRVFCQHAVTPSNVFLAWGL<br/> LLRAYTGLDTCVFGYLTSGRDVPVPGVDRIVG<br/> PLINMLVCVLEFRTGASVRSAMQKVQEDYLA<br/> ALQYQSTPLSKILQSGTSGRGLFNTGISVQG<br/> GATSGEPDEHDIIVTDQTGLDSPEYDIAVAISH<br/> DEEETEIAFDYMAVTLSDQGGQSLAGLQVQV<br/> VADVIRAPDQTVQAVNVISKEDLQSLWTWN<br/> RTVPETVQACVHDMIGQKACDPSDPAIHA<br/> WDGALTYQELDLLSTRLARYLIDLGRQNTAI<br/> PLCFEKSMWMPVAALAVMKTGAACVAMD<br/> MTQPEKRLQAIVDLVQPDLLVTSVANRKTQV<br/> QLADTKAVLAIDQAFSQAIPPTSSCLPTVSPS<br/> SPLYTVFTSGTGTGPKGAVISHANFASAIHQ<br/> DLLALDPSRVDFVSYAFDVSWSNLLHTLA<br/> AGACLCIPSEAMRRDNPVEAMQAMKVTHA<br/> QFTPSMARTVDPDQCKTLKALILGGEAMSQ<br/> HDIADVWAPVWDLRVAYGPAECTVAAVMDT<br/> VPEQSGHRDFGKIGRGLSNTWIVSVSDGE<br/> RLAPVGTGELWLEGLVGLGYLDQDEKTA<br/> SFIDNPAWLLRGGPGVPRGRRLYRTGDLVR<br/> YCFDGSILFLGRKDNQVVRGQRLVQEV<br/> HLQAHLSGTTGVVADVVKPQSSNAMLVAY<br/> LAVGETIHSPLDSVHAALRPLTQGLTDSLARI<br/> PQYMVPSMYLPVAEIPVTTTGKIDRKLHEL<br/> GSSLTMEQLAQIQPPQEGEQAPQTDLEKLL<br/> QQLWAELS AKLRSAGFRIAPVDFIKLTISR<br/> PSAASVQGRMKTTWETREDEFELAPVQ<br/> MFVNVVRRKCNHFNQSFLLRITRQVRAEDV<br/> RRALDLIVTQHPMLRRAFASDQGGHWTQHI<br/> KPYTPGCRYCEHVESLAEASPLLDASQVAL<br/> DLESGPVFSGDLLQIRDSGDQYLYLVAHHLAV<br/> DLVSWRIILADMEDHLTAKASSFTPMFPQA</p> |
|-------------------------------------------------------------------------------------------------------------------------------------------------------------------------------------------------------------------------------------------------------------------------------------------------------------------------------------------------------------------------------------------------------------------------------------------------------------------------------------------------------------------------------------------------------------------------------------------------------------------------------------------------------------------------------------------------------------------------------------------------------------------------------------------------------------------------------------------------------------------------------------------------------------------------------------------------------------------------------------------------------------------------------------------------------------------------------------------------------------------------------------------------------------------------------------------------------------------------------------------------------------------------------------------------------------------------------------------------------------------------------------------------------------------------------------------------------------------------------------------------------------------------------------------------------------------------------------------------------------------------------------------------------------------------------------------------------------------------------------------------------------------------------------------------------------------------------------------------------------------------------------------------------------------------------------------------------------------------------------------------------------------------------------------------------------------------------------------------------------------------------------------------------------------------------------------------------------------------------------------------------------------------------------------------------------------------------------------------------------------------------------------------------------------------------------------------------------------------------------------------------------------------------------------------------------------------------------------------------------------------------------------------------------------------------------------------------------------------------------------------------------------------------------------------------------------------------------------------------------------------------------------------------------------------------------------------------------------------------------------------------------------------------------------------------------------------------------------------------------------------------------------------------------------------------------------------------------------------------------------------------------------------------------------------------------------------------------------------------------------------------------------------------------------------------------------------------------------------------------------------------------------------------------------------------------------------------------------------------------------------------------------------------------------------------------------------------------------------------------------------------------------------------------------------------------------------------------------------------------------------------------------------------------------------------------------------------------------------------------------------------------------------------------------|--------------------------------------------------------------------------------------------------------------------------------------------------------------------------------------------------------------------------------------------------------------------------------------------------------------------------------------------------------------------------------------------------------------------------------------------------------------------------------------------------------------------------------------------------------------------------------------------------------------------------------------------------------------------------------------------------------------------------------------------------------------------------------------------------------------------------------------------------------------------------------------------------------------------------------------------------------------------------------------------------------------------------------------------------------------------------------------------------------------------------------------------------------------------------------------------------------------------------------------------------------------------------------------------------------------------------------------------------------------------------------------------------------------------------------------------------------------------------------------------------------------------------------------------------------------------------------|

TCAGGACGAAAAGACTGCCGCCAGTTTTATAGACAACCCTGCATGGCTCTCCGAGGAGGTCTGGTGTCTGGTCGTAAGGCCGGT  
TGACCAGAACTGGGGATCTTGCCGCTACTGTTTTGATGGCAGTATTCTCTCTAGGACGCAAGGATAACCAGGTCAAAGTCCGCGGGC  
AGCGTGTGAATTGCAAGAAGTGGAGCATCATCTCCAGGCTCATCTGTCCGGAAACACCGGAGTCGTGGCCGACGTTGCAAGCCCA  
GGGACGAGCAATGCCATGCTCGTCGCTATCTCGCGTTGGAGAGACTATCCATCCCTCTAGACAGCGTCCATGCAGCATTGCGGCC  
CCTCACCAAGGCCTACGGACTCCCTCTCTGCCGAATCCCGCAGTATATGGTCCCTAGCATGTACCTCCCGTTGCAGAGATTCCAGTC  
ACTACGACGGGAAAGATCGATCGAAAGCAGCTGCATGAATTAGGATCATCGCTTACAATGGAACAGTTAGCTCAAATCCAACCCCCAG  
GAAGGCGAGCAGCAGGCTCCCGAGACAGACCTCGAGAAGCTCTCCAGCAGCTCTGGGCAGAGGTCCTCAATATCAGTCAAGAACTCA  
TTGGGATGCACGATAGTTTTCTTTCCCTCGGGCGACTCAATCACAGCGATGCAGCTATCGCCAAGCTGCGCTCAGCAGGCTCCGAT  
CGCCGTTCTGATATCTCAAGCTGAAGACAATCTCCGACTGGCTCCAAGTGCAGCATCTGTGCAGGGCGGGATGAAAACCCACCTGGG  
AGACCCGAGAAGACGAGCCATTGAACTTGCTCCGTTGAGCAGATGTTGCTCAACGTGGTGCAGCCGAAAGTGAATCAATTTAACCAG  
AGTTTCTCTGCGCATCACCCGTGAGGTGCGGGCTGAGGATGTGCGGGAGCCCTGGACTTGATTGACTCAACATCCTATGCTGAG  
GGCAGGTTTGCTCGGATCAGGGCGGACATTGGACGAGCATATCAAGCCCTACACCCCGTTGCTACCCGTTACTGCGAACACGTCG  
AGTCTCTCTGGCCGAGGCTCGCCGCTGTTGGATGCCAGCAAGTCCCTTGTGACTGGAATCTGGACCGGCTCTCTCTGGGGATCTGC  
TCCAGATTCGCGACAGCGGTGATCAATATCTGACTGTTGGCGCATCACTTGGCGGTGATCTGGTATCTCGGAGAATCATTCTCGCG  
ACATGGAGGACCACCTGACAGCAAAAGCCTCTCGTCTTTCACGCCGATGCCCTTCCAGGCATGGTGTCAACTTCAGGCCGACCATGCTC  
GAGACTGCCTACTCCGAAACGGCGTTGCCGTTGAGATTCTCTCCGAGCAGGGTTACTGGGGAATTGATCTGAAACGCAACACC  
TTTGCAACGCCATCCACCGCAGCTTACAGTGAGCAAAGACGTACAGATATCTCTTGGGGCCTGCCAATAAGTCATTTGATACCCAG  
CCGGTCGAGATTCTACAGGGTGTCTTGATATACTCTTCACTCAAGTGTTCGGGATAGGGCGCCTCTACAGTGTTCAGCGAAGGGCAT  
GGGCGAGCCATGGGATGCCGCGATCGACCTATCAAGAACAGTTGGCTGGTCACTACTATGCTCCGACCGTAACCTCGATGGGACC  
GGATGATACTTACTGATATCATCGCCATACGAAAGATAACCGACGTCTAGTGCCAGGAAACGATGCCATACTTTGCATCCCGCTAC  
TTGAACCTGCTGGAAAGAAGGCATTTGGGCCTACGGTCTGCCGAGATCACATTCAACTTGGGACTTACAGCAGTTTGAAAA  
AGACAGTCCCTGCTTACGCCAACCGCTTGCCCTCAGGCAGCATGTCGGATGTTGACGAGCGGATGCAGCGCTTTGCCCTGATTGAGG  
TTTCTGCATCGGTGTCCAGGGCTGTCTGGAGTTAGCTTCTTGTTCAGTGTGCATACAAAGCACTTGCCTAACCTTGAGGACTGGGTGG  
CCCCTGTCAGCATGCTCTACGAACGGCTTCGGAAGTCTTGATGCAGCGCCAGCAAGCTATACAGATGTGATTCCCACTTATGCGCT  
GACAGAGCCAGCCTGCAGACTCTGTTGGATATAGTCTTCCACAGCTCGGAGTCTCGTATGGTCAAGTTGAGGATATCTACCCTGCTC  
GCCGATTAGCAGCGTATCTTGTGAGCCAAAGCAAGAACCTGGCGTATTGGACGCGCATTGATGGAAGGCCCGGCTCTCCGAGT  
CTGCATTGCCTCCAATCCTGAACGACTAGCCGTGCTGGATGAGGGTCTGTCAGGACATCCCGTCTTCCGACCCGTTTCATCGATG  
GCCTTCTCCAACAGCGTGAAGATCAGCTTGTCTTGAAGCCAGCGAGCCGAGATACATGTGATATCTGGTCCGGAGGCGACAGAT  
CCCATCGCGGCTTACTGCTTACTGGGAGCAAAGACAGCGGAAAGGACACAAGCTTCACTTCTCTGCTCCTCAGCCAGGCACCCTCCGG  
CGAGGTCTTCTGTGACCTGCAATGAACCATGCAATCACGGATGCCACTTCGACTGCTTACTCAAGCGAGACCTTCAAGCCGCATACAC  
TGAACCCCTCCGACTATGCCGGTCTTCGTACAGCGATTACATCAGGCACATTAAGCAATACCCGCGGAGGTGGGGATAGACTACTG  
GCGACGGTATCTCGACGGGCTTCCATCCCTGCAATTTCCCAACTGGCAGCAATGGCCAGGACTGGGGGAGAATCCAAGAGGCTCC  
ATACATCATATGCTCGATCAAGACAGCAATACAGTCTTCAAGTTTTTCTCAAGACGAACGAGCTGACCGCTCAACGTCTTTTACCTCG  
CATGGGCCCTCATTCTCGGTGCTTGTGGGTGCGAGACAGTGTGCTTGGTATCTAGTATCCGGTCTGATGTCCTATTGACAATGC  
AGACAGGATAATCGGGCCGTTTATTAACATGCTGGTCAGCCGAGTTAGGCTAGGAGAGGGGGTCACTCTGATGGATATCATGAAGCAAA  
GCCAGGCGGATTATCTGGACAGTCTCAAGCACCAGCATCGCTCTGTGGCGCAGGCCGCTCACTCTCGGACGGCCAGCCGAGCCTCTA  
TTAATAGCGTCATCTGGTCAAGGTATGGATCTGAAGAAGAGCAGCAAGAGTGAAGAACGTGGTCTCTGTCTTGAGGAGCAAGACG  
GTAACGATCCAACAGAGGTACGTATCCCATCCCTTACACATGCATTTGTGGACAGCTTCCCTAACCTGGTATTCCAGTATGATATCA  
TGATGAATATTGGTCTGGGGGACCAGGAAACAGCAATGACGTTACGATATACAAGTCCCTGTATCGGAGCAACAGGCAAGCGGCATA  
GTGGAGTCCCTGCTTCAAGCGGTCCGGGAAATCATCCACATCCCTTCAAGAAGCCCTCCAGGTGAATCTGTCAACGGGCCATGACCA  
GCAGACTATCTGGAGCTGGAACGCTCCGTCGCCCAACAATCAACGTTCCAGTGCAGGCTGATTGCAACAAGGTGAAGGAGCAG  
CCCGATGCCGACGCAATCTGCGCATGGGATGGCGAGTTGCTGACGGGACGCTAGATAGCTTATCAACATGCCTGGCCATCATTGGTG

WCQLQADHARDCLTPETALPVEIPPPQQGY  
WGIDPERNTFGNAIHRSTVSKNVTDILLGPA  
NKSFDTPQVEILQGLIYSFTQVFRDRAPPTV  
FSEGHGREPWDAIDLSTVGVWFTMLPTV  
TSMGPDDELPIRHTKDNRRLLVPGNGWPY  
FASRYLNPAGKAFGAYGLPEITFNLYGLYQQ  
FEKSSLLQPTALPSGMSDSDERMQRFFALI  
EVSASVSQGCLEFSFLFSRHTKHLRNLEDWV  
AHCQHALRTASEVLMQRQPSYTRCDFPLMR  
LTEPALQTLVGYSLPQLGVSYGVQVEDIYPCSPI  
QHIGILLSQAKNPGVYWTRIRWKARSSSALP  
PNPERLARAWMRVVARHPVLRTRFRIDGLSP  
NSVQDQLVLRKASEPEIHVISGPEATDPIAALD  
SYWEQRQRKGKHLHSFVLSQAPSSEVFCDL  
EMNHAITDATSTALLKRDLOAAYTELPTMP  
GPSYSDYIRHIQAIPEAVGIDYWRRLDGVHP  
CIFPTLAANGQDVGENPRGSIHMLDQDTN  
TSLQVFLKTNELTASNVFYLAWAILRDFVGE  
TVCFGYLVSGRDVPIDNADRIIGPFINMLVSR  
VRLGEGVTLMDIMKQSQADYLDLKHQHSR  
VAQAHSDDGPAEPLFNSVISVQGMDLKSS  
KSEERGLCLEEQDGNPTPEYDIMMNIIGLD  
QETAMTFSSYKLLSEQQASGIVESLLQAVREI  
IHTPFKPSQVNLSTGHDDQTIWSWNASVP  
PTINVPVHGLIANKVKEQPDADAICAWDDEL  
SYGQLDSLSTCLAHLVASGVCSDTVVPPLCFE  
KSMWMPVAMLAVMKAGGASVSMASLPE  
ERLRTIAKQTEPAVILCSEATSEKAGRLGAPRVI  
TVGQRLLSGLTIPSRGTTLPKVPDPSDRLYVTFT  
SGSTGIPKGMITHANMSSALVQQQEALSF  
GPHVRVDFVSYAWDVAVSNLLRLLVAGGC  
LCVPSDSQREGIEKAMTQLRINCVTLPVSA  
RLLNPAAVPHLNTLALIGEPLSQADIMRWAP  
HTNEIINTYGPSECPACVTVNRIPLDLLYEPNL  
GAASACNTWIVDPDNTDQLVPVGGIGELWL  
EGPLIGLYLGLPERTAESFVENPRWLRSGYA  
GQLGRGRRLYRTGDLVRYTDDGALVYIGRKD  
SQVKIRGQRVELGEIEYQIREGIARISSATGDP  
TVVAGVITPRGSGSKMLVVYLGGLQMATGP  
VDRIREALAGYTSGLDVYLSNLPHYMIPNAY  
IPVSEIPMTVTGKTRDRGLARTGASYLTELTA  
EMQPSRGRQRPTTAMERRLQQLWAAVLG

|        |                                                                                                                                                                                                                                                                                                                                                                                                                                                                                                                                                                                                                                                                                                                                                                                                                                                                                                                                                                                                                                                                                                                                                                                                                                                                                                                                                                                                                                                                                                                                                                                                                                                                                                                                                                                                                                                                                                                                                                                                                                                                                                                                                                                                                                                                                                                                                                                                                                                                                                                                                                                                                                                                                                                                                                                                                                                                                                                                                                                                                                                                                                                                                                                                                                                                                        |                                                                                                                                                                                                                                                                                                                                                                                                                                                                                                                                                                                                         |
|--------|----------------------------------------------------------------------------------------------------------------------------------------------------------------------------------------------------------------------------------------------------------------------------------------------------------------------------------------------------------------------------------------------------------------------------------------------------------------------------------------------------------------------------------------------------------------------------------------------------------------------------------------------------------------------------------------------------------------------------------------------------------------------------------------------------------------------------------------------------------------------------------------------------------------------------------------------------------------------------------------------------------------------------------------------------------------------------------------------------------------------------------------------------------------------------------------------------------------------------------------------------------------------------------------------------------------------------------------------------------------------------------------------------------------------------------------------------------------------------------------------------------------------------------------------------------------------------------------------------------------------------------------------------------------------------------------------------------------------------------------------------------------------------------------------------------------------------------------------------------------------------------------------------------------------------------------------------------------------------------------------------------------------------------------------------------------------------------------------------------------------------------------------------------------------------------------------------------------------------------------------------------------------------------------------------------------------------------------------------------------------------------------------------------------------------------------------------------------------------------------------------------------------------------------------------------------------------------------------------------------------------------------------------------------------------------------------------------------------------------------------------------------------------------------------------------------------------------------------------------------------------------------------------------------------------------------------------------------------------------------------------------------------------------------------------------------------------------------------------------------------------------------------------------------------------------------------------------------------------------------------------------------------------------------|---------------------------------------------------------------------------------------------------------------------------------------------------------------------------------------------------------------------------------------------------------------------------------------------------------------------------------------------------------------------------------------------------------------------------------------------------------------------------------------------------------------------------------------------------------------------------------------------------------|
|        | <p>GCTTCTGGAGTCTGTTCCGGACACGGTGGTTCCTCTCTGCTTTGAAAAATCCATGTGGATGCCGGTGGCCATGCTCGTGTGATGAAAGCC<br/> GGTGGTGTCTCAGTCTCCATGGACGCGAGCCTGCCAGAAGAACGATTGCGCACAAATCGCAAAGCAAACGGAGCCCGGGTGTATTCTCT<br/> GCTCGGAAGCAACCAGCGAGAAGGCGGGTTCGACTTGGTGCCCCCGAGTGATTACTGTGCGCCAAAGTTGCTCTCAGGGCTGACGA<br/> TCCCCAGTTCGAGGACGACGCTCCCCAAGGTCGATCCATCTGACCGATTATACGTGACTTTACATCCGGCAGCACGGGGATTTCCAAGG<br/> GAGTCATGATCACGCATGCAAACATGAGCAGCGCCCTGGTCCAGCAGCAGGAGGCCCTCTATTCCGGCCTCACGTCCGCGTCTTTGAT<br/> TTTGTGCTACGCGTGGGACGTGGCTTGGTCCAACCTGCTCCGTACTTTGGTTGCTGGTGGCTGTCTGTGTGCCATCTGACTCCCAGC<br/> GCCGGGAAGGGATTGAAAAGGCCATGACACAATTAAGAATCAACTGTGTTACTCTCACACCCAGTGTGCTCGTCTGCTCAACCTGCT<br/> GCGGTGCCGACCTGAATACCCTGGCTCTAATTGGGGAGCCCTGTGCGAGGCCGATATCATGCGTGGGCTCTCACACCAACGAGAT<br/> CATCAACACCTACGGCCATCCGAGTGTCTGTCATGCGTACGGTGAATCGCATCCCGCTGGACCTTTGTATGAGCCCAATCTCGGGGC<br/> GGCTTCTGCTGCAACACTTGATTGTGGATCCCGATAACACCGATCAGCTGGTCCAGTTGGTGGTATCGGAGAGCTCTGGCTGGAAG<br/> GGCCCTCATTGGGCTTGGATACCTGGGCTCCCGAACGAACGGCCGAGAGCTTTGTGAGAATCCCGCTGGCTGCGCTCCGGGTAT<br/> GCTGGACAGCTGGGGCTGGCGCCGGCTGTATCGCACCGCGACCTGGTCCGTACACCGATGATGGCGCGCTTGTATATTGGACG<br/> CAAGGACTCGCAGGTCAAGATCCGCGGCCAGCGCTGGAGCTGGGAGAAATCGAGTACCAGATCCGCGAGGGCATCGCGCATCTC<br/> GTCCGCCACCGCGATCCACCGTGTGGCTGGGGTTATTACTCCGCGCGGAAGCGCAGCAAGATGCTGGTGTCTATCTTGCCCTAG<br/> GGCAGATGGCCACAGGCCTGTTGACCGCATTGAGAGGGCTGTGGCGGGCTATACAAGCGGGCTGGATGTGTATCTCTCGGAGAACCT<br/> CCCCACTACATGATCCCAATGCATACATCCCGTCTCTGAAATTCATGACAGTGACCGGCAAGACGGACCGCGGACGCTGGCCCCG<br/> TACCGGGGCATCATAACCCCTGACCGAATGGCCGAGATGCAACCCCTCGCGCGGCAGGCAGCGGCCCTACCACCGCTATGGAGCGG<br/> CGGCTCAAACAGCTTTGGGCGCAGTCTGGGGCTCGATGTCAGTGCCATCGTCCGATGACAGTTTCTCCGATTGGCGGGGATT<br/> GATTGCGCGCATCCGCTGGGCCAACGTGCGAGCGAGGATGGTCTGGCCGTGGCCGTGGCCGACATCTCCGCAAGCCCCGTCTCTGC<br/> GATCTGGTCTCTCTCGTGTGAGGACAGGTACCTACCTTGATCCTTCTCCCTTCTCCCTTCTCCCTGCGGTTCTACCTCGGACTACGT<br/> GACAGTGGTCTCAGTCCGCTCCTGGACTGCCACAGCACACATCGCCGACGCTATCCACACCGGACCTCCAGAGCATCTACGCATC<br/> CTTTCAGTGAATGCATCGGGGGGAGATCGAGTACATCTACATGGACCTTCTCAGGGGGTGGACATCGCACGCTCCGCGCAGCT<br/> GTCTGGATGTGGACCATCTCGACATCCTTCGACCGTTTTATTCTTGTGATCAAGGTCGTCTATTGCAAGTCGTCTCAACAACGTGGA<br/> GCCCCGAGATTACCATGCAACACACCGAAGGGGATCTGGCAGCAGCATGCGAAGAAGCCTACAGCTGTGATCTACATGAGTCGCTGAGC<br/> CTGGGCCGGTCTTACGCGGTTCTTCATCACTCCACCGCAGACGGTTCGAGTGCATTACCATCCGGCTCTCTCACGCTCAGTACGAC<br/> GGCTACAGTCTGCCTGTCTCTCCGCTTTGCGGCTTCTATGAGGGCCAGACACCACCCAGCCCCGAAGTTTTCGGGCTATATCC<br/> GCCACATGCAAAGCAGCAAGAGGCCGCTATCCCTACTGGCGCACGCTTGTGAAGGCTCGTCCATCACCCGGACAGACACCTCTCC<br/> ATAGCCGATGGCCACTGTCTGCCAAACAGCCCCGTGGCCGGCTGGTTCAATCCAAGACCGCTGTGCCTGCCCGTCAGATCAACCGGG<br/> ATTACGTCGGCAACGGTCTTTACCACCTCTGTGCTCGCATGCTGGCACAGATGACAGGCGTCAGCGACGTGGTCTTTGGGACCATTGT<br/> CTCCGGCCGTTCTCTTACCAATCGCCCTCAAACAGTCCGCGGGCCATGTGTCAACACCATCCCGTCCGCGTGCAGATCGAACCCGA<br/> CCAGCCACTAGAGGAGCAGCTGGCCAGCGTCCACGACCAACATCCAGGGCATGCTTTTGAGACGAGCCAGTTACGCGACATCGCC<br/> GCCACAGCACCACTTGGCCCGAGGACTCGCGCTCCGACCTGGTTGTTTCAGTCCAGAACCTGACAACCTGGAGCATGACAAGG<br/> GTACGGAAATCCAGGGGATAGGCAGTACACTTGCACCGTGGGAGCAGCGGAACCGTCCGTTGGACAGCGATTCTCTTTATTCTGGC<br/> GAAGCCGGTGAAGAAGCCTGGGAGATATCGGTGTGCGGAGCTCTAAGGTATACACCCAGGATACTCTGGATGCCATGCTCAAGGCC<br/> TGTGTTGTCATGTTGAGAATGTTTAA</p> | <p>LDVSAIAADDSFFRIGGDSIAAIRLQRASED<br/> GLAVAVADIFRKPRLCDLALLAREDDQVYLDP<br/> SPFSLLPAGSTSDYVTAGLSPLLDPCQHIIAD<br/> VYPTTDLQSIYSAFVNAHRGEIYIYMDLPQ<br/> GVDIARVRRSCLDMWHHLDIRTVFILDQGR<br/> LLQVVLNNVEPEITMQHTEGLAAACEEAYS<br/> CDLHESLSLGRSFRFFITSTADGRVRFIRLSH<br/> AQYDGYSLPVIFSVFAAFYEGQTPPPAPKFSG<br/> YIRHMQKQEAAYPYWRLLQSSITRRLH<br/> SIADGHCLPNQPRGRLVQSKTAVPAPSDQPG<br/> FTSATVFTLCLARMLAQMTGVSVDVFGTIVS<br/> GRSSLPIALQNVAGPCVNTIPVRVQIEPDQPL<br/> EEQLASVHDQHIQGMFSQSFSDIAAHSTT<br/> WPEDSRAPDLVQFQNLNLEHDKGTEIQG<br/> IGSTLAPWEQRNRSVDSDFLILAKPVEEAW<br/> EISVSASSKVYQDTLDAMLKALCLHVENV</p> |
| ungB'' | <p>ATGTACCAGCCAAGTGGGTGTTCTGATCGGGTGGCGATATTCGAGATCGGATCTCTGGTGTGCGGAGTGTCTCCAGCTCGGGTGC<br/> CCTGATTGCGGGCCGAGCATCTCAGGACTGGGCGTGGCAGCATCAACGCCGCGCTGTCTGTGATCGTACCAACACCATCTCTGTGC<br/> GAAAGCGGCCGATCTACTGGGCTGTCTGGGGTGTGTCATGGGCTAGTACGCTGTGCGGGCCATTGTGAGCTCATCTCCGTGCAACC<br/> ATAATCCACATAGATCGGGGGCTAATGCCGTGTGACGAACAGGATTGGGGGTTTGTCTGACGGACCATGCCTCGTGGCGATGGTGTCT<br/> ATCTCAATCTGCCATCGGAGCAATACCATCTGGGCATATTTCTTCTGTGCGGTAACCAACCCCGTCCGGACATCTCAGCTGGAG<br/> GGAAAACTTCAAGTCCATGGATCTTCTGGGCTCGGCTTCTTATTCTGGGATCGTACGCTTCTGCTAGCCCTGGAATGGGGAGGGT<br/> ACAGTATGCCTGGGACAATTGGAGGATCATCTTCTTCTCATCTGTCGCGCATCTTGTGATCGTCTTGGCGGCTTTCAGATTCCGCGC</p>                                                                                                                                                                                                                                                                                                                                                                                                                                                                                                                                                                                                                                                                                                                                                                                                                                                                                                                                                                                                                                                                                                                                                                                                                                                                                                                                                                                                                                                                                                                                                                                                                                                                                                                                                                                                                                                                                                                                                                                                                                                                                                                                                                                                                                                                                                                                                                                                                                                                                                                                                                                                                   | <p>MYPAKWVFLIGVAIFEIGSLVCGVSPSSGALIA<br/> GRSISGLGAGSINAGAVVIVTNTIPVRKRPIYL<br/> GCLGIGLLTDHASWRWCFFYLNLPIGAITILGI<br/> IFFLSANQPPSGHLSWREKLQSMDDLGSAFFI<br/> PGIVTLLALEWGGSQYAWDNWRIILLFILSAI<br/> LLIVFAGVQIRAPQKATLPPRLVSNRNLGLI<br/> GYIVGNSGGLFVYYLPIWLQAIKGFSAKS</p>                                                                                                                                                                                                                                                                                                                              |

|        |                                                                                                                                                                                                                                                                                                                                                                                                                                                                                                                                                                                                                                                                                                                                                                                                                                                                                                                                                                                                                                                                                                                                                                                                                                                                                                                                                                                                                                                                                                                                                                                                                                                                                                                                                                                                                                                                                                                                                                                            |                                                                                                                                                                                                                                                                                                                                                                                                                                                                                                                                                                                                                                                                                                       |
|--------|--------------------------------------------------------------------------------------------------------------------------------------------------------------------------------------------------------------------------------------------------------------------------------------------------------------------------------------------------------------------------------------------------------------------------------------------------------------------------------------------------------------------------------------------------------------------------------------------------------------------------------------------------------------------------------------------------------------------------------------------------------------------------------------------------------------------------------------------------------------------------------------------------------------------------------------------------------------------------------------------------------------------------------------------------------------------------------------------------------------------------------------------------------------------------------------------------------------------------------------------------------------------------------------------------------------------------------------------------------------------------------------------------------------------------------------------------------------------------------------------------------------------------------------------------------------------------------------------------------------------------------------------------------------------------------------------------------------------------------------------------------------------------------------------------------------------------------------------------------------------------------------------------------------------------------------------------------------------------------------------|-------------------------------------------------------------------------------------------------------------------------------------------------------------------------------------------------------------------------------------------------------------------------------------------------------------------------------------------------------------------------------------------------------------------------------------------------------------------------------------------------------------------------------------------------------------------------------------------------------------------------------------------------------------------------------------------------------|
|        | <p>CCTCAGGGTAAAGCGACTCCCCCTCGCCTGGTTCAAATCGGAATATCTGGGTCTTATCGGCTATATTGTTGGTAAACAGTGGGGG<br/> TTGTTTGTCTTTGTGTACTATGTATGTTCTCGACTGGATCCCCCCCCCCCCCTTTCCCTAGCTGGAATCTCCGCAACATGGCTTAACG<br/> ACTTCGTACCTTGACATAGCTGCCAATTTGGCTCCAAGCCATCAAGGGGTTCTCGCCTCCAAGTCAAGTCTTTCAATCTTACCCACCA<br/> GTTAGGGGTGGTGATTGCATCTAGCTGGCGGGGCTTAGTCACTTCGTCGGATACTACACGCCCTTTCTGATTATATCTCCCTAATGG<br/> CCGTCGCTGGCGCCGCATCTGAGCTCCCTGCATCCGTCCTCAGCCTCGCAAGCATCTGGGGTACCAAGTGGTGCTGAGTCTGGGC<br/> ATCGGGCTTGGATCGCAGAACGCCATGGTCGTGCCGTCGTTGGCGCCCGGACGATGTAGTCACGGCCATTGGCATGCTGTCT<br/> CCTGCAGATGCTGCCAGCTCGGTCTGTCCATTGGACAGACAGTTTTCCACAACCGGCTGGTGGCAATTTGCATCGCAGCGCCCC<br/> GTCCGTGGACCCCTCCCTCGTTGAAGAAGGGGGCAGCTGCTCCGCATCGCGTTCCATCGGAGCTTTTGGCGTCTGTTCTTGGGGCGT<br/> ATAGCAAGCTGTCTCGCAGACCTTTACGTGGGGTGGCCATGTGTGCGCTGTGCTTCTTGGGTCGGCCTCCATGCAGTGGGAAGCGA<br/> GTCCCTGGCAAGAAAGATGCGGCAGAGGAGGAGAAGGAGGAAGTGTGCGCGACAGTGATACCCCTGCACCACCTGCGACAGAAGA<br/> GAAGACGTGAAGCAATAGAAGGGCGTGGGTGTATACCTTGCATCCCCCATGTGTGTTCTGA</p>                                                                                                                                                                                                                                                                                                                                                                                                                                                                                                                                                                                                                                                                                                                                                                                                                                                                                                                                                                  | <p>GLSILPTQLGVVIASLAGGVLVTFVGYTPFLII<br/> SSLMVAVAGILSSSLHPSSSLASILGYQVVL<br/> GIGLGSQNAMVVPVVCAPDDVVTAIAMLC<br/> FLQMLSSVALSIGQTVFHNRLVANLHRSAPS<br/> VDPSSLVEEGATLLRDRVPELPSVLGAYSKAV<br/> SQTFYVGVAMCALSLGASMQWKRVP GK<br/> KDAEEEEKEESRSDTPAPPATEEKCKQ</p>                                                                                                                                                                                                                                                                                                                                                                                                                                        |
| ungC'' | <p>ATGACAGTGACAGTACCGCAGGATCTCCGGCTGGGAGAGCCATATGGTATCGTGCAAACAGTCTGTTGGTCCAATCCCAACATGGGC<br/> GGACATGGTCGATTTGGGCAGGAAAGGCGCAGATGAACCACGGCTATCCACGGTCCATTGTGCACCCTGATATCCGTCTGGTAAGGC<br/> CCTTGGCTTTCTTTGATCTCGTTCAGCTGGGGCCACCCGATTGGCCCTGATACTGACGATGATGATGTTTGTCTTCAAGCTCAGTTC<br/> CGCAATCTGGCCAAGGTCCGCGACGACAAAGAATGCACCGATGCTTCCCTTCTATTGTTCTCTGGTGCCCGGACGGCGCTTTCCTGCAA<br/> ACAGTATATCTCCATCTCGCGCAGGCCACGGATCGGCCAACCTCGCCGATTCGATCCGGGTGTACGTGGTGGACTTCAAGTGGTCTT<br/> GTGTCGTGACCATCACGCTGCTACTCGTCTGGATCAACCTTTATGCCGCTCTACCCAGTGCGGCTTGTGCGGATGCTATGCGT<br/> TGGAACGCGCGGGGCCAGGGATATCATCAAGTGGCACAGCGATGCTGCGGTCCAGTTCCTGACCTCGGATCCACCATTCACTGC<br/> TCCTACCACCGCCACCGCCCTCCCGACCCATTCTGTGTACGAGAACTCCGTTGTAGAATTGCTGGCCATGTGAGACTGGTTCGAG<br/> TGATCTCGGATACCAAGCAGGTGCCCCCTCCGATGCTTCTATATGCTTCCGGCATGGCAGCCATCTACCAGTGCATCAGTCCATTC<br/> TGGCCTGGCGAACC GGAGTCCGTGAATGCCGCTCTGATGGCCGACCTAGTATCTGCAAGCGGAAGGTCAGGGGTTAAG<br/> GTCTACAACCTAGGAACGAGGCGACTTGAATCATCTTGTGCTGCCAGCTGGAGCTGGGATCCGGGGAAGCTCGCGCGGTGCAAGCA<br/> ATCTGGTGTGAATGTCCAGTAACCTCACACTGCAGACGGTCAATTTGCAGCGGATACGTGCGCTGGCGGACCAACATGGCATTCTGT<br/> GTAGTGGACGACAGCATTGCCAGCTTCCGCACTTGGATCTGTTGGGAGTGGCGGACATTATCGTCTCTCGTGTCCAATACTTCAGC<br/> GGATATGCCGACGTAATGGCAGGAAGGCAAGTCAAGTCAAGTCAAGTCAAGTCAAGTCAAGTCAAGTCAAGTCAAGTCAAGTCAAGTCAAGT<br/> TCTCCTCTCGCGCATAACGCGTATTCTGAATCCGAATCTCCACACTACGCGCCCTGCACAAGCAGATATCCGCCACATACGAGAACA<br/> ACCTCTCTCGTGAAGATGCGATCCGACTAGAATCAACAGCCGGAACTTCCCTCTCGATGGATCGAGTCAACAAGACAACGCAACAC<br/> CTGGTACCCAGCTTTTGCCTCTCGTCTCGGATCCCGGAGCCATTGACCCGATTTTCCACCCGTCCTGTGCGCATCCCGTCCGAACT<br/> ATGAGCGTCAGATGCGTCTCCCTCGTCTGAGATGCTCGCCGGGGTATGGAGGCGTCTTACGATGGAGTTCGCCGACATCGCAAGC<br/> GCGTCCGTCTTTTACCCTTACACGTCTGCAAGGGCCTCTCTTTGGCGCGGATGCTGCATCGCGTCCCGTATATGCAGATGACG<br/> GGGCAGGCCGGAAGAAGCAGGCGTGGTCAATGGCAGCAATGATACTATCATCCGTTTCCCGTGGGGTGGAGGAGCCTGATGAG<br/> GTCTGCACCCGATCAACACCGCGTAGACGCTGCGACGCTGGTGTATAGGGCTAAGGCCATGTGGCCCCGTAG</p> | <p>MTVTVPQDLRLGEPYGDANSLLVQIPTWA<br/> DMVDFGQKQAMNHGYPRSVHPDIRLVR<br/> PLAFFDLVQLGPPGLALILMMMLSLFKLSSA<br/> ILAKVRDDKECTDASLLFSGARTALSCKQYIL<br/> HLAQATDRPTLADSIRVYVDFSGFLCRDHH<br/> AAHSSGSTLYAVLYPSAACRDAHAFWQRAGP<br/> GISSRLAQRCLRSSRPRIHPTAPTATAPPD<br/> THSVYEKLRCRIAGHVRHWSSDPRITKQ<br/> VAPSDVFLYASGMAIYHVHQSILAWRTGES<br/> VNAGLYGPTLSILQAEQGGLRSYNLGTEADL<br/> NHLAAQLELGSGEARAVQAIWCECPSNLTLQ<br/> TVNLQRIRRLADQHGIPVVVDDSIASFANL DL<br/> LGVADIIVSSLSKYFSGYADISATYENNL FVED<br/> AIRLESNSRNFLPRMDRVNKTQHHLVTLPL<br/> VSDPASPLTRIFHPSCASRNPNYERQMRAPSS<br/> EMPRPGYGVFTMEFADIASASVFFDHLHV<br/> CKGLSFGADVCIASPYM<br/> QMTGQAGKKQALVNGTNDTIIRFAVGLEEP<br/> DEVLHRIENTALDAATLVYRAKGHVAP</p> |
| ungD'' | <p>ATGGCCATGCTGGTTCGAGGACAATGACAAGTACCCCGGAGTGCATGACTACGCGCTGAATGAGTTGATCCGCGAGGACTTCTGTTCT<br/> GGACAACCATTGGACGACGGCAAACGTACCATTTAGGATATCTGTCCATCGGACCGGAATGCCGGCCATAACTTCTCGCTGGAG<br/> CTGTGTATGCTGACAAGCAGGCCACTGTTCAAGATGTGGTGTAGGAGCTTGTGCTTCTCCCGTCTACCGCACCCACGACGACTACC<br/> AGTACAATAACGCCATGTATATCGTGGCGTGCATCTTATCCAACAGTGCATGGCGATGACCTCGGCTCTATCTTTCAAAGCACATCTGG<br/> GACCCTCTCGGGATGAGCAGCAGTATTTCCGCTGGATGATGACTTGGCAGTCAAAGCCCTTGGCAAAGGGCTATGCTTCCGCGA<br/> GGCAAGTATGAAGCGGTGGAGTGAAGAAGCAGGCCGAAATCTCCGGCGCGGTGCCATTATCAGCACTGTGGAAGACTACGCGAA<br/> ATGGATCTACGCACTACTGAATCAGAGCGGGTGCCTCTTCTCGGAGGGCTACGGAACACTCTGGACCAGGAGACTCATTCCAA<br/> ATTCCGAGCCGTTTTTGGCCCCGATGGCGTATGCCCTTGGATGGGACCGTTACATCTACAGGGAGTGGAGATCATCACTCAGATGGGG<br/> GGATAGAGGGATTCCGAGCCGAGATTGTGATGATCCCGCGCTAAATTTGGGGTTCATACCATTGGCTAACTCGACTTATCTCCA<br/> ATGGGGGAACATGCCTGGCGTATGAGCTTATCGATTGCAAGCTGGGCATCGTGTGGGGGACAGATTGACTGGAAACAAAAGTGTGT</p>                                                                                                                                                                                                                                                                                                                                                                                                                                                                                                                                                                                                                                                                                                                                                                                                                                                                                                                                                                                                                                      | <p>MAMLVEDNDKYPGVQWTTVPNELIREDFVL<br/> DNHWTTANVTIEDILSHRTGMPGHNFSLGA<br/> VYADKQATVQDVVRSRFLRFPSTAPPRTTYQY<br/> NNAMYIVASHLIQTVMGDDLGSIFQKHIWD<br/> PLGMSSTYFRLDDALASQKPLAKGYAFAEGK<br/> YEAWEWKNRPEISGAGAIISTVEDYAKWIYAL<br/> LNQSGPLSSEGYTLWTARALIPNSEPFLAP<br/> MAYALGWDRYIYQVVEIITHDGGIEGFGEIV<br/> MIPALKFGVITMANSTYSSNYGGTCLAYELID<br/> SKLGIAGDRFDWKQKYVDIVDQMDAYNA</p>                                                                                                                                                                                                                                                                                                                       |

|                                                                                                                                                                                                                                                                                                                                                                                                                                                                                                                                                                   |                                                                                                                                                                    |
|-------------------------------------------------------------------------------------------------------------------------------------------------------------------------------------------------------------------------------------------------------------------------------------------------------------------------------------------------------------------------------------------------------------------------------------------------------------------------------------------------------------------------------------------------------------------|--------------------------------------------------------------------------------------------------------------------------------------------------------------------|
| CTTGTCATTCTTGCTCTCAACAACTGACTAAATCGGGAGCAGATATGTCGATATCGTCGACCAATGGACGCTTACAATGCAGACG<br>CGGTCAAATCTTCTACCCCGATCTCCGTCTCCTCCTTACCGGGGCCGACTCTCGCTATCGAAGCATACTCCGGCACCTACTGGCATGAT<br>GCCTACGGTCGGCTCGATCTCCATAGATGGCACCGGCACAAAGCTCCACGCGGACCGAACTAATTGTACCAATACCTGCTCTTACAT<br>TCGAGAACGTCACGGGAACTACTTTATTATTAGGCTGCTTGTAGTTGGAGCCGAGACCGTCCTTCCAGCTGAGTTTTCGGTTGACCCGG<br>ACGGGAAGCCAAGGTCTGTCGGTATAGGGTGGGAGCCAACGATGGGGATAGAGAAGAAGATTTGGATGCGCAAGGTCGATGGTGATG<br>ATACCGTTGGGCTGCATCGCGCCCTGCCGTACAAGCCATCCAGAACTCCCCAGCTGCCGGAGTTTTGACTGGCCACCTTTTTGTCTAG | DAVQIFYPDLSPPLPGPTLAI EAYSGTYWHD<br>AYGRDLSDIGTGTLHADRTNCTNCSLTFE<br>NVTGNYFIIRLLVGAETVLP AEFVDPDGKP<br>RSVGIGWEPTMGIEKKIWMRKVDGDDTVG<br>LHRALPYKPSRTPQLPEFLTGHFLV |
|-------------------------------------------------------------------------------------------------------------------------------------------------------------------------------------------------------------------------------------------------------------------------------------------------------------------------------------------------------------------------------------------------------------------------------------------------------------------------------------------------------------------------------------------------------------------|--------------------------------------------------------------------------------------------------------------------------------------------------------------------|

Figure S1: A domain sequence alignment comparing UngA, UngA', and UngA". The table displays pairwise sequence identity percentages for various regions (A1-A7) across the three protein variants. The diagonal represents self-alignments, while the off-diagonal cells show the percentage of identity between different regions of different variants.

Figure S1: A domain sequence alignment comparing UngA, UngA', and UngA".

Figure S2: C domain sequence alignment comparing UngA, UngA', and UngA". The table displays pairwise sequence identity percentages for various regions (C1-C7) across the three protein variants. The diagonal represents self-alignments, while the off-diagonal cells show the percentage of identity between different regions of different variants.

Figure S2: C domain sequence alignment comparing UngA, UngA', and UngA".

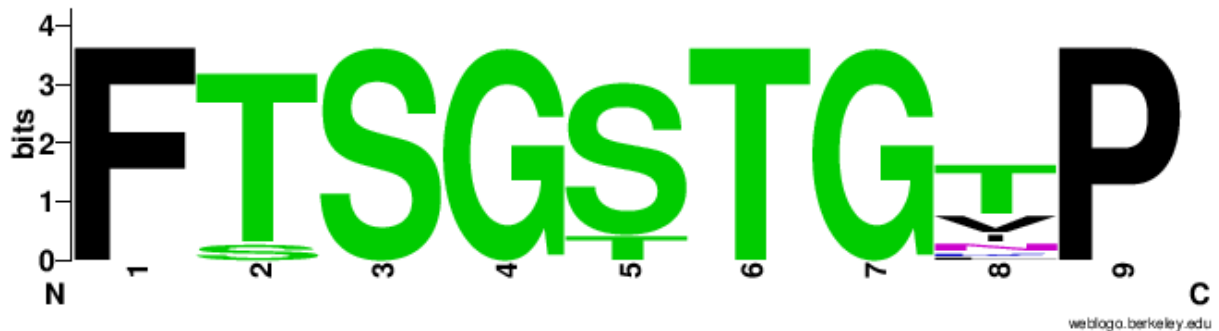

Figure S3: A domain AMP binding motif identified in extracted A domains.

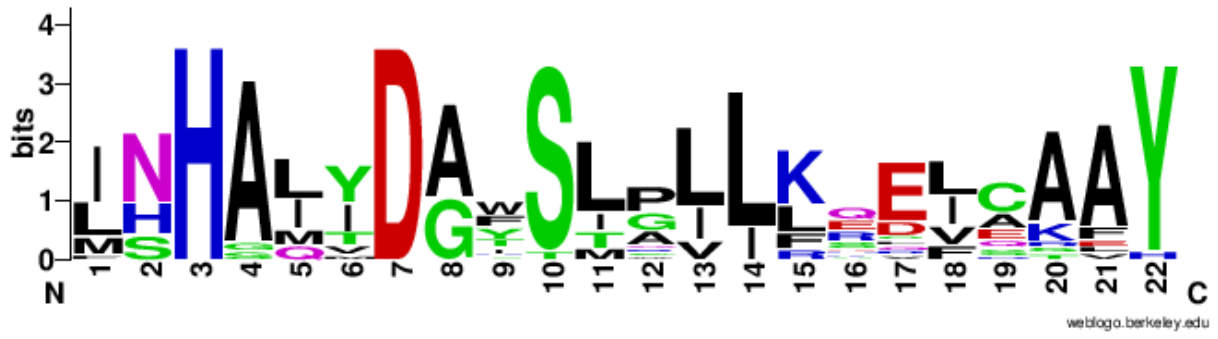

**Figure S4:** C domain active site identified in extracted C domains.

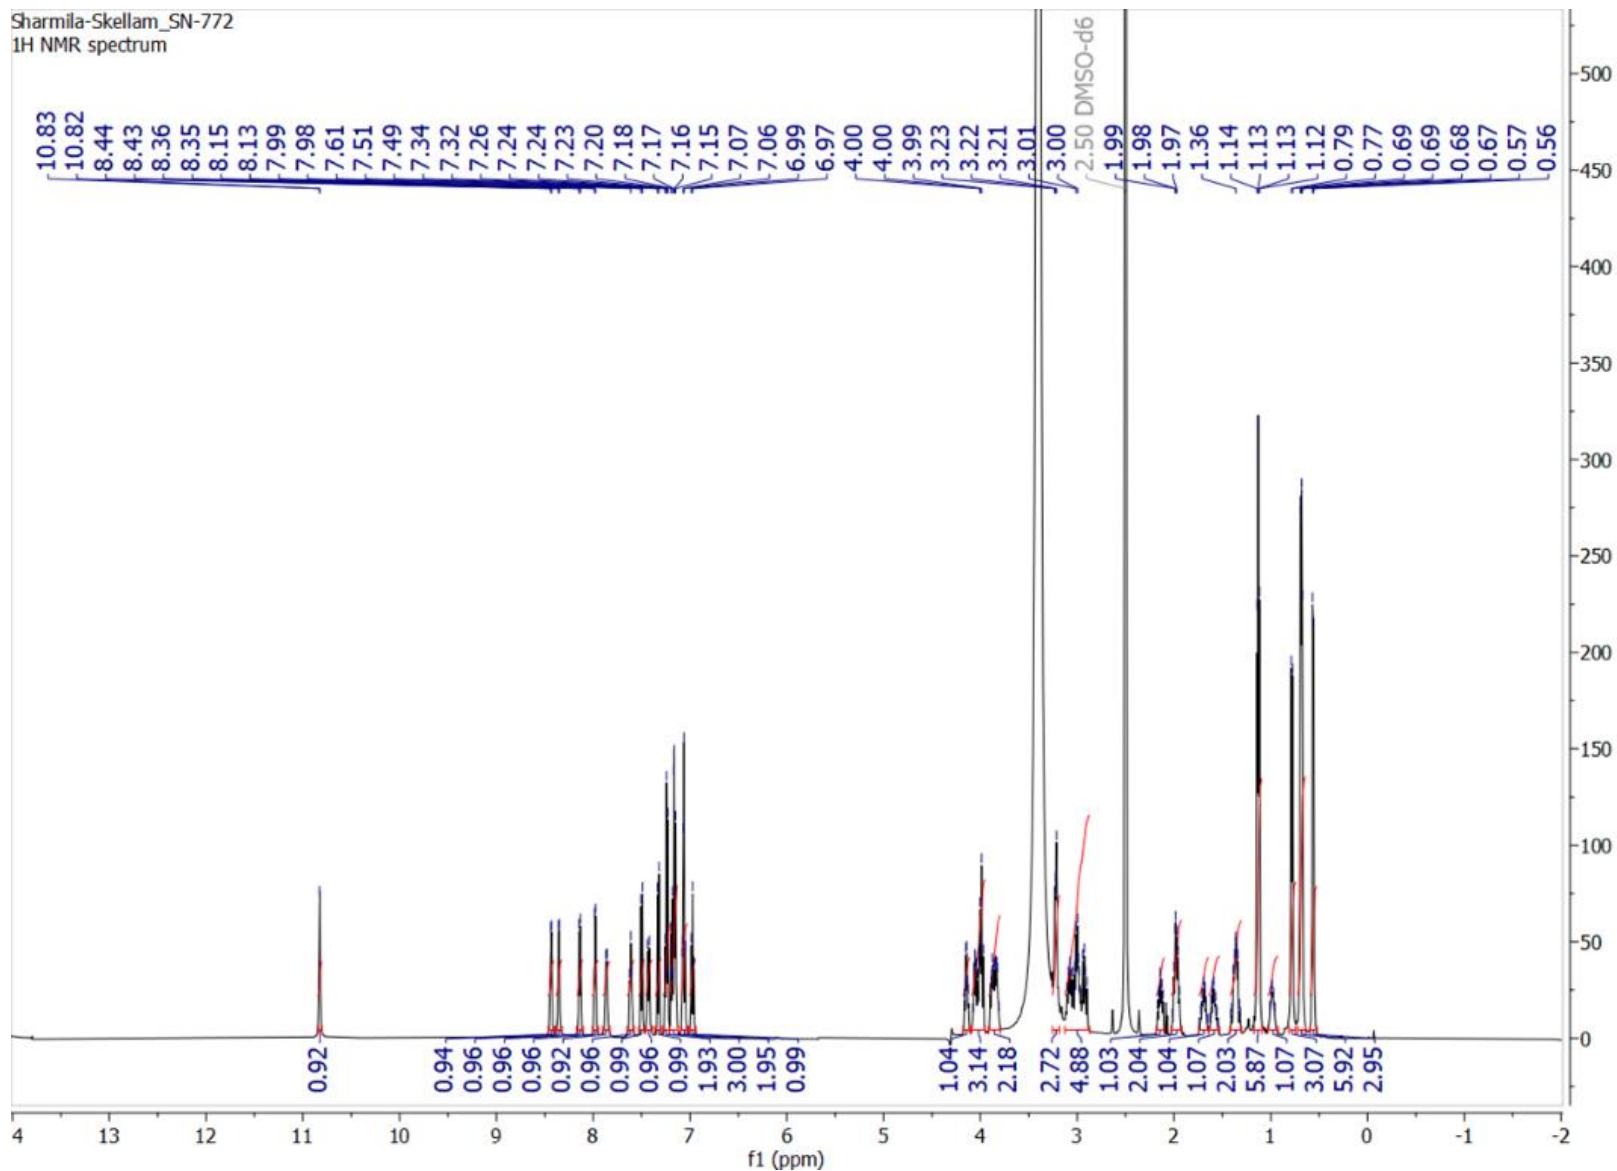

**Figure S5:** <sup>1</sup>H NMR spectrum of **1** (500 MHz, DMSO-*d*<sub>6</sub>).



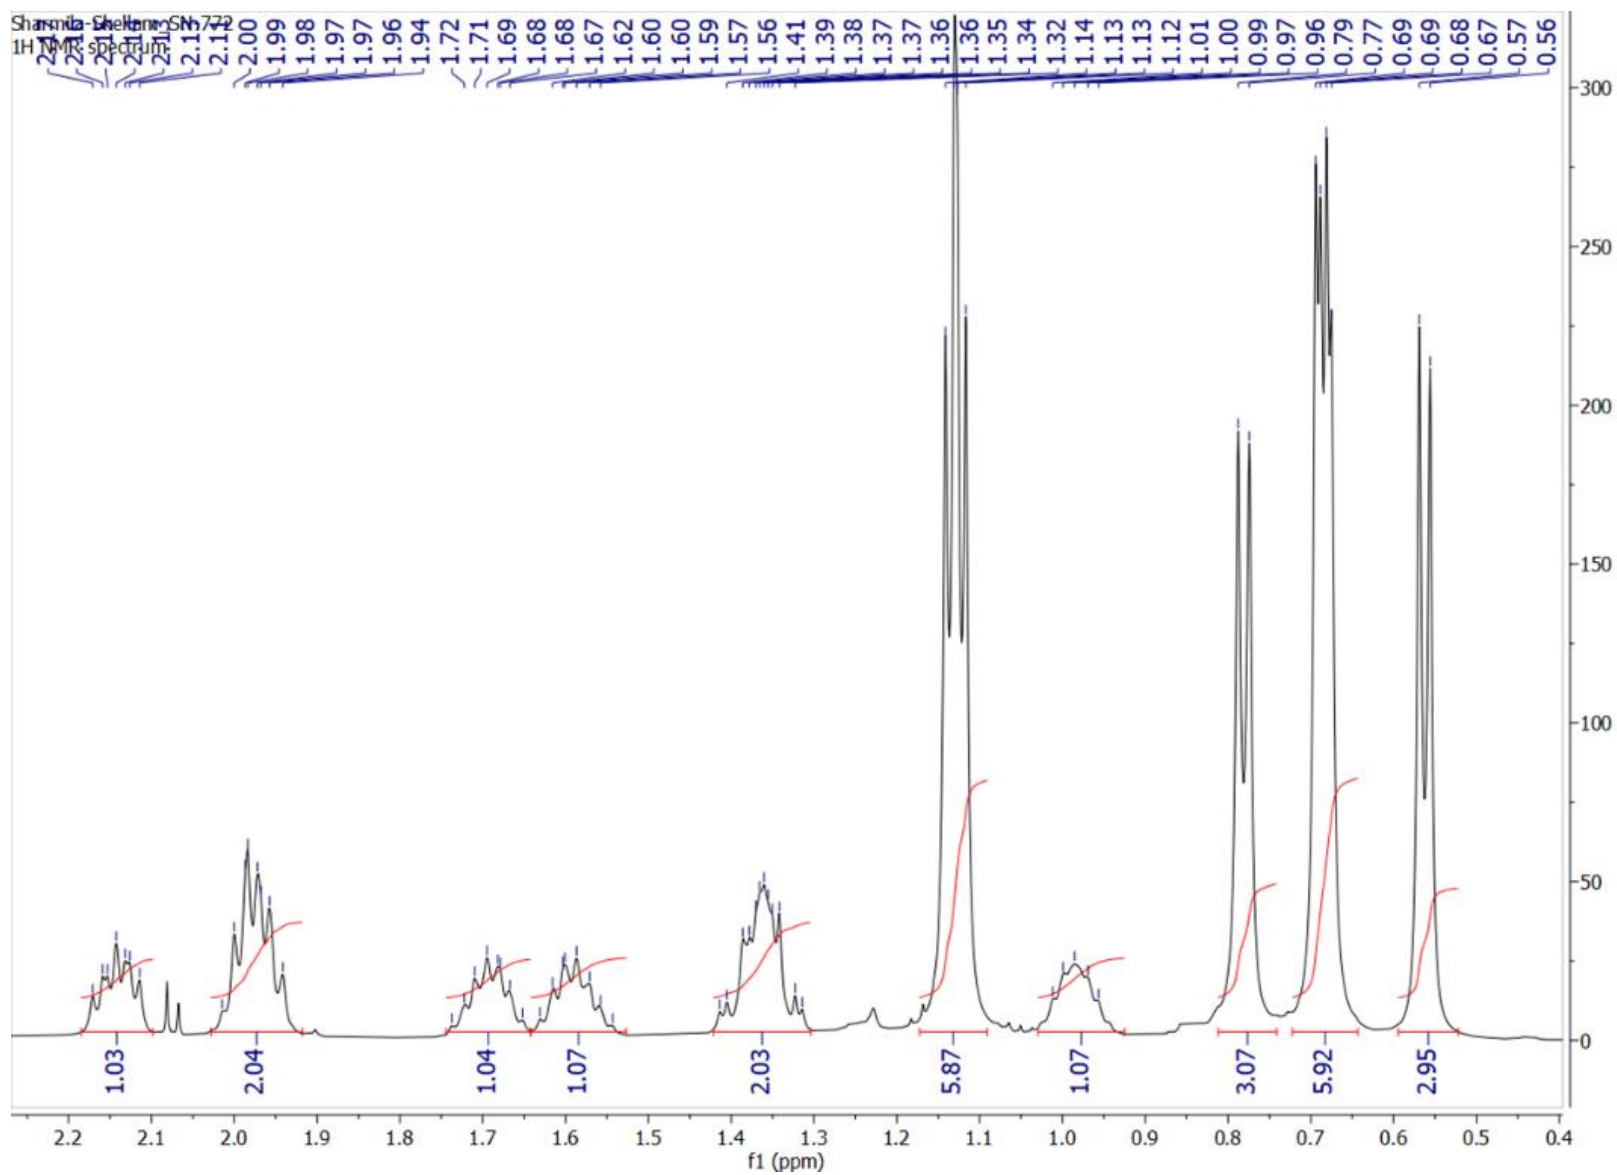

**Figure S6:** Expansion of the  $^1\text{H}$  NMR spectrum of **1** (500 MHz,  $\text{DMSO-}d_6$ ).

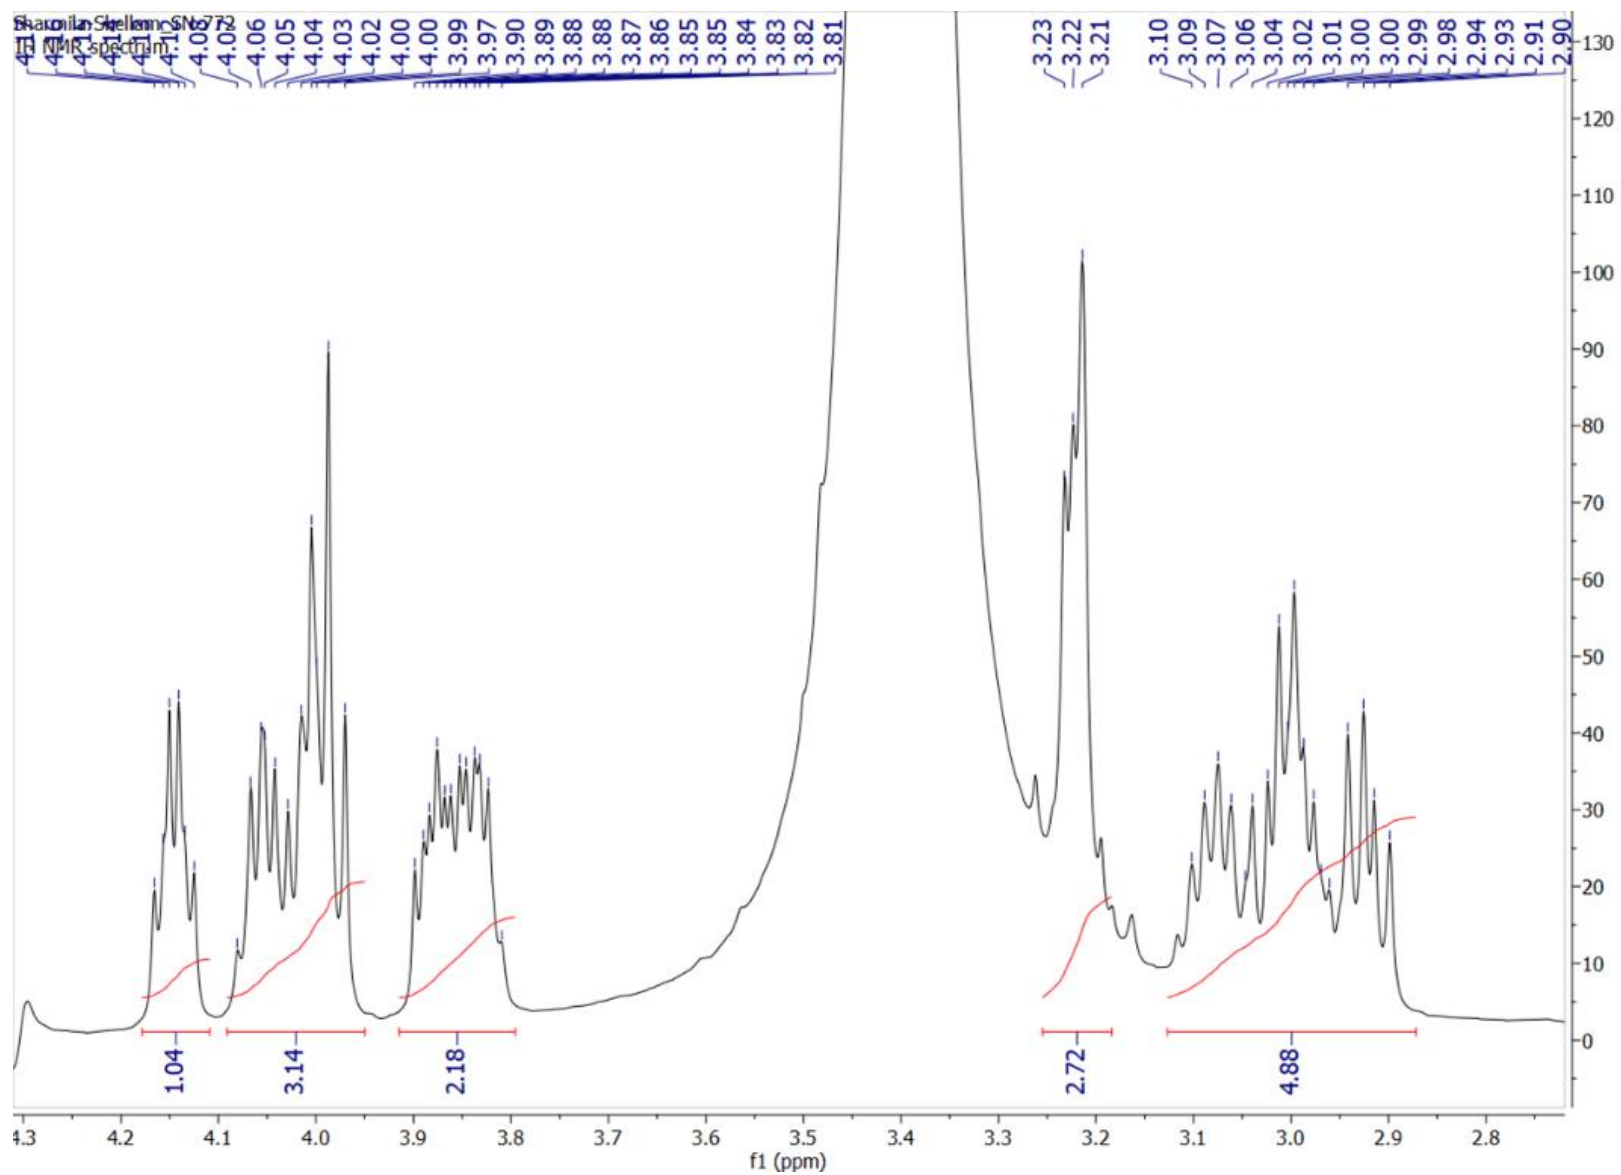

**Figure S7:** Expansion of the  $^1\text{H}$  NMR spectrum of **1** (500 MHz,  $\text{DMSO-}d_6$ ).

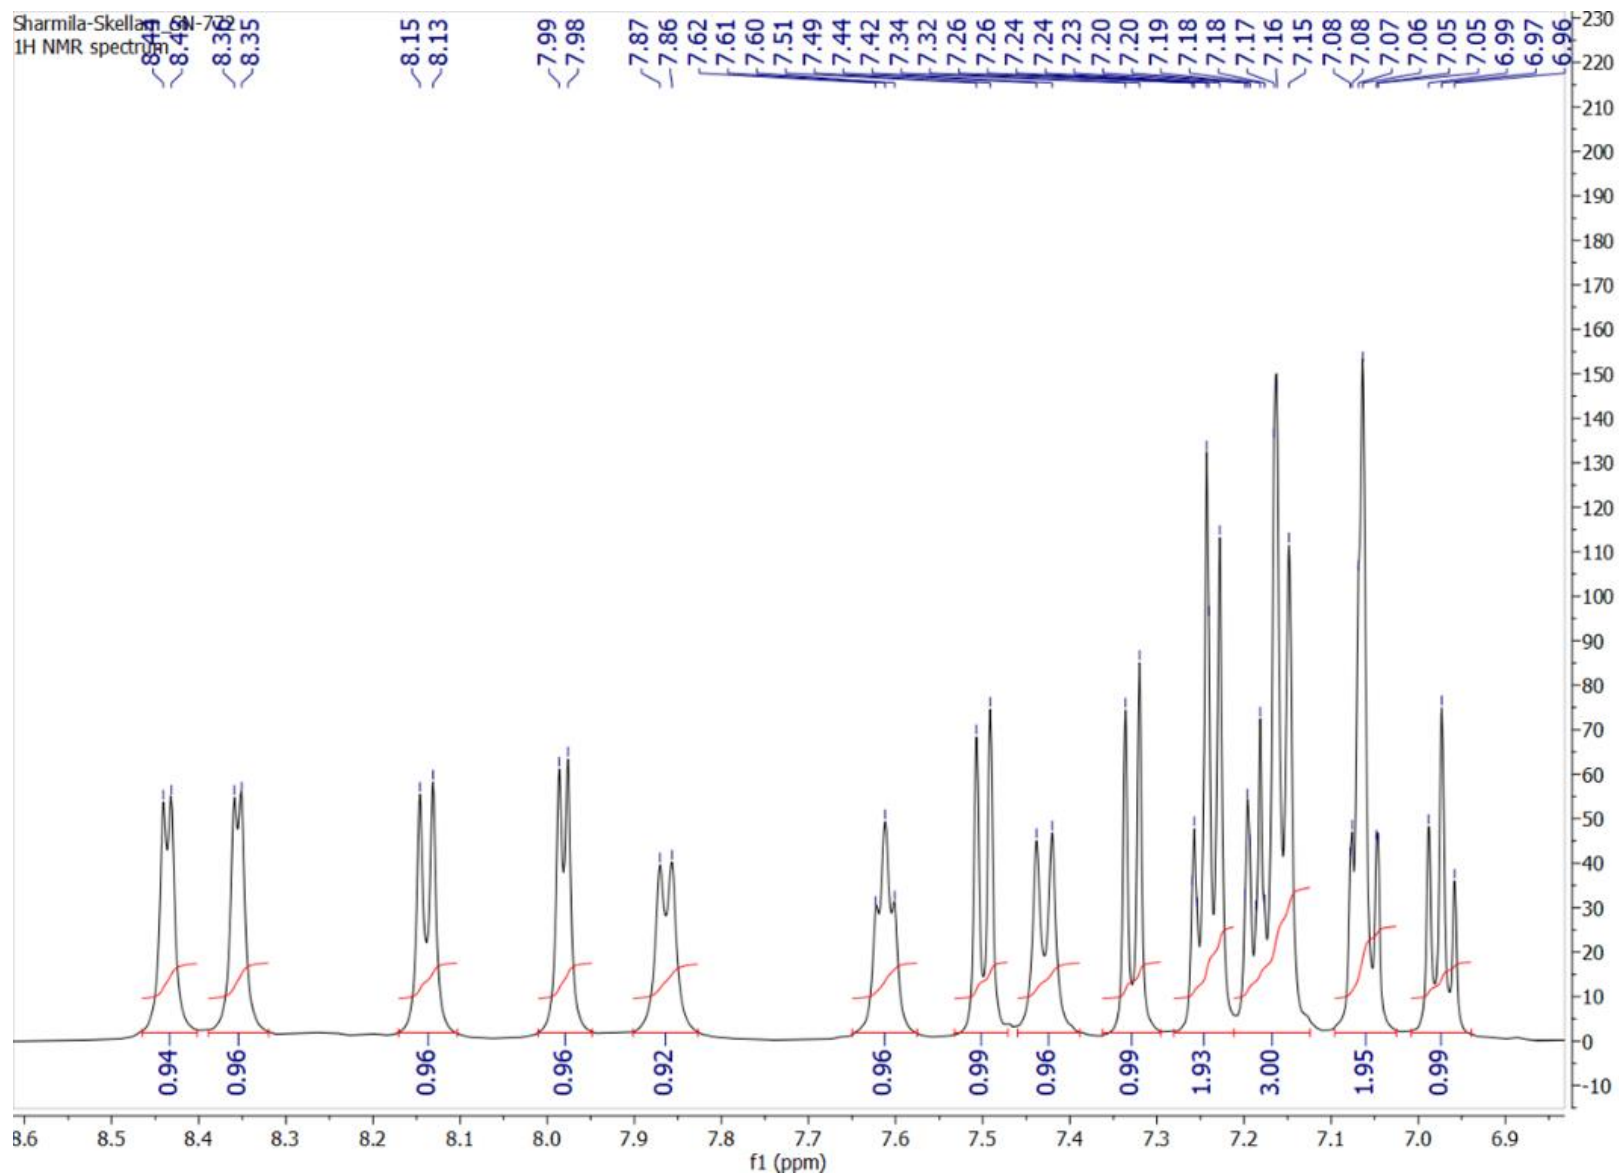

**Figure S8:** Expansion of the <sup>1</sup>H NMR spectrum of **1** (500 MHz, DMSO-*d*<sub>6</sub>).

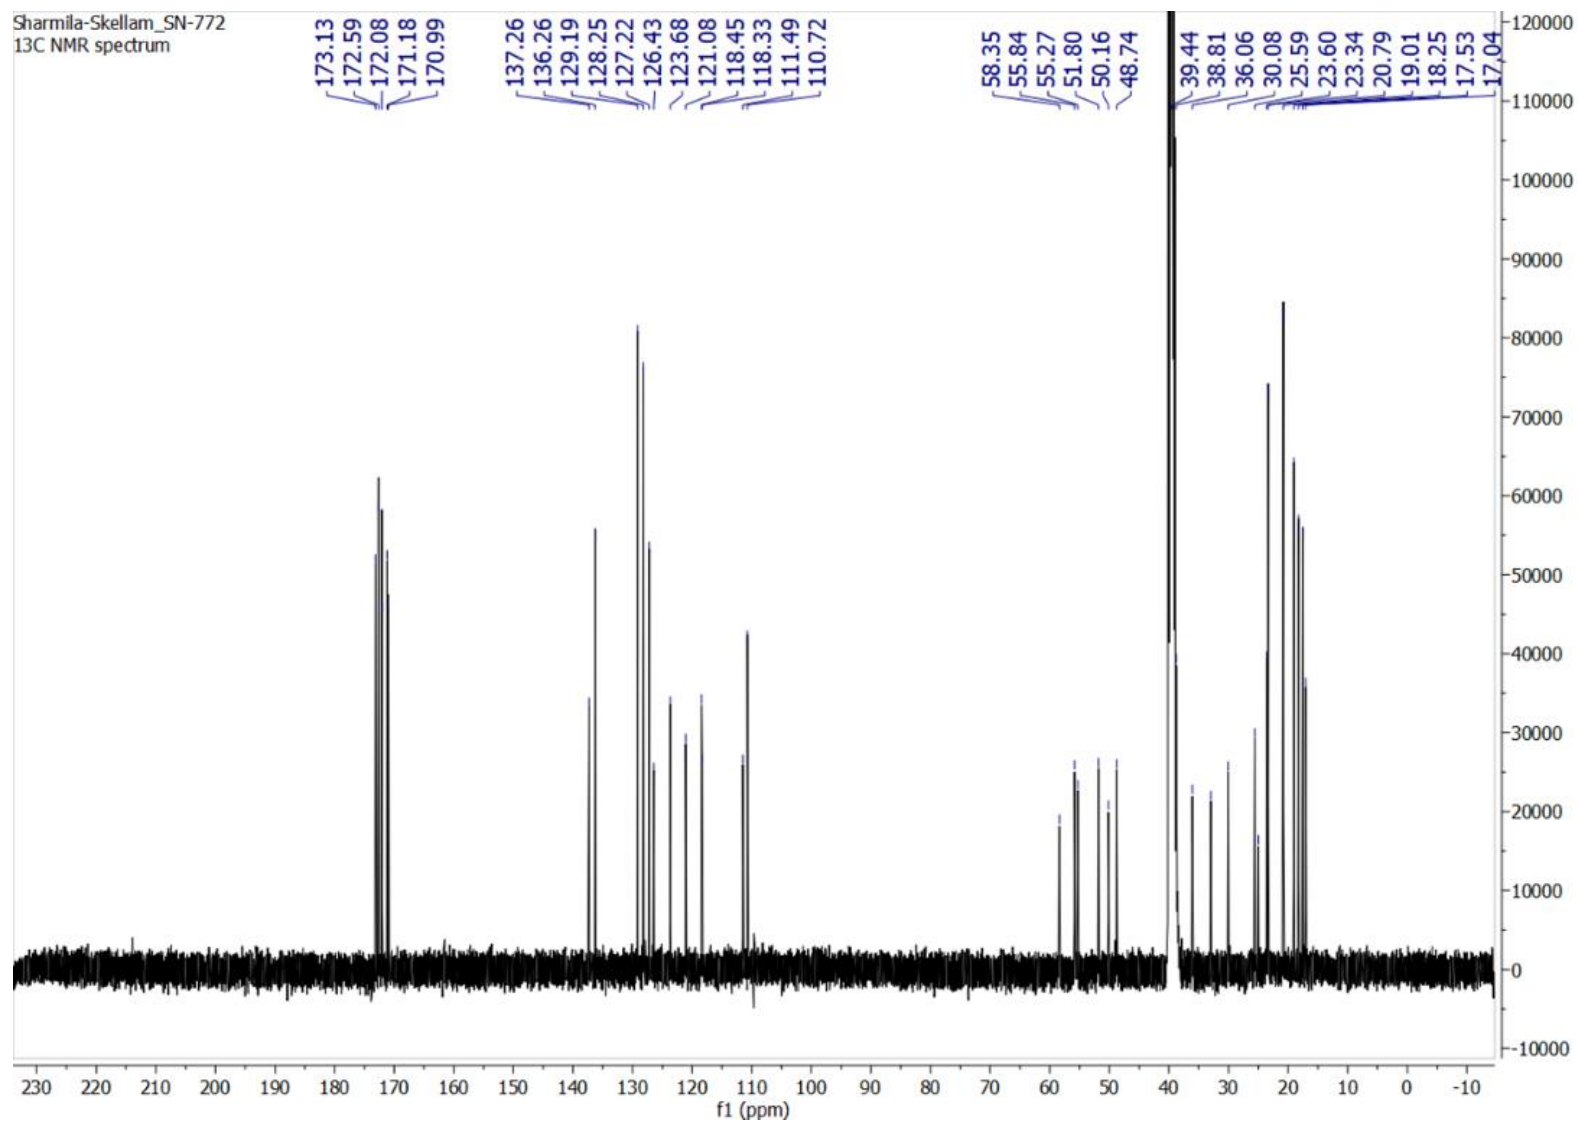

**Figure S9:**  $^{13}\text{C}$  NMR spectrum of **1** (125 MHz,  $\text{DMSO-}d_6$ ).

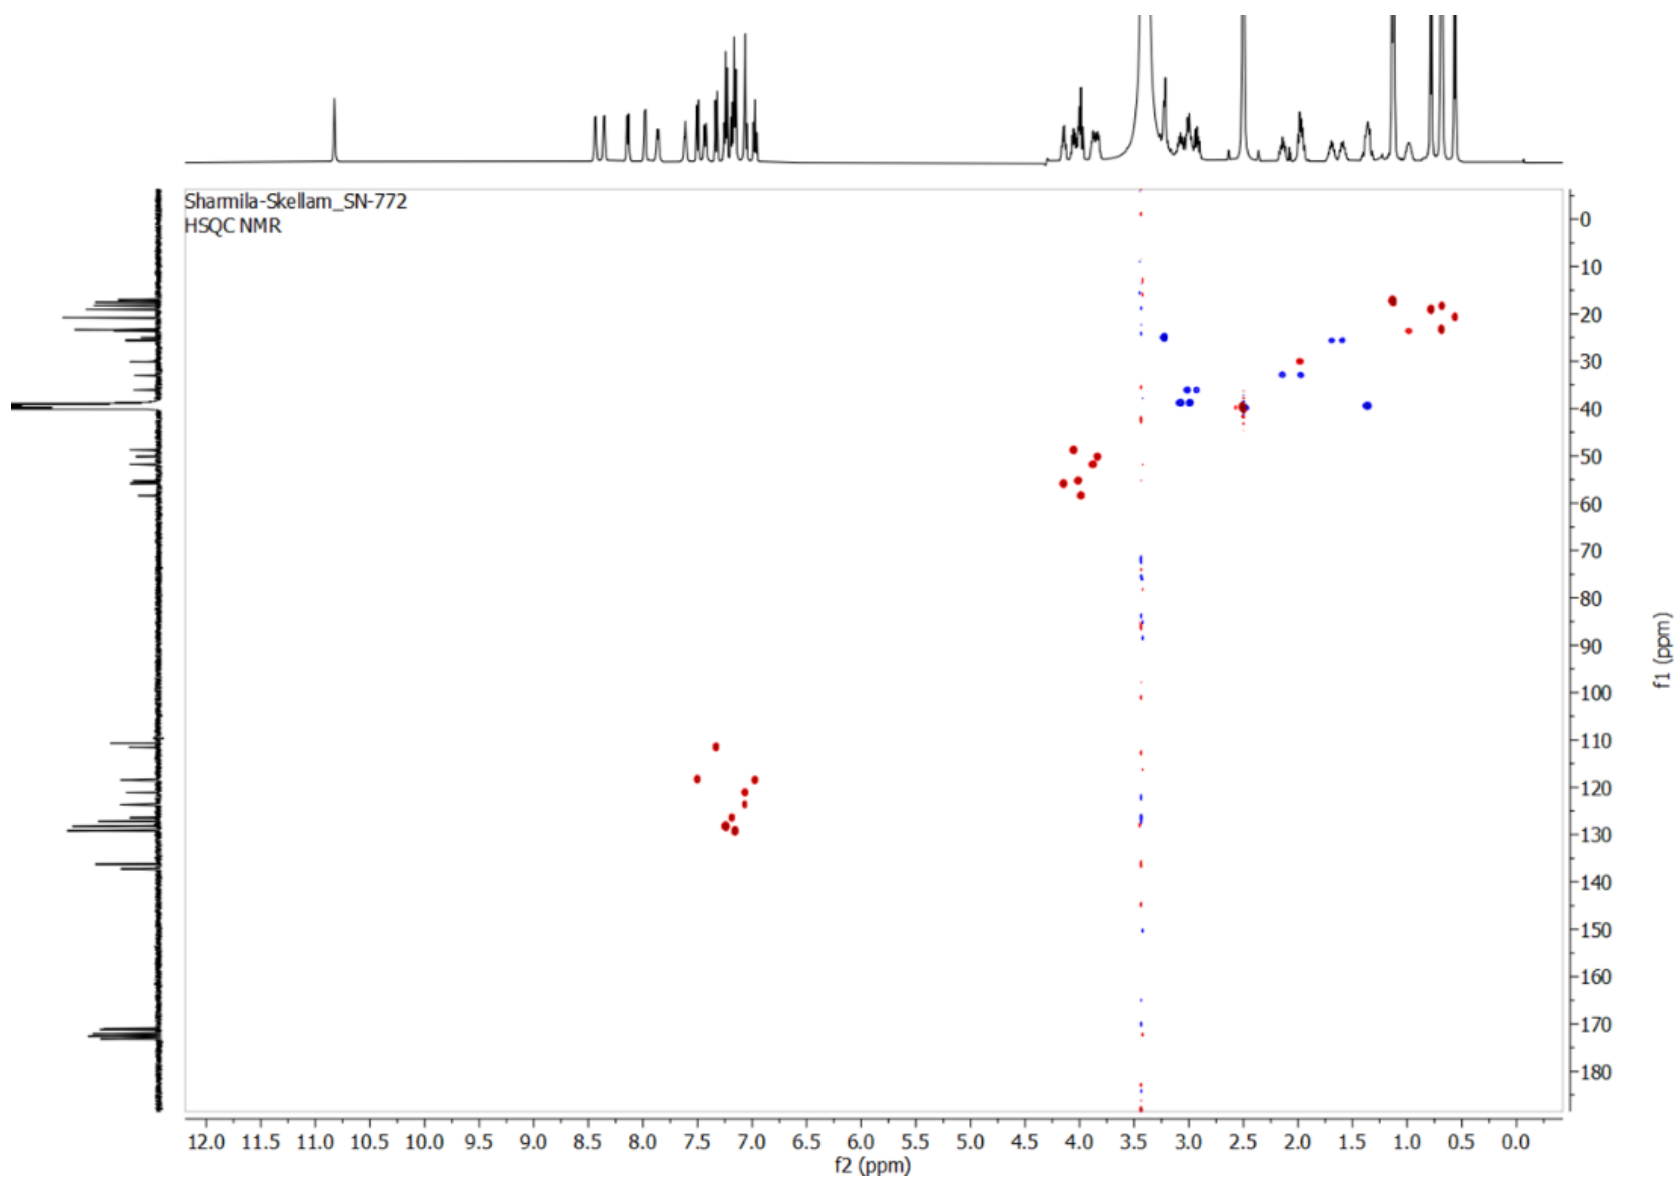

**Figure S10:** gHSQC spectrum of **1** ( $^1\text{H}$ :500 MHz;  $^{13}\text{C}$ :125 MHz,  $\text{DMSO-}d_6$ ).

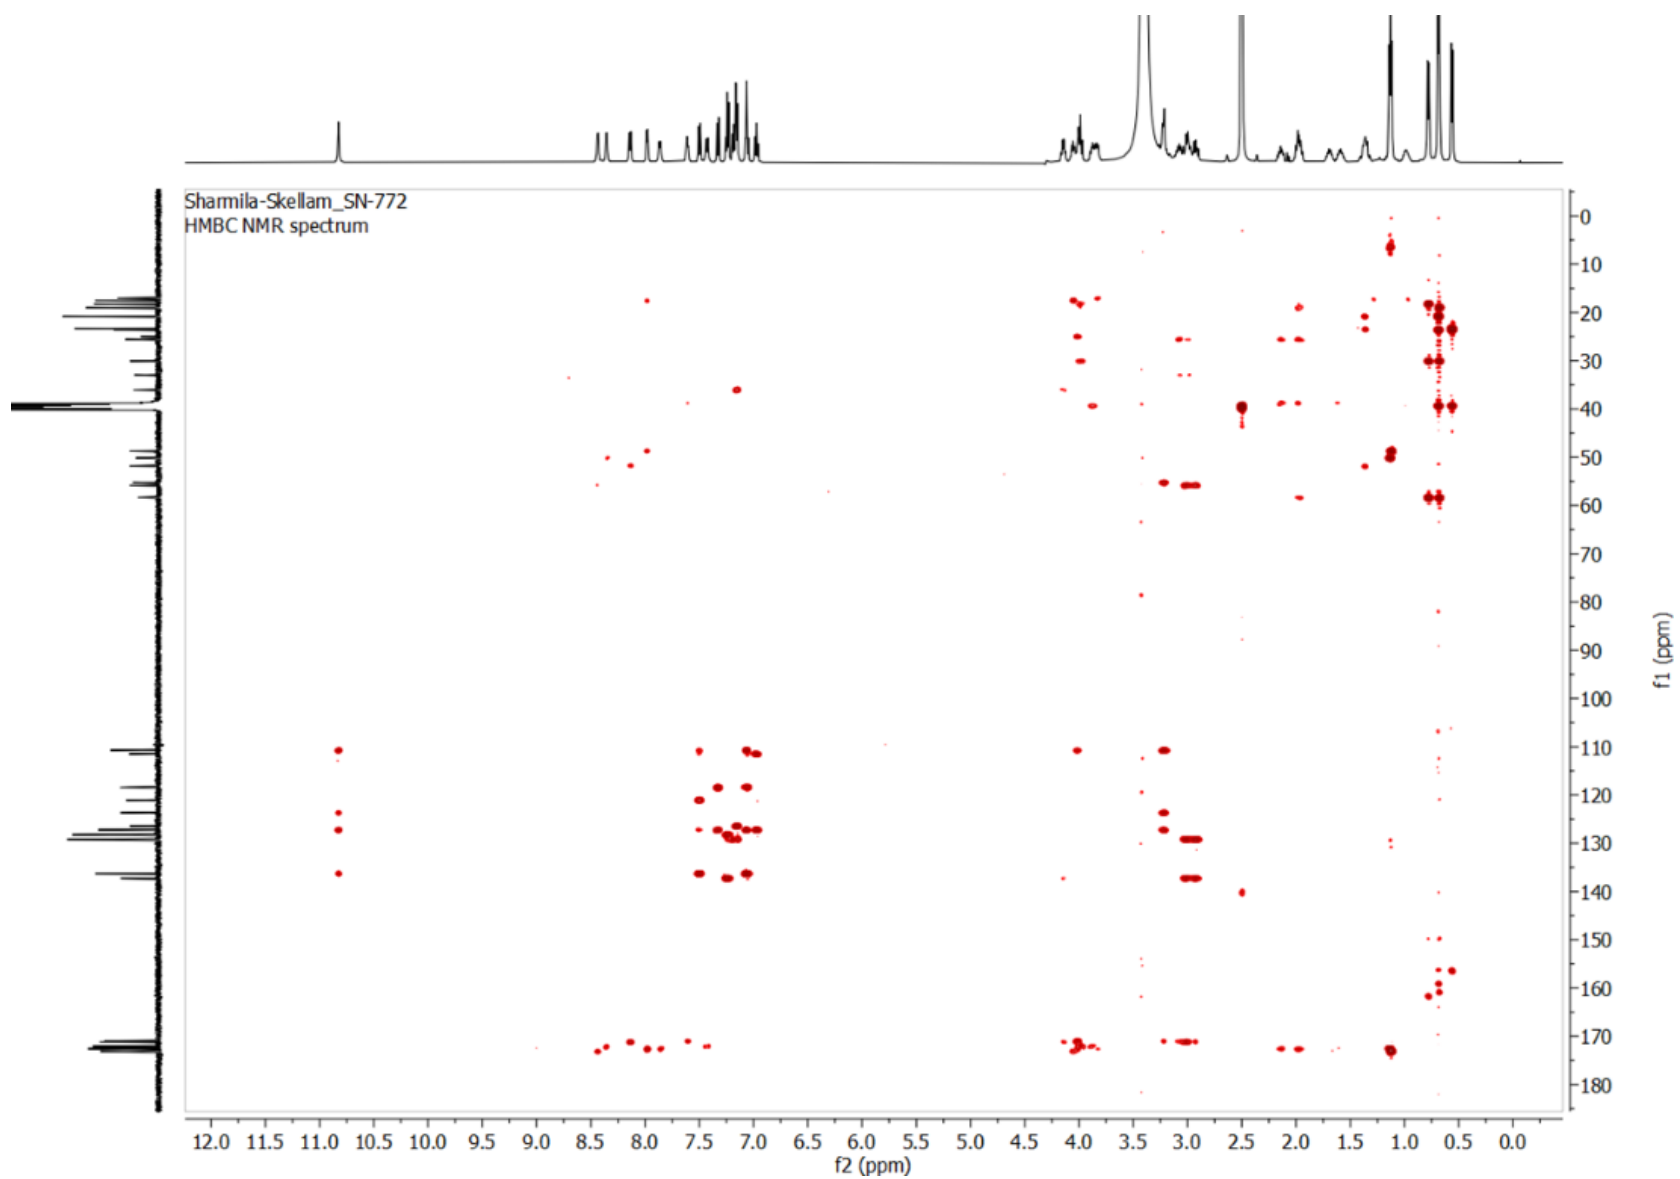

**Figure S11:** gHMBC spectrum of **1** ( $^1\text{H}$ :500 MHz;  $^{13}\text{C}$ :125 MHz,  $\text{DMSO}-d_6$ ).

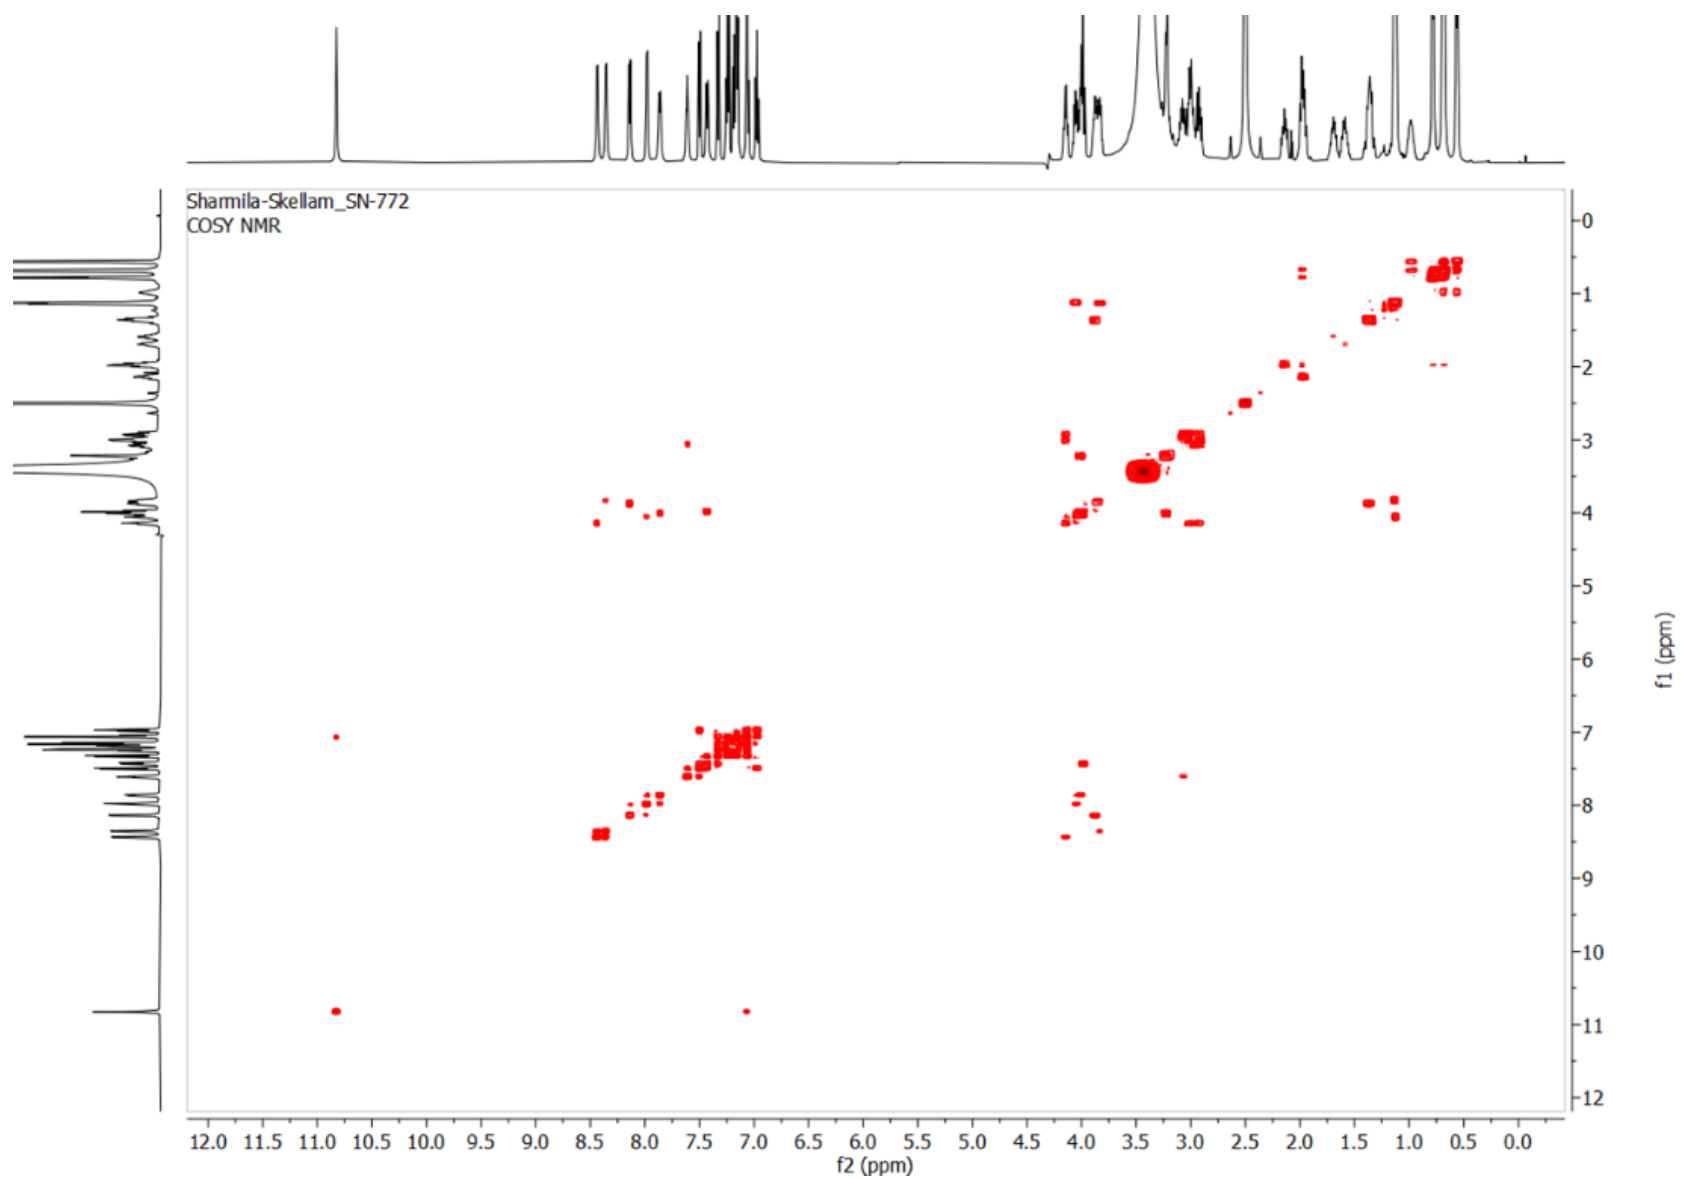

**Figure S12:** gCOSY spectrum of **1** (500 MHz, DMSO- $d_6$ ).

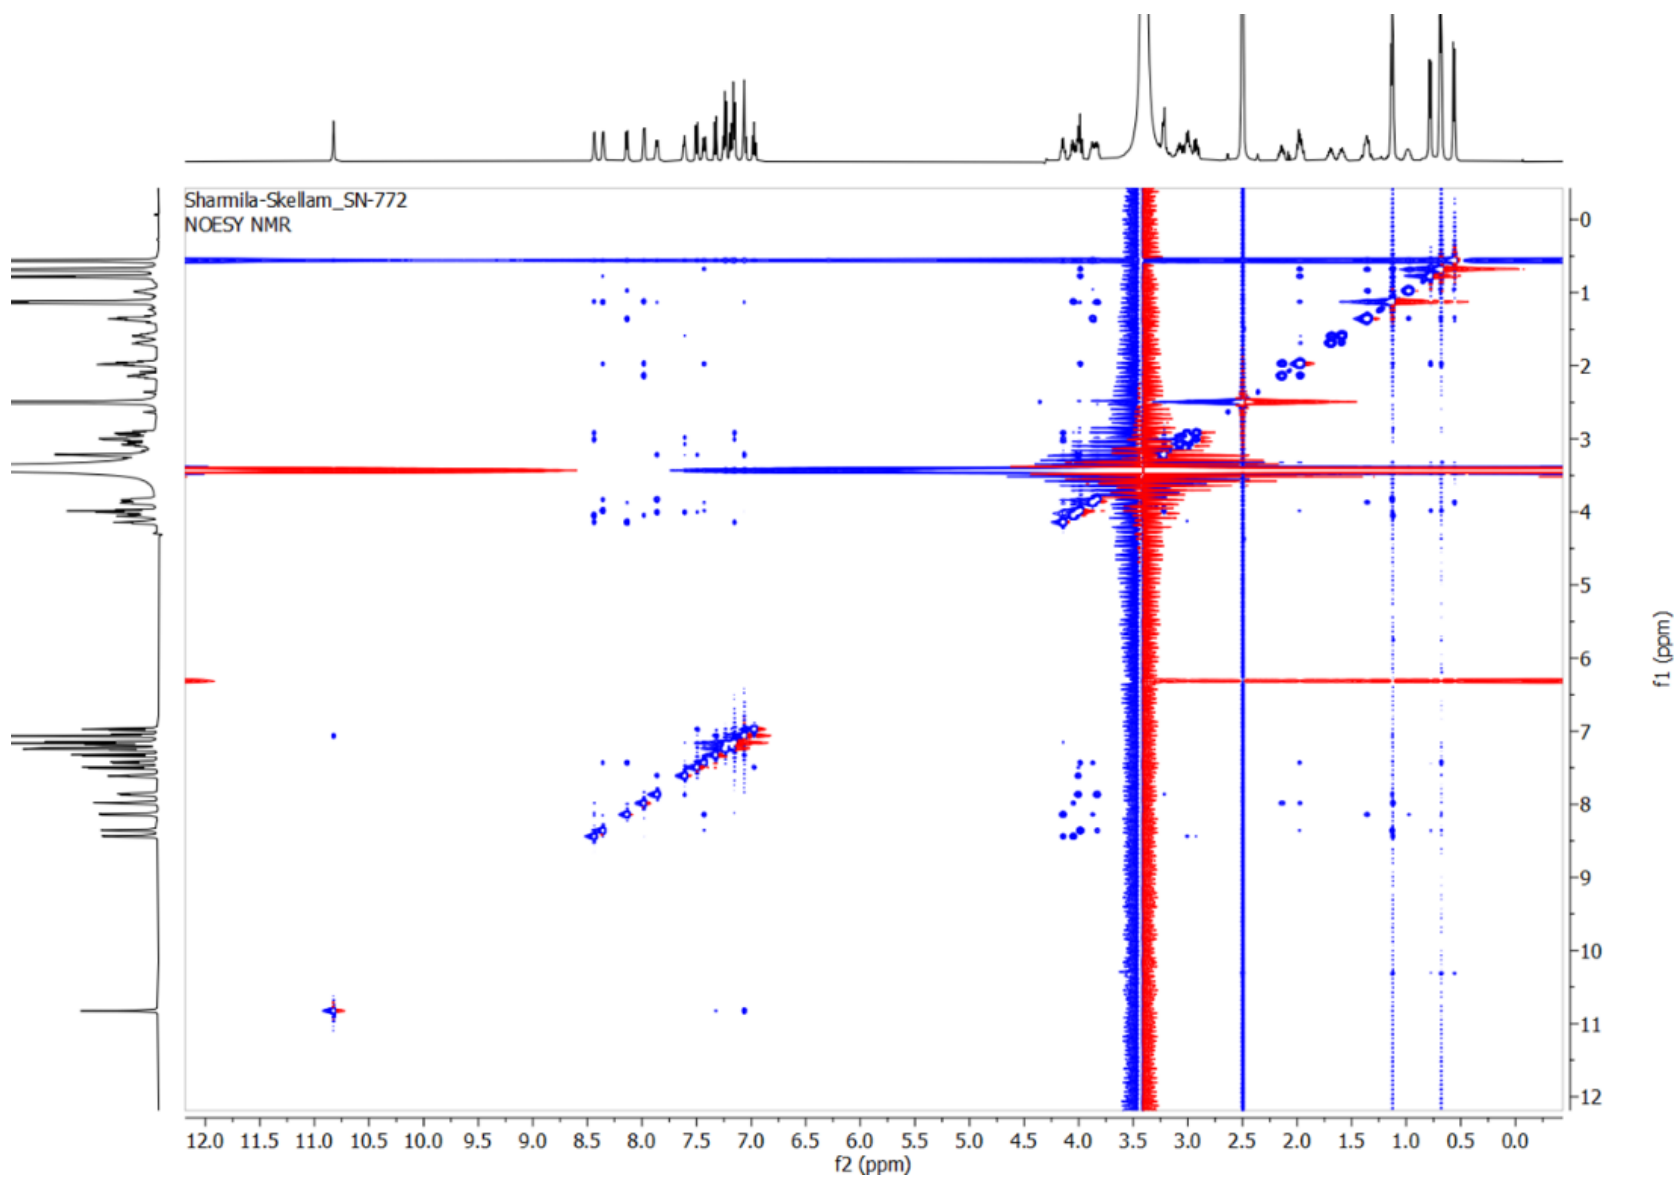

**Figure S13:** 2D-NOESY spectrum of **1** (500 MHz, DMSO-*d*<sub>6</sub>).



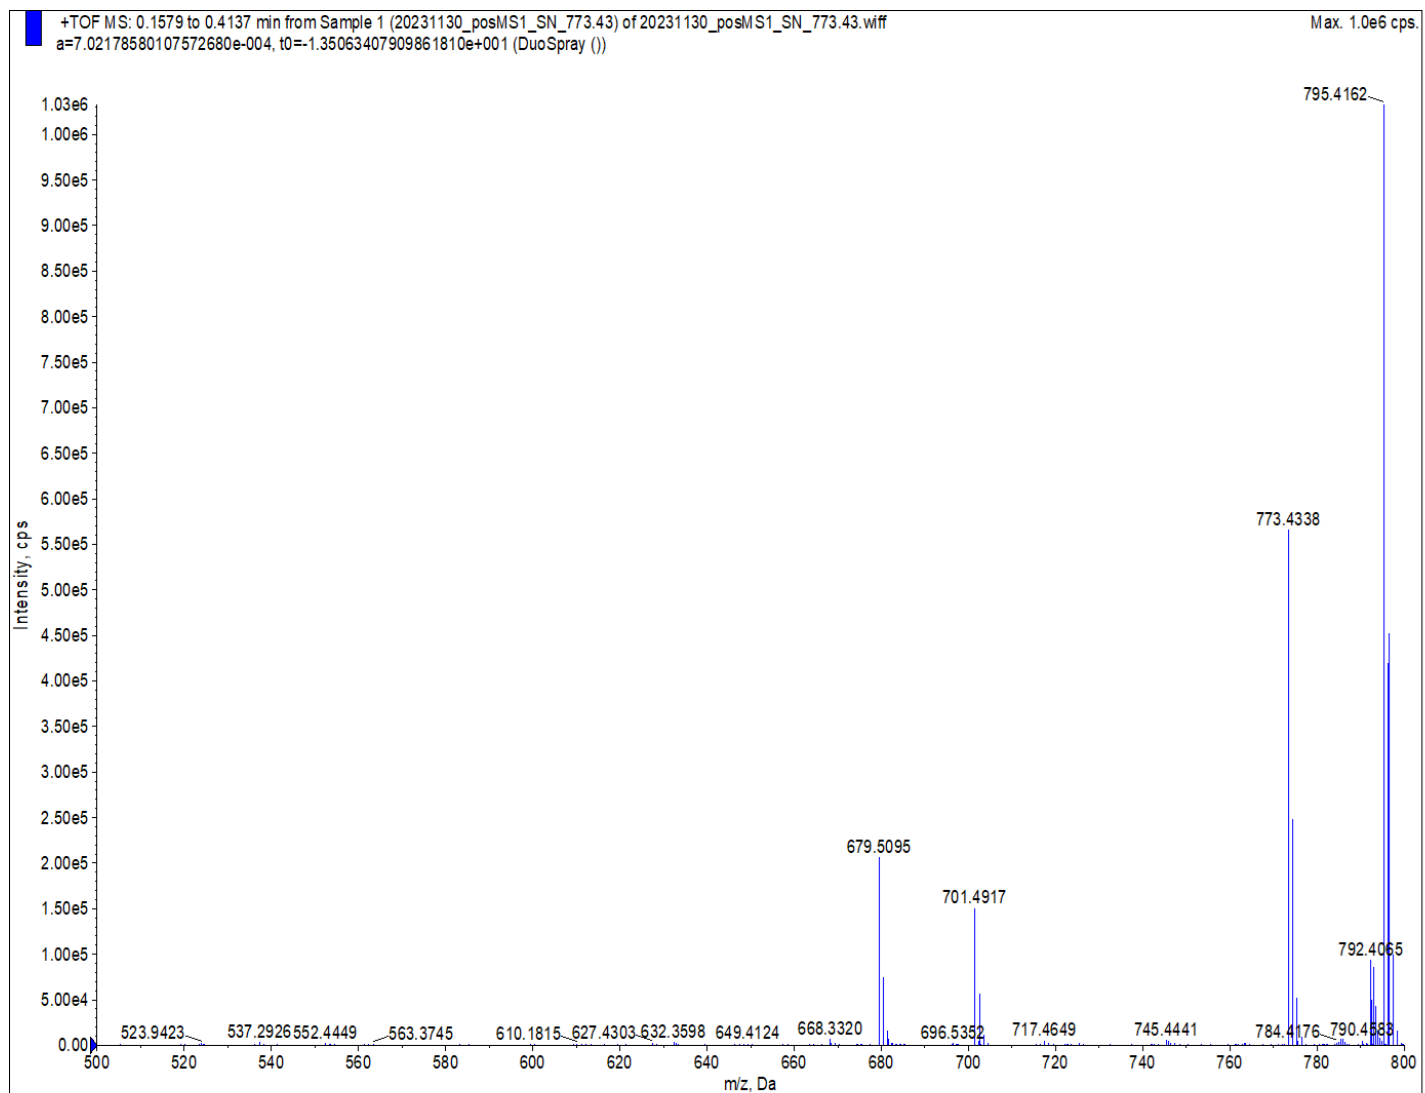

Figure S14: HRESIMS spectrum of **1** in positive ionization mode.

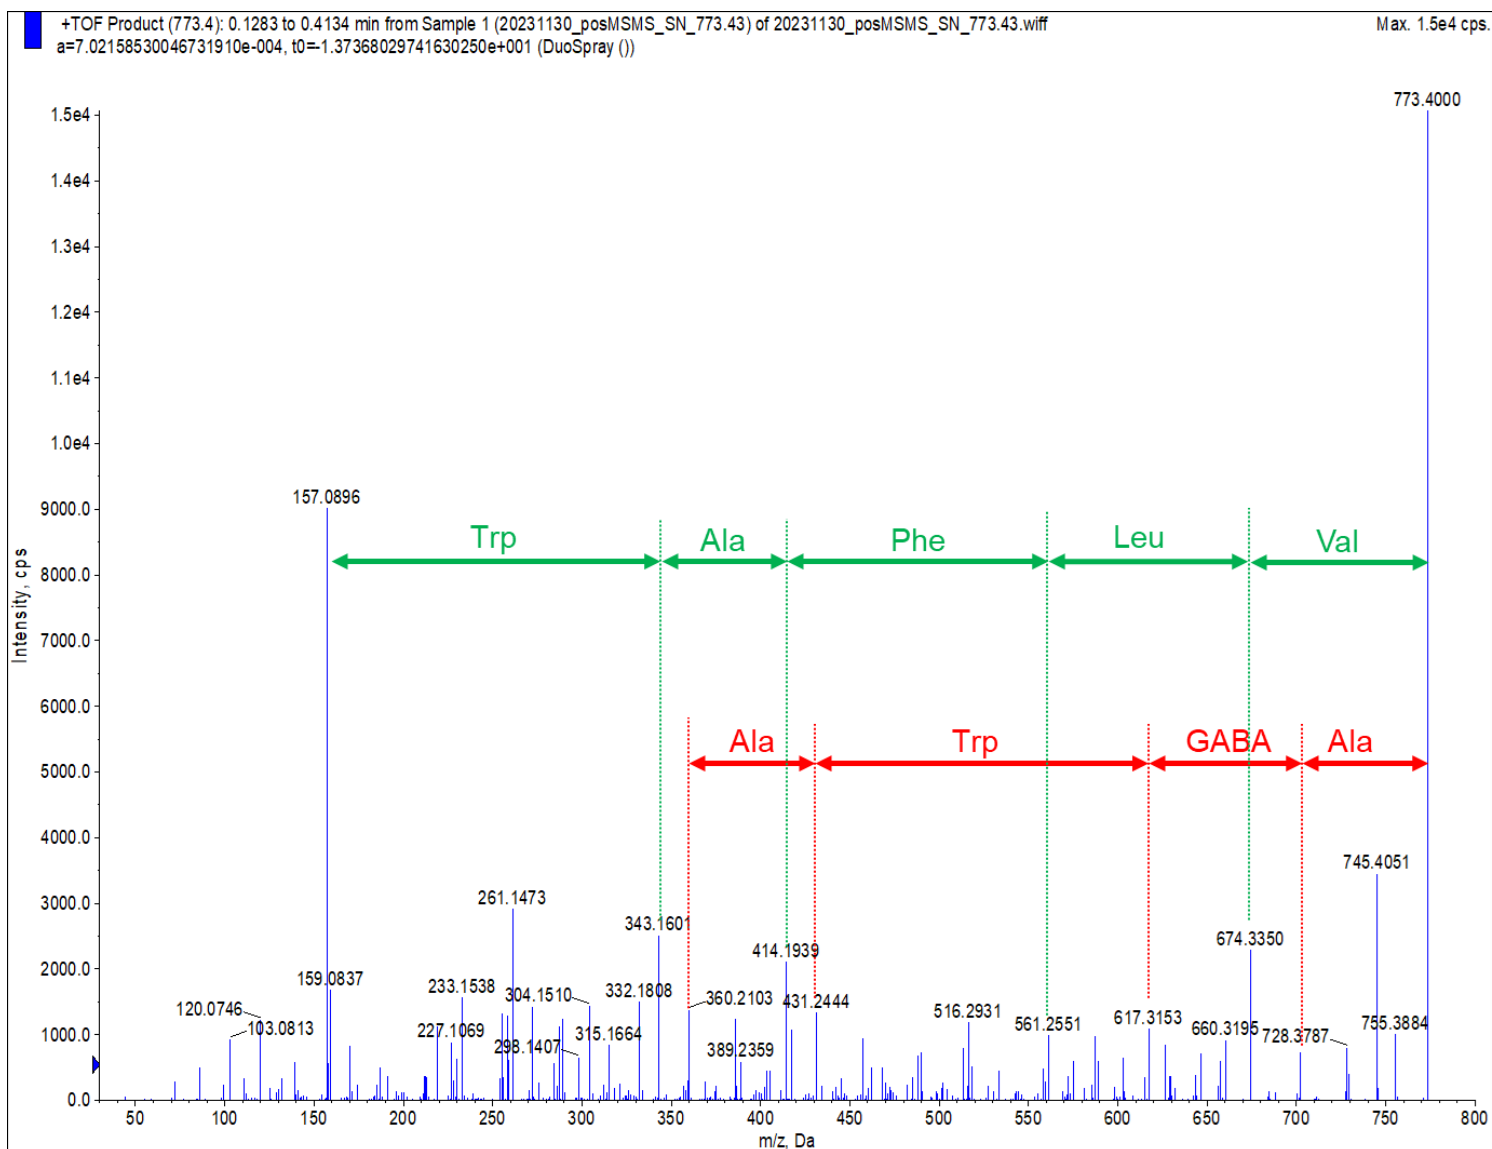

**Figure S15:** HRESIMS/MS spectra of **1** and fragmentation patterns in positive ionization mode.

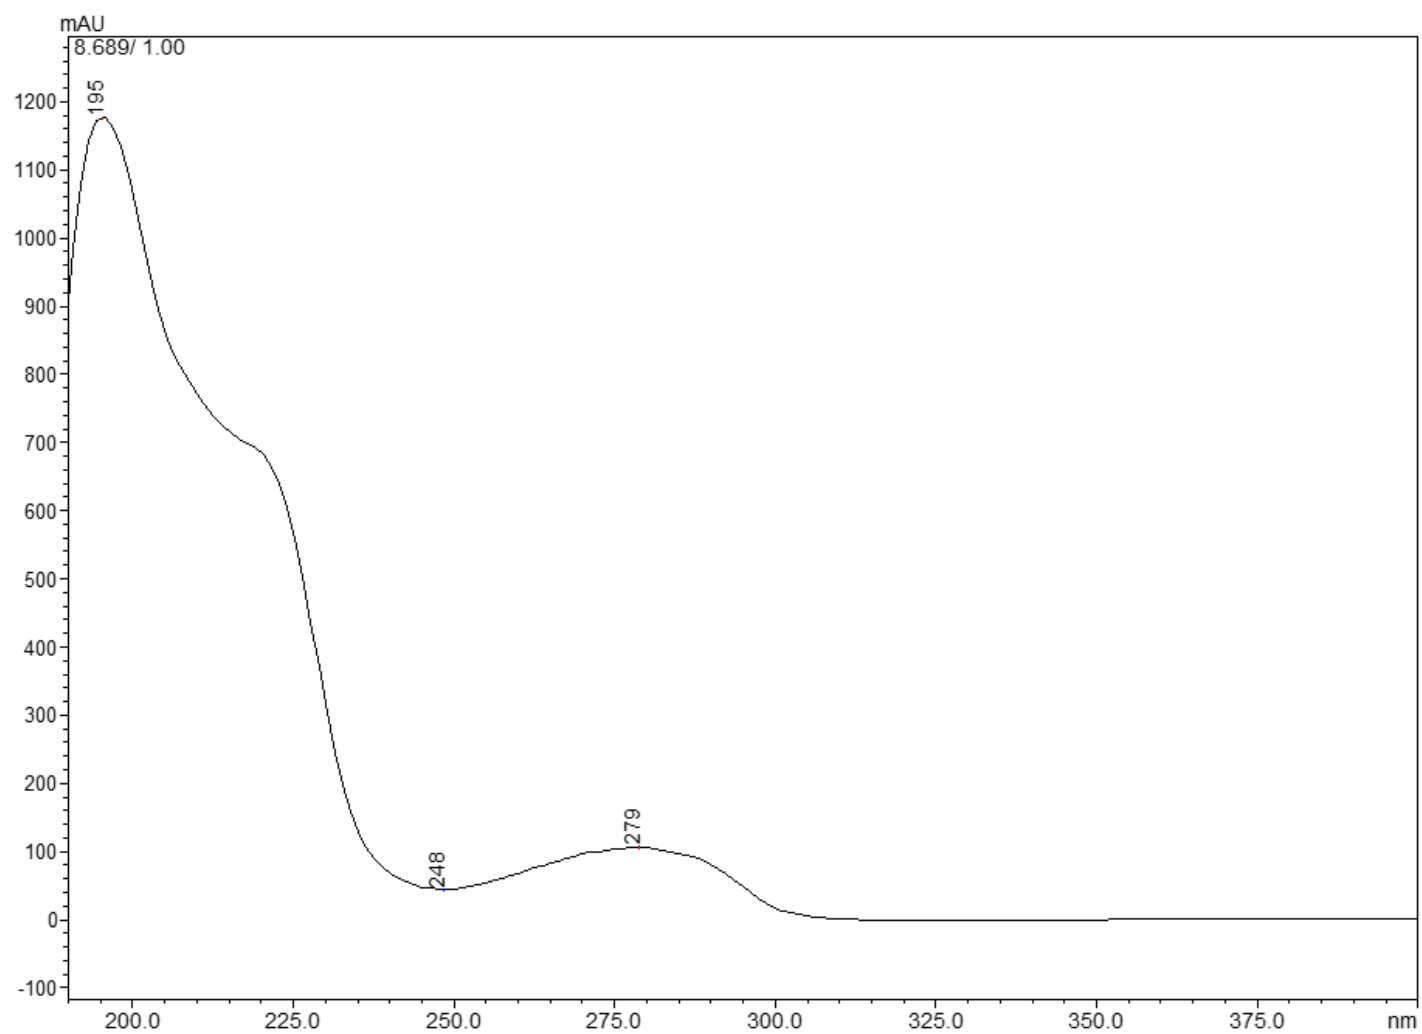

**Figure S16:** UV spectrum (photodiode array, H<sub>2</sub>O:MeCN) of **1**.

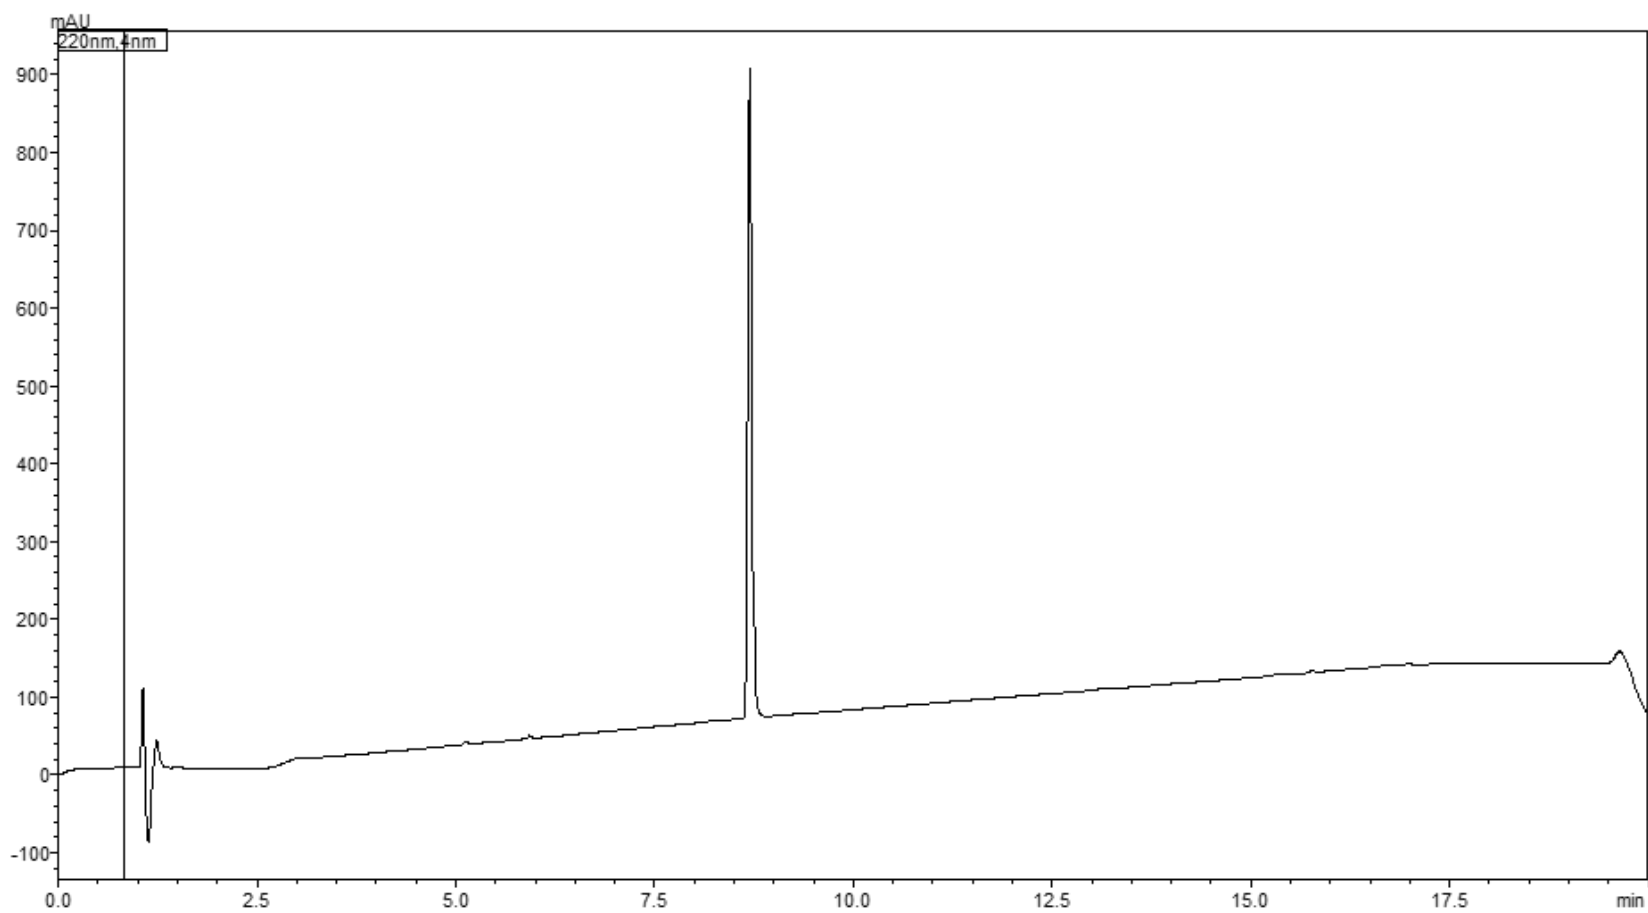

**Figure S17:** HPLC-PDA chromatogram of unguisin J (1).

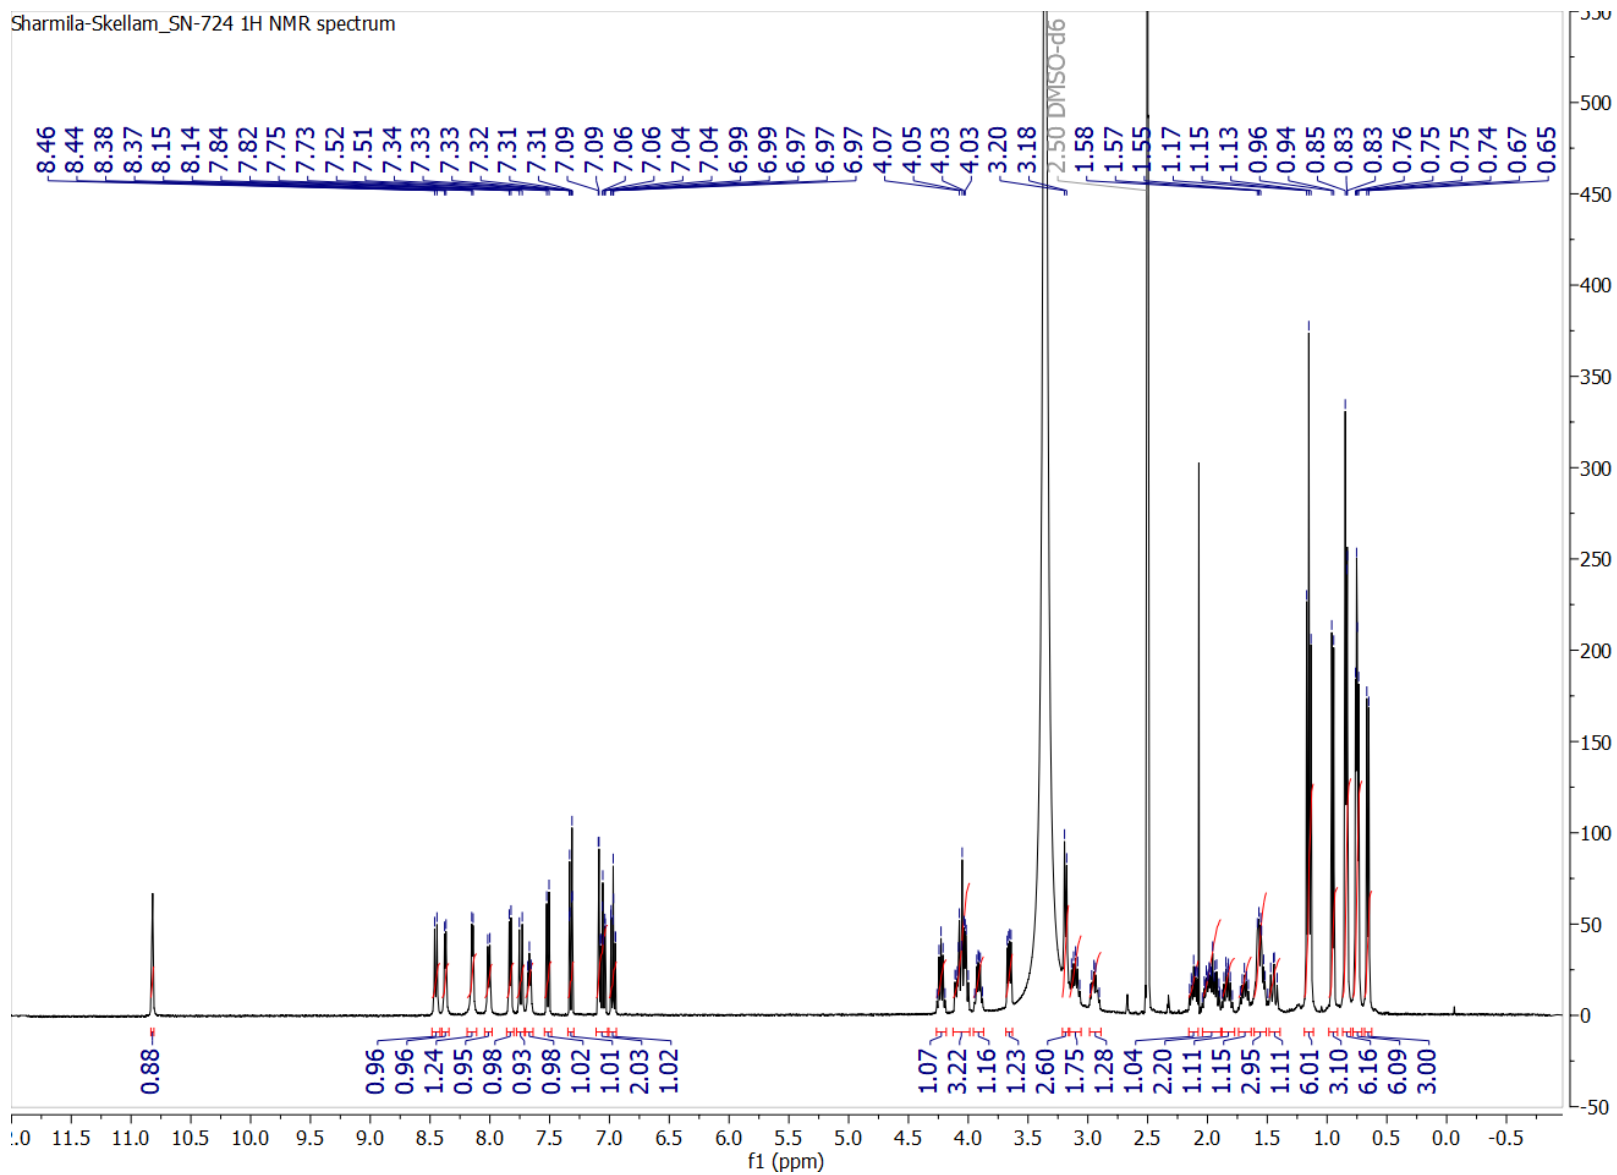

Figure S18: <sup>1</sup>H NMR spectrum of **2** (500 MHz, DMSO-*d*<sub>6</sub>).

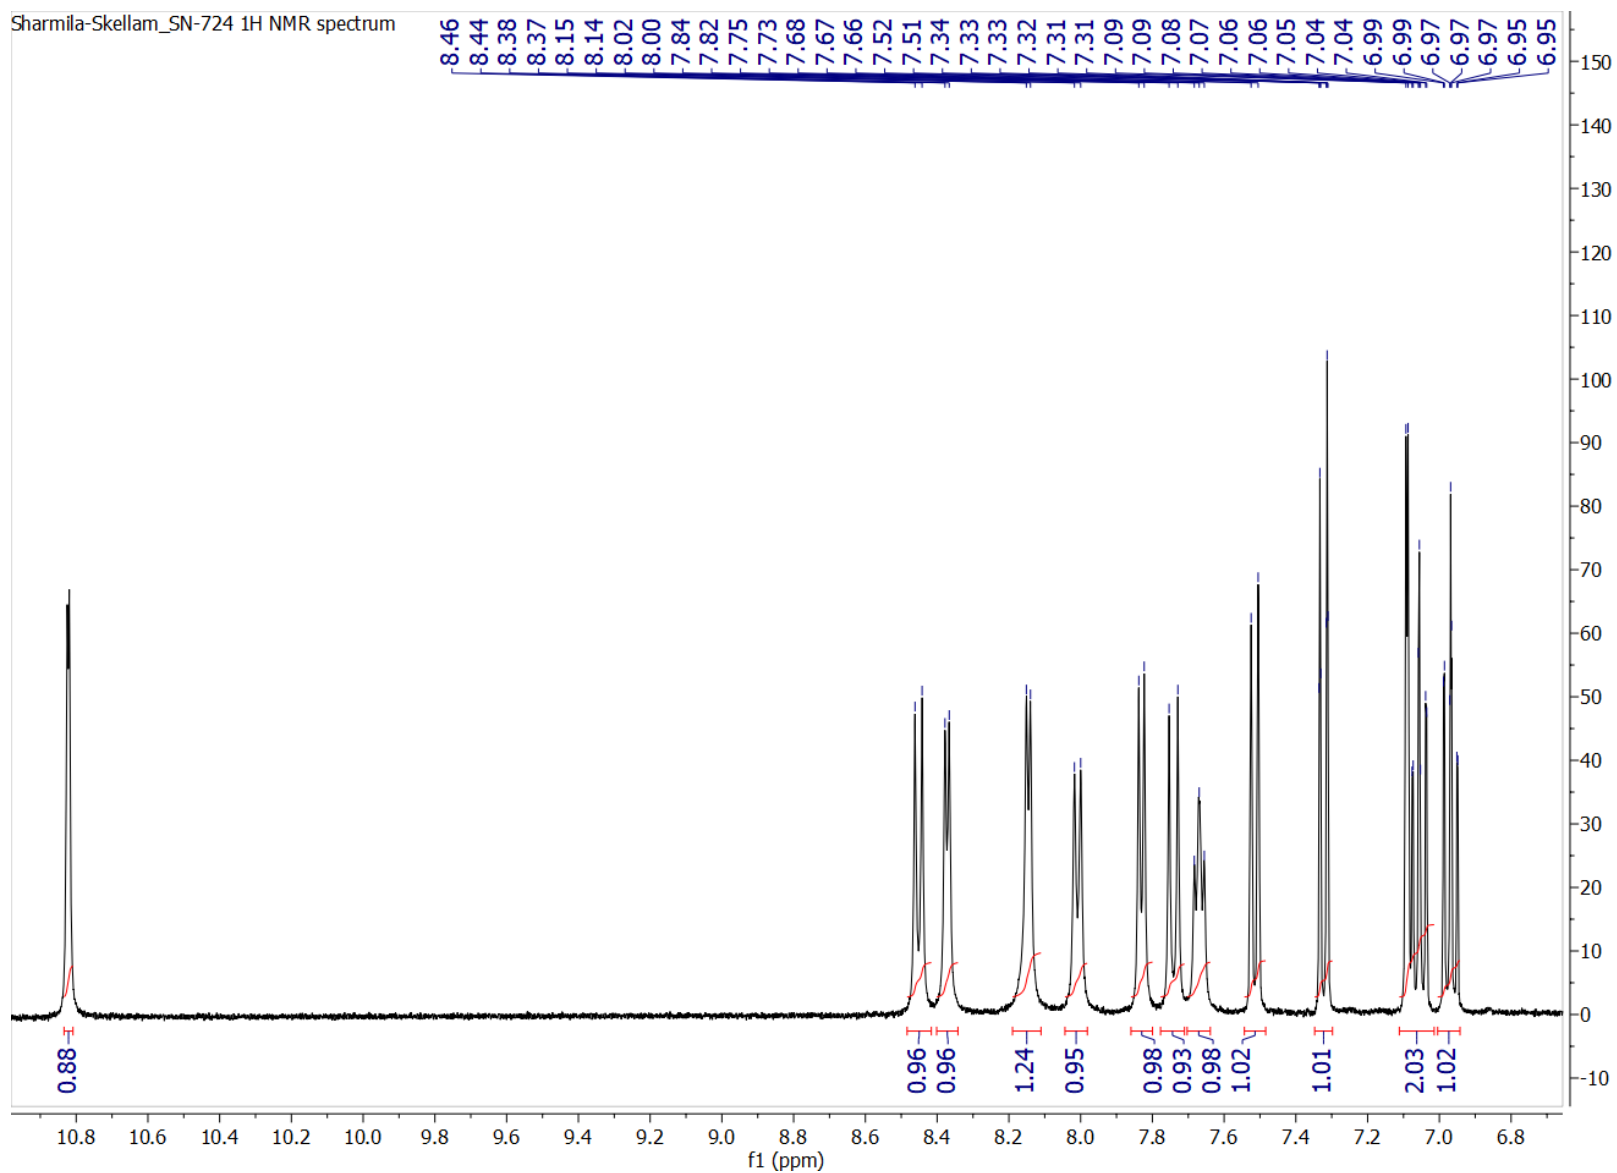

**Figure S19:** Expansion of the  $^1\text{H}$  NMR spectrum of **2** (500 MHz,  $\text{DMSO-}d_6$ ).

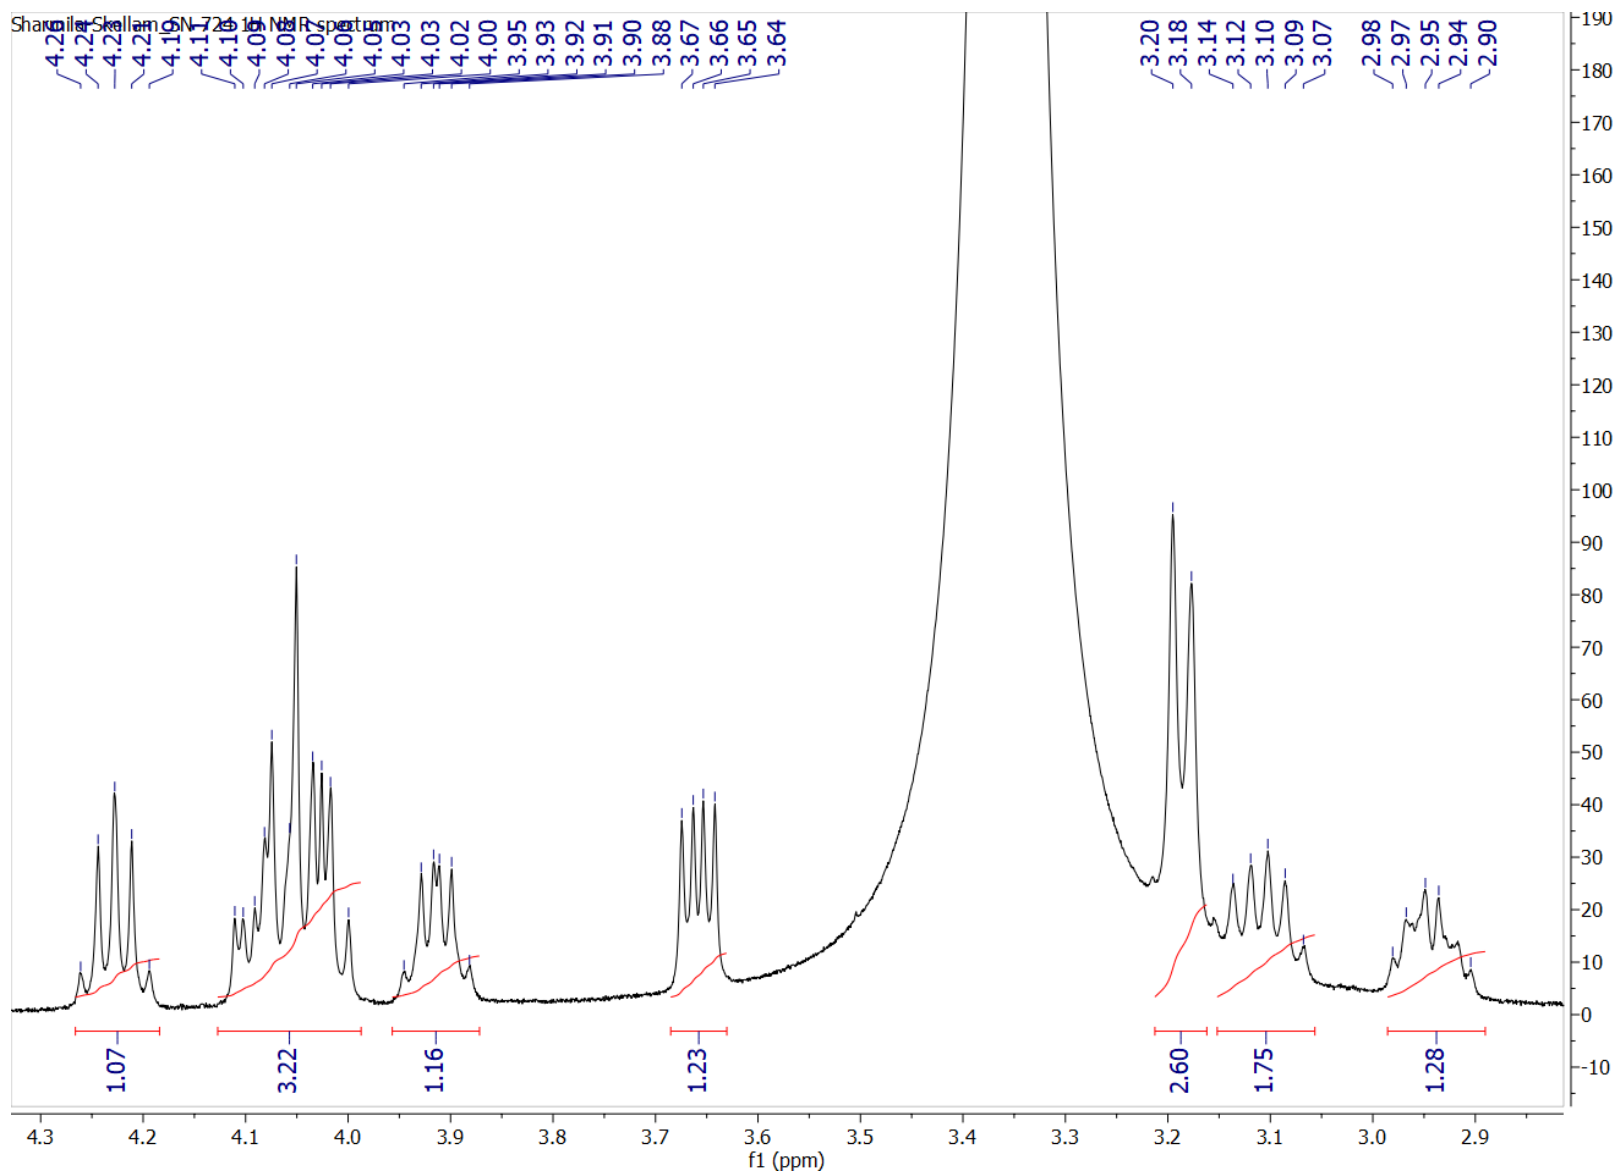

**Figure S20:** Expansion of the  $^1\text{H}$  NMR spectrum of **2** (500 MHz,  $\text{DMSO-}d_6$ ).

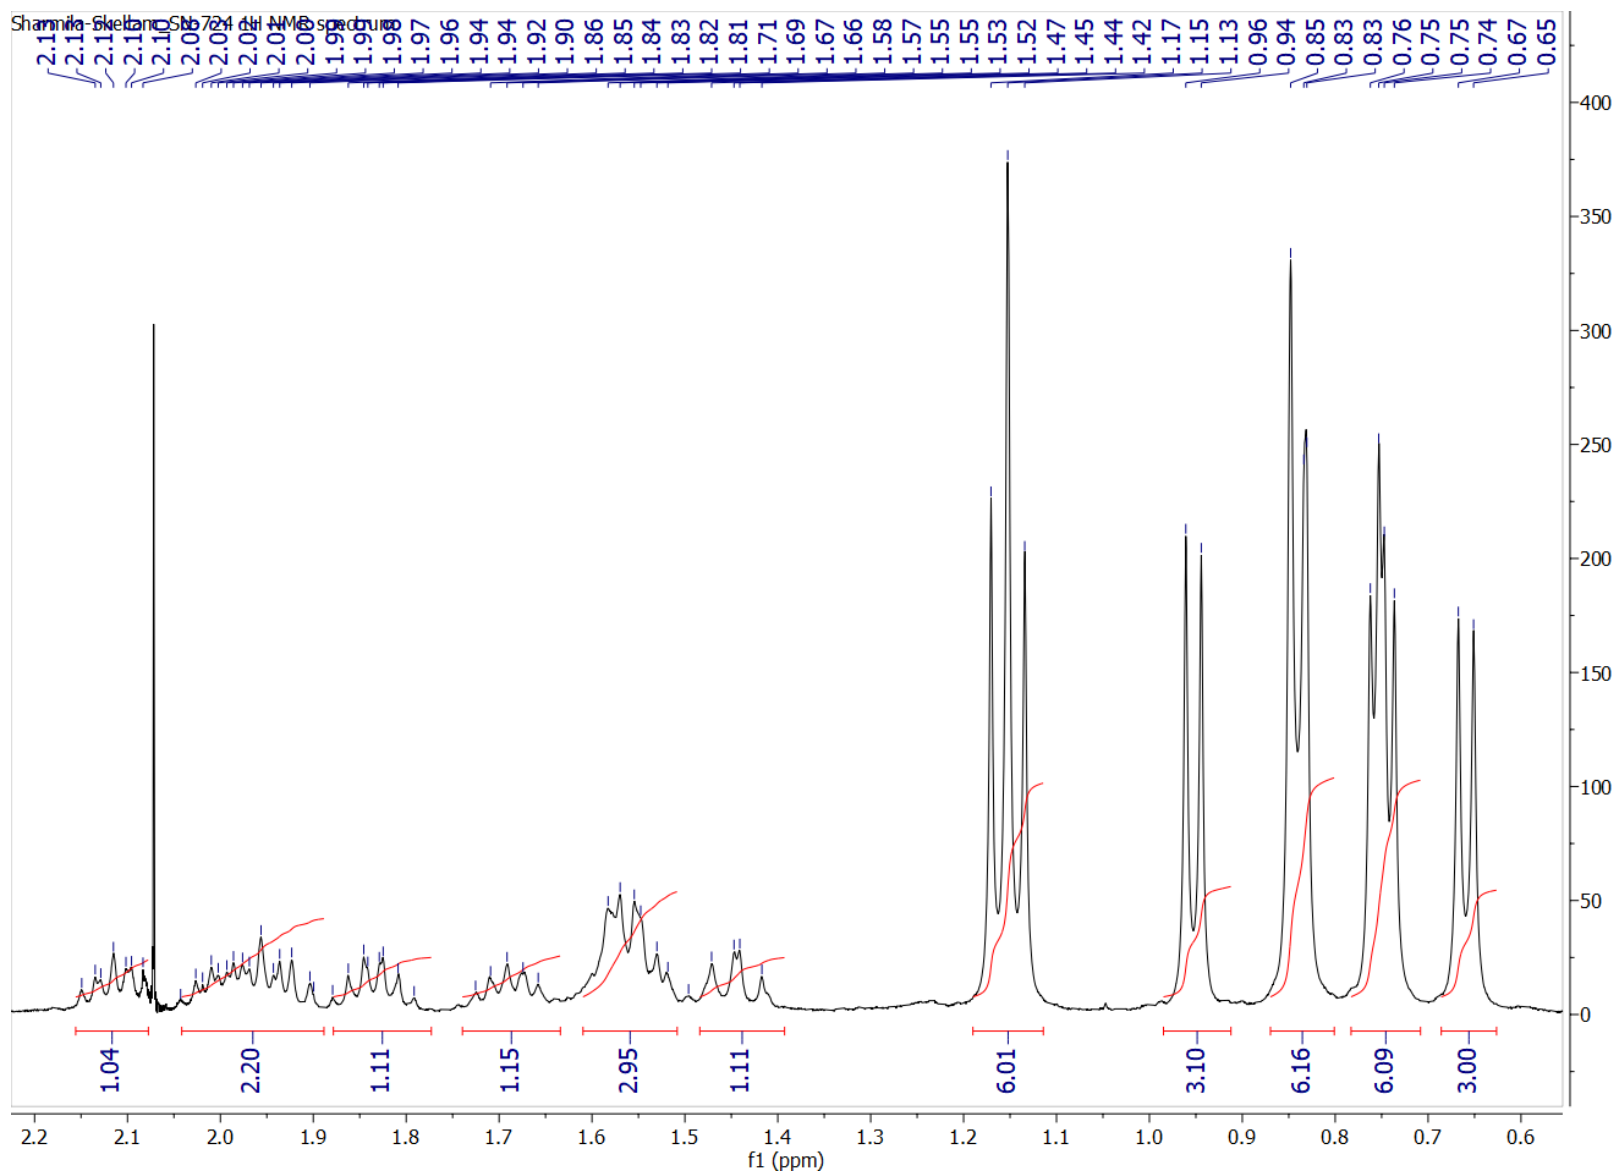

**Figure S21:** Expansion of the  $^1\text{H}$  NMR spectrum of **2** (500 MHz,  $\text{DMSO-}d_6$ ).



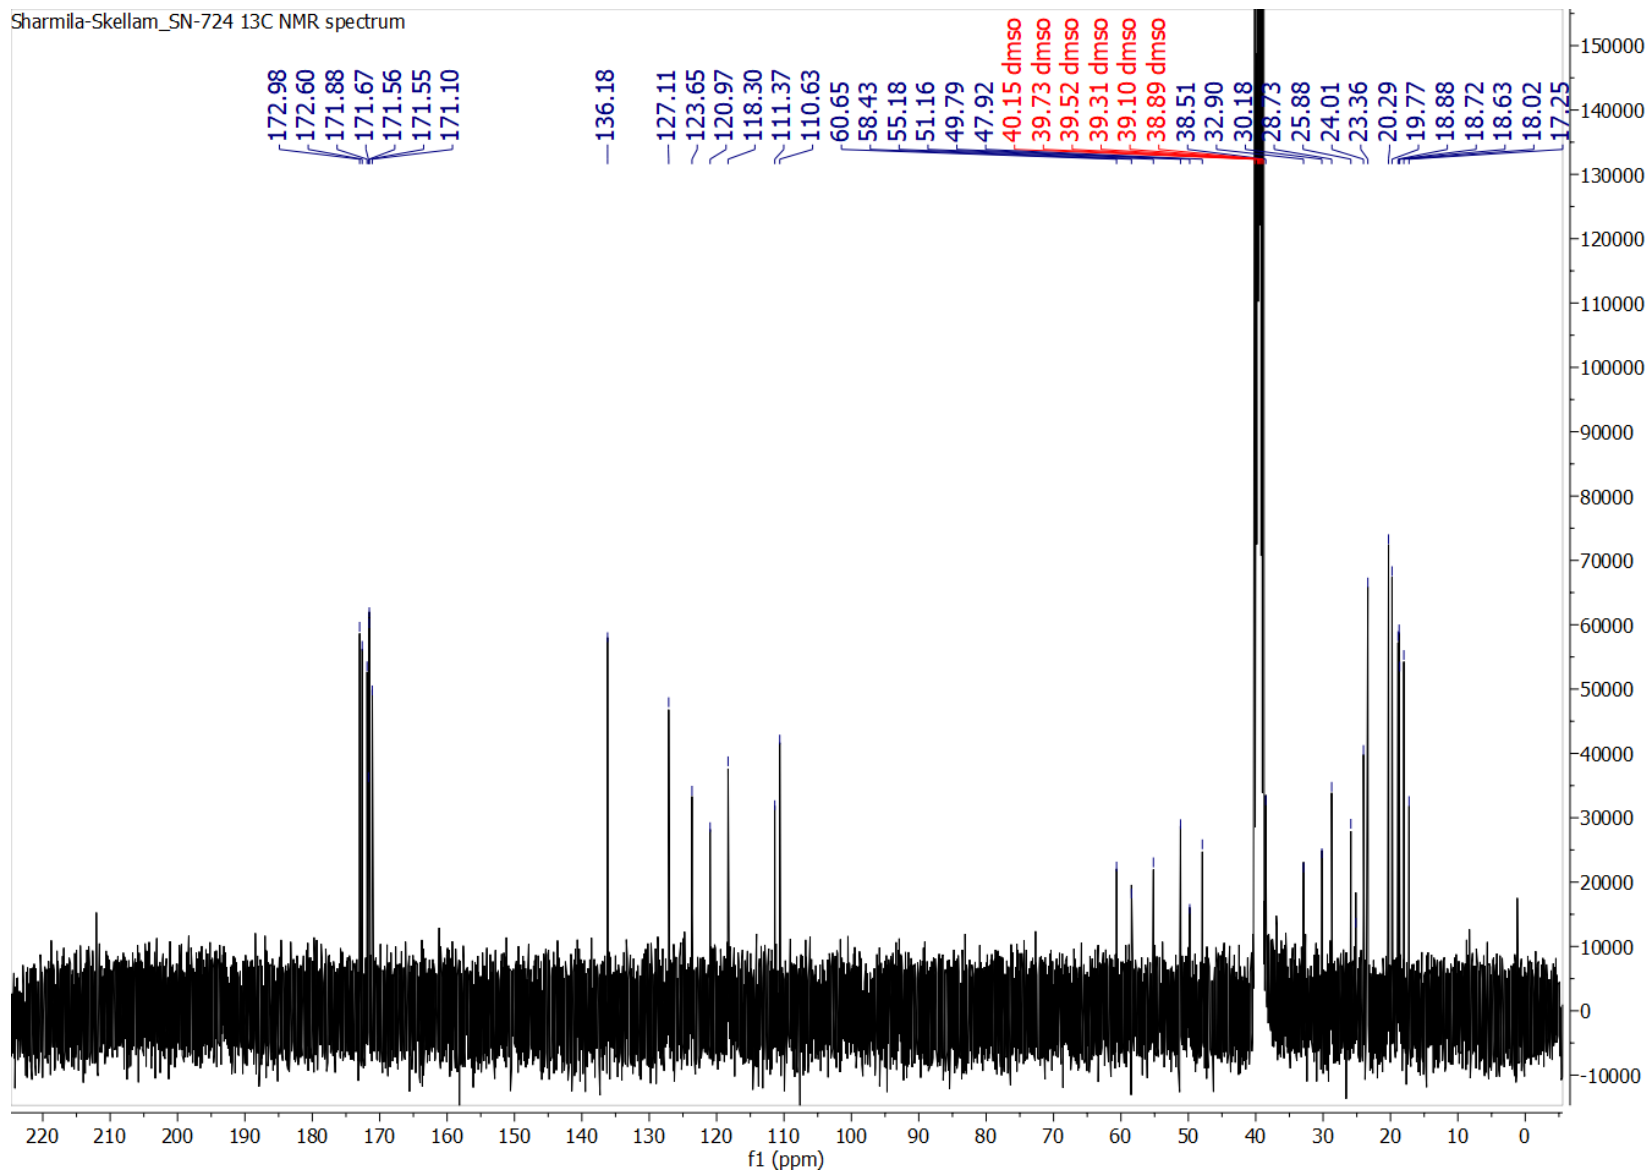

**Figure S22:**  $^{13}\text{C}$  NMR spectrum of **2** (125 MHz,  $\text{DMSO-}d_6$ ).

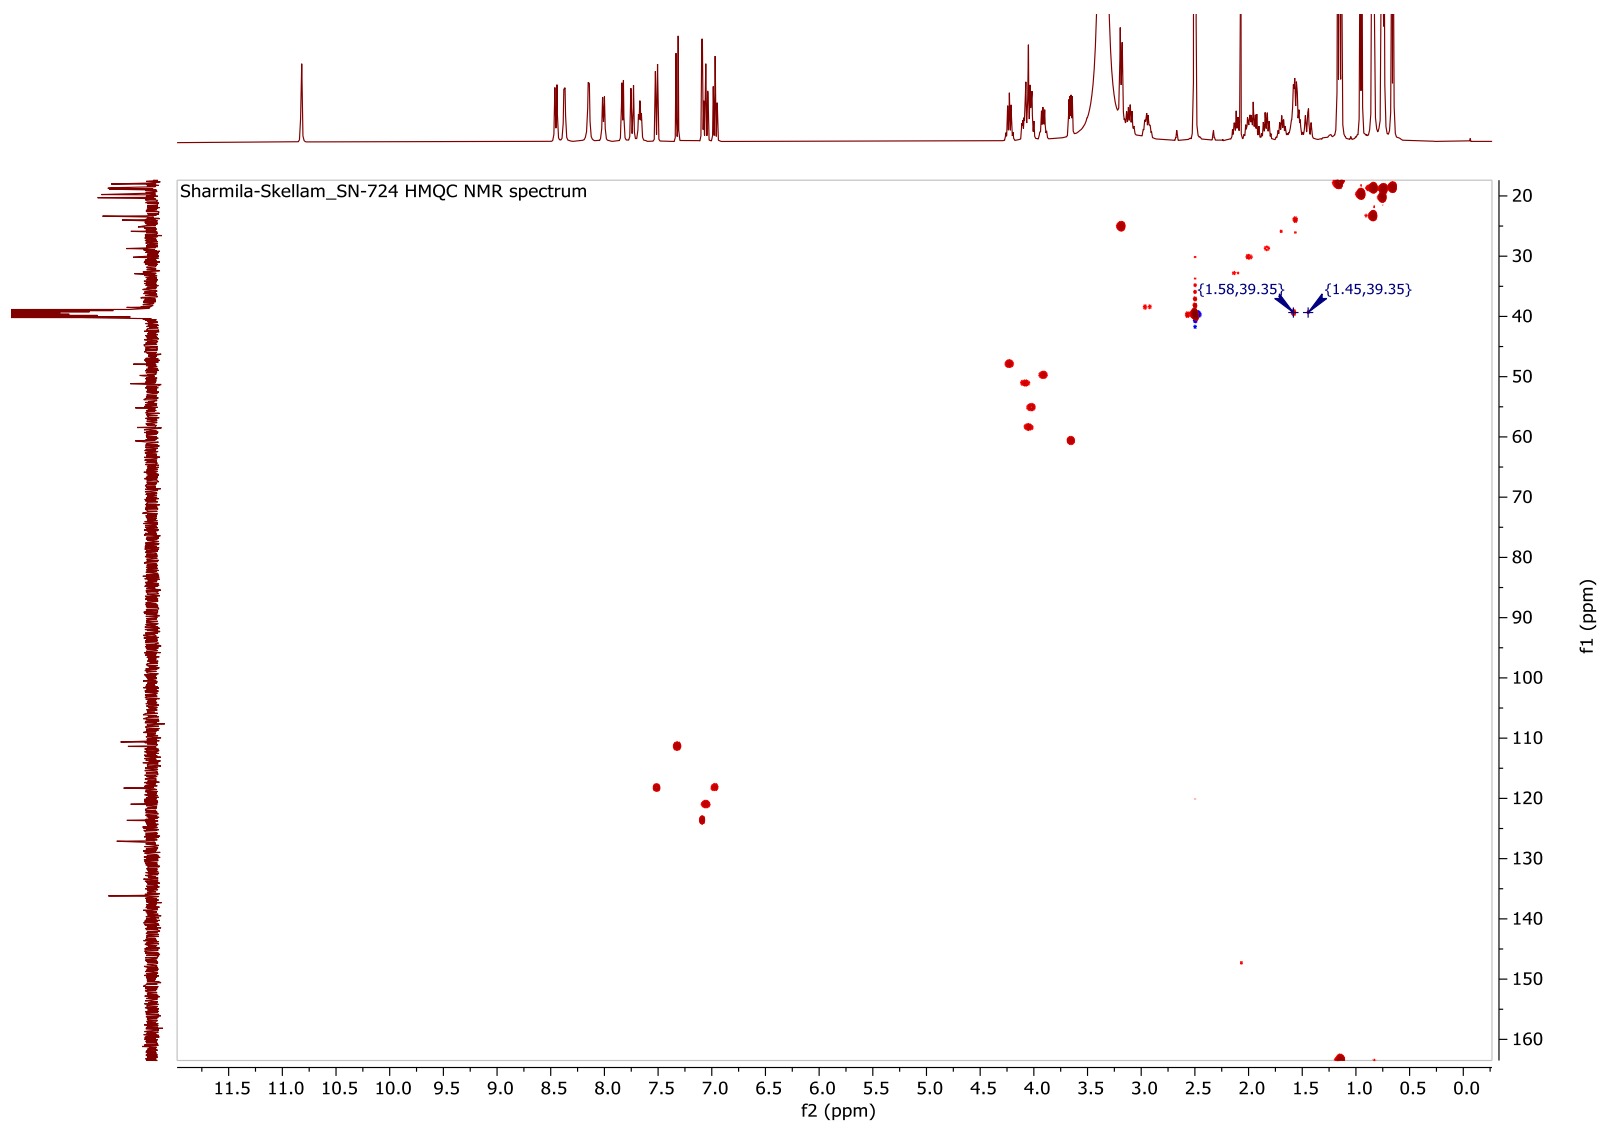

**Figure S23:** gHSQC NMR spectrum of **2** ( $^1\text{H}$ :500 MHz;  $^{13}\text{C}$ :125 MHz,  $\text{DMSO-}d_6$ ).

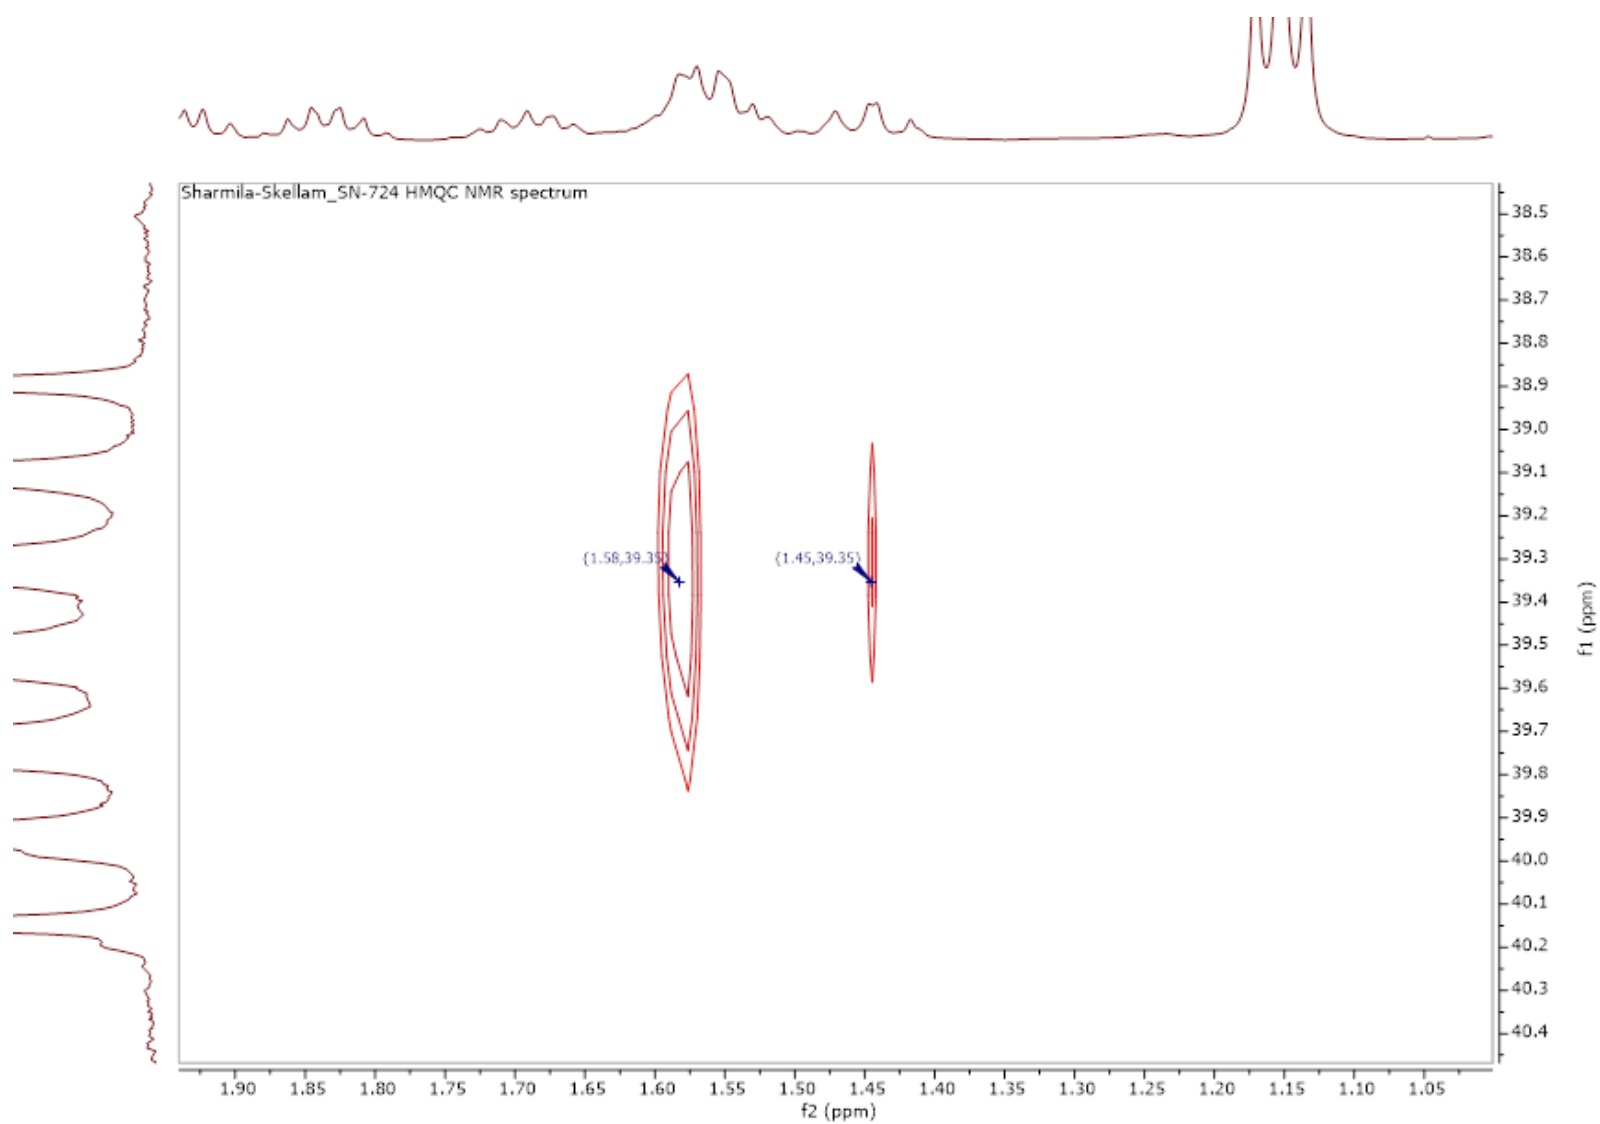

**Figure S24:** Expansion of the gHSQC NMR spectrum of **2** ( $^1\text{H}$ :500 MHz;  $^{13}\text{C}$ :125 MHz,  $\text{DMSO-}d_6$ ).

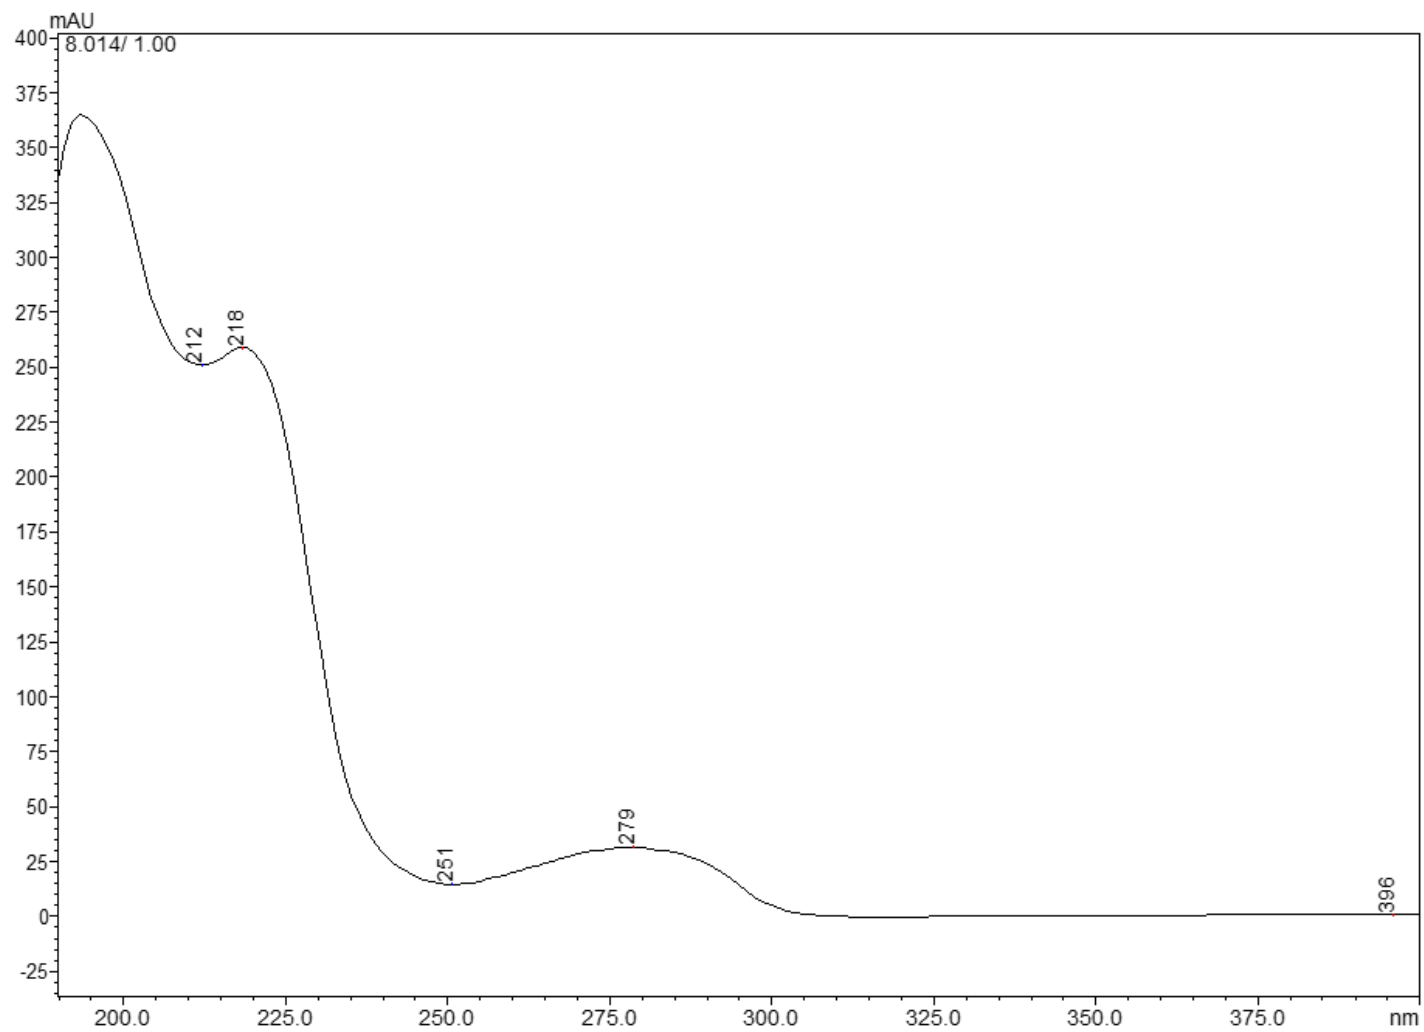

**Figure S25:** UV spectrum (photodiode array, H<sub>2</sub>O:MeCN) of **2**.

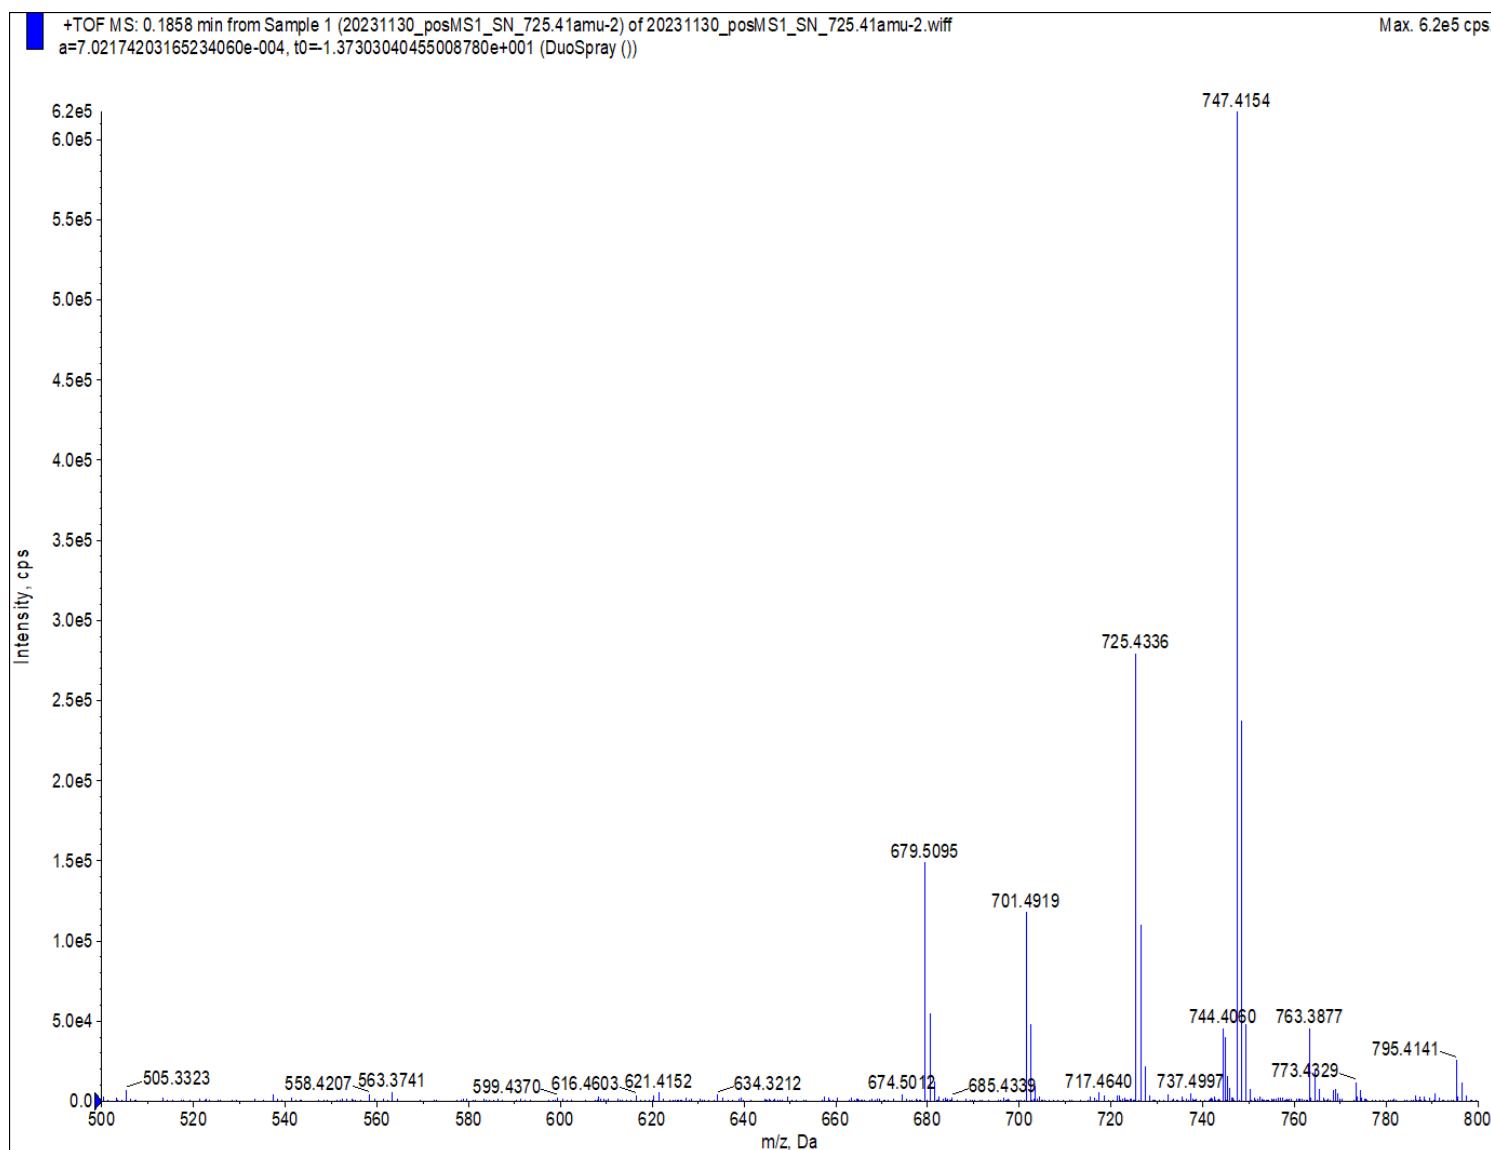

**Figure S26:** HRESIMS spectrum of **2** in positive ionization mode.

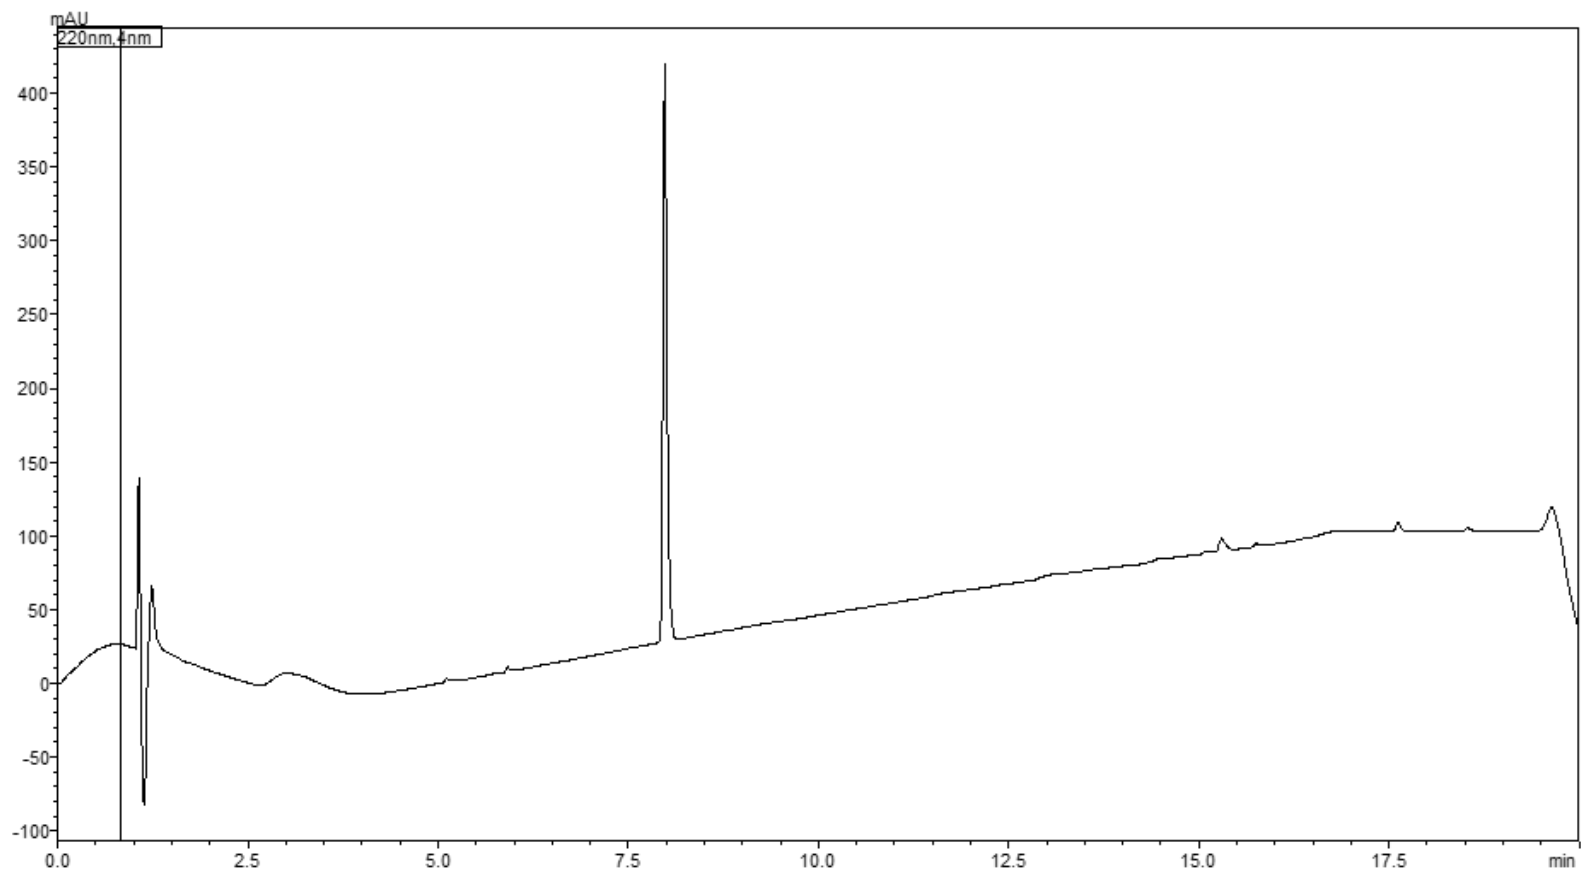

**Figure S27:** HPLC-PDA chromatogram of unguisin B (2).

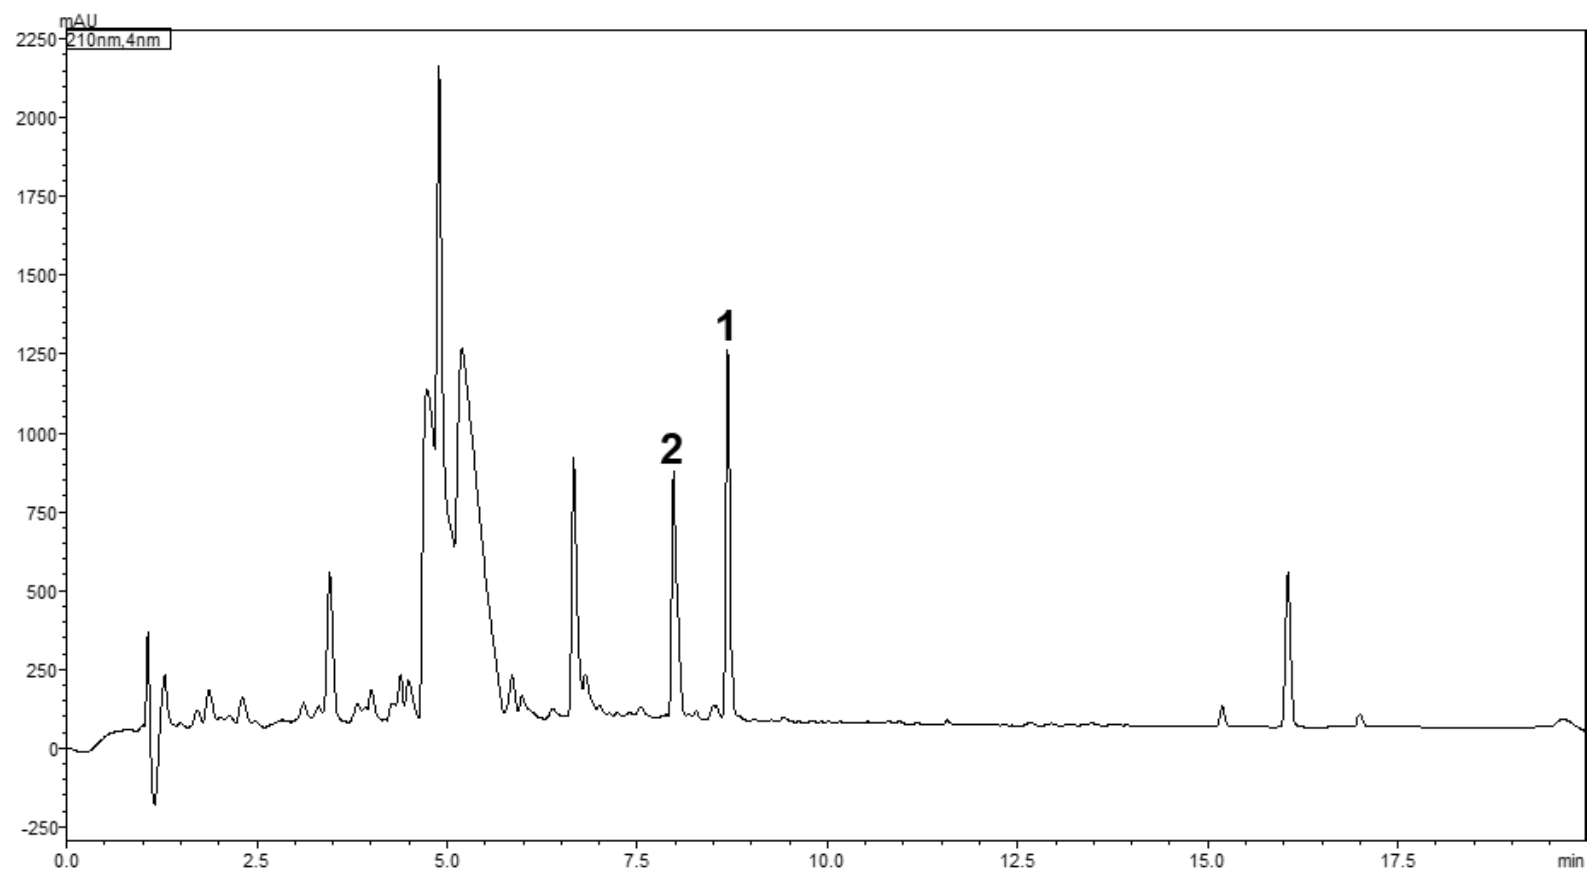

**Figure S28:** HPLC-PDA chromatogram of soluble-organic extract from rice culture of *A. heteromorphus*. Peak labels represent Unguisin J (1) and Unguisin B (2).

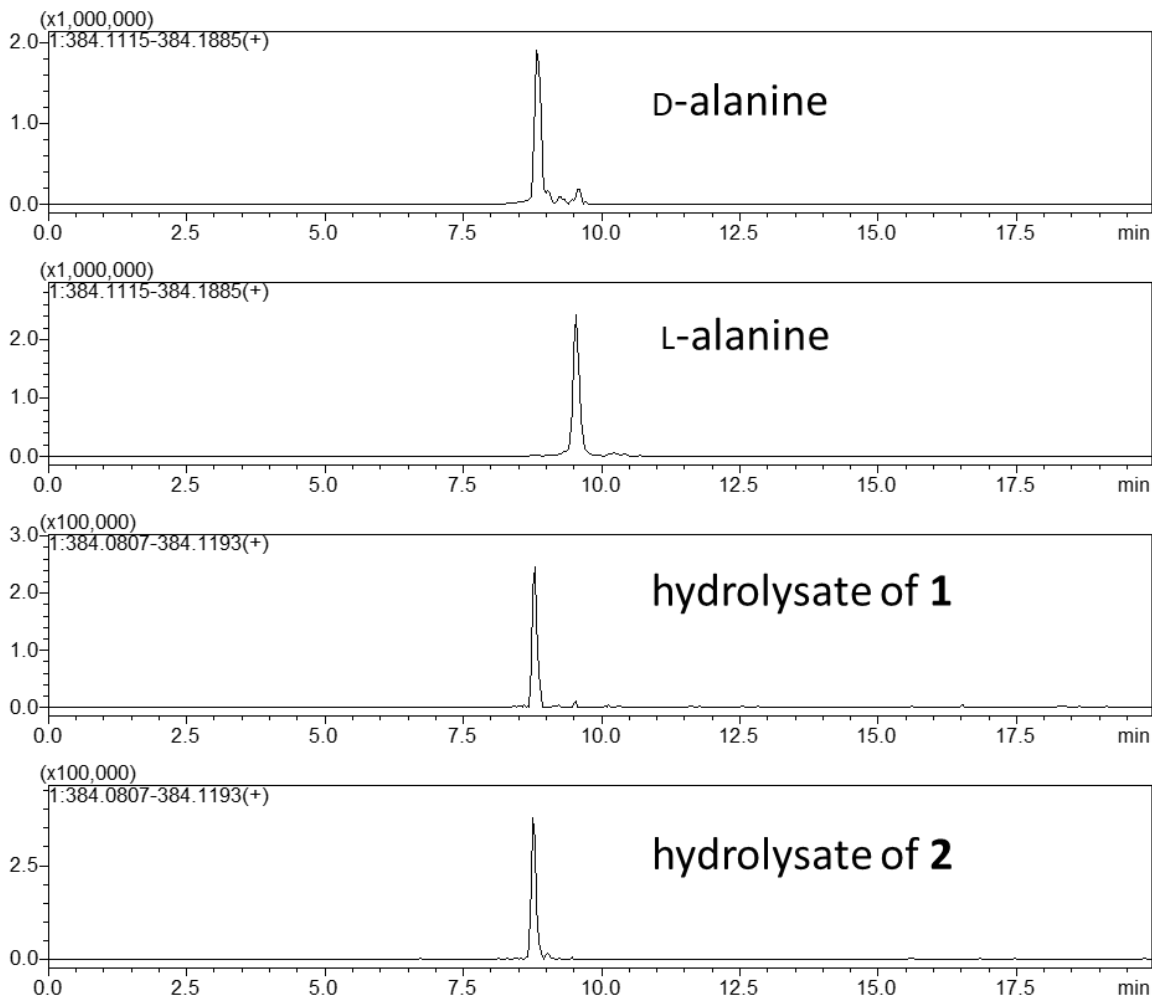

**Figure S29:** LC-MS analysis of  $N^{\alpha}$ -(5-fluoro-2,4-dinitrophenyl)-D-leucinamide derivatives of the hydrolysates of **1** and **2** as well as the alanine amino acid standards.



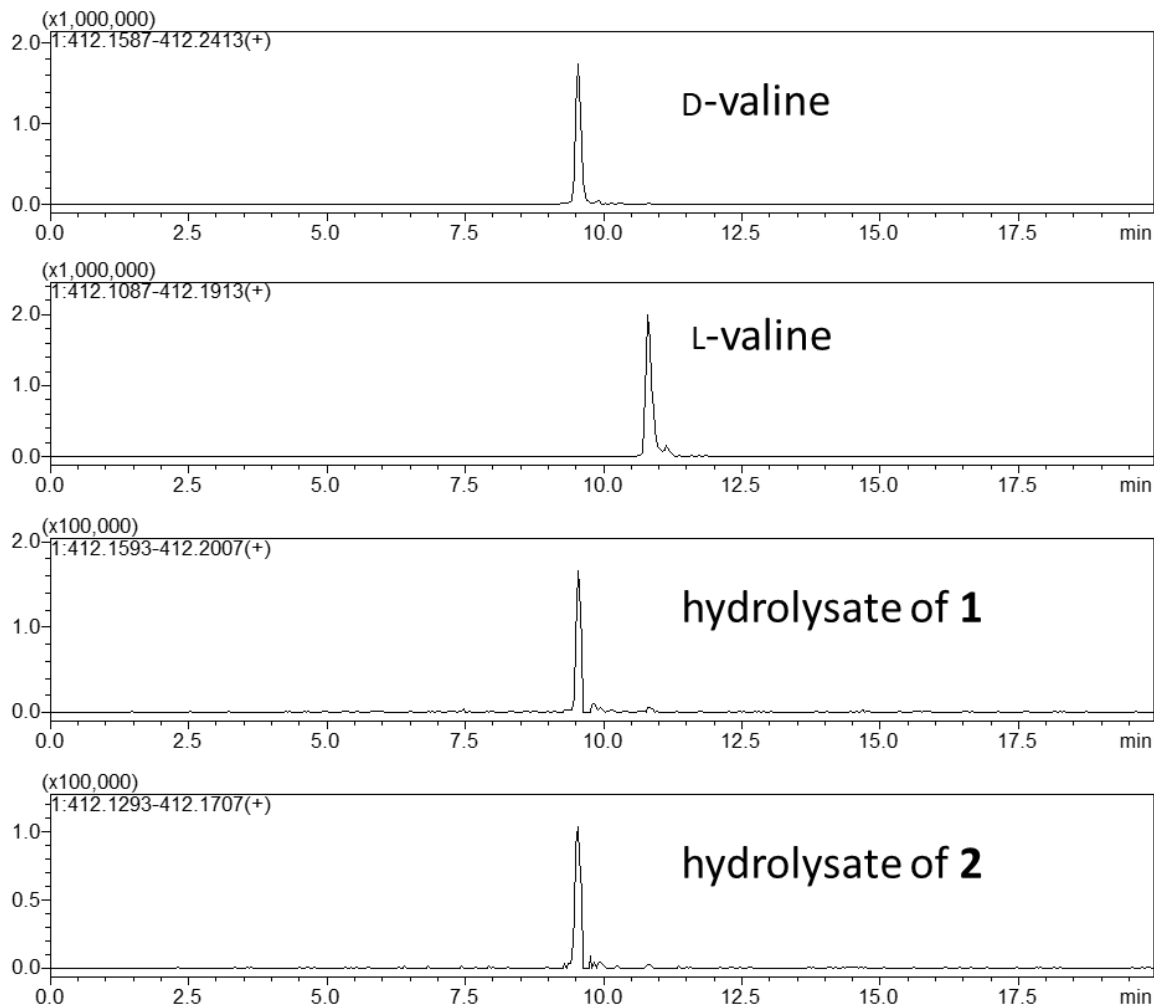

**Figure S30:** LC-MS analysis of  $N^\alpha$ -(5-fluoro-2,4-dinitrophenyl)-D-leucinamide derivatives of the hydrolysates of **1** and **2** as well as the valine amino acid standards.

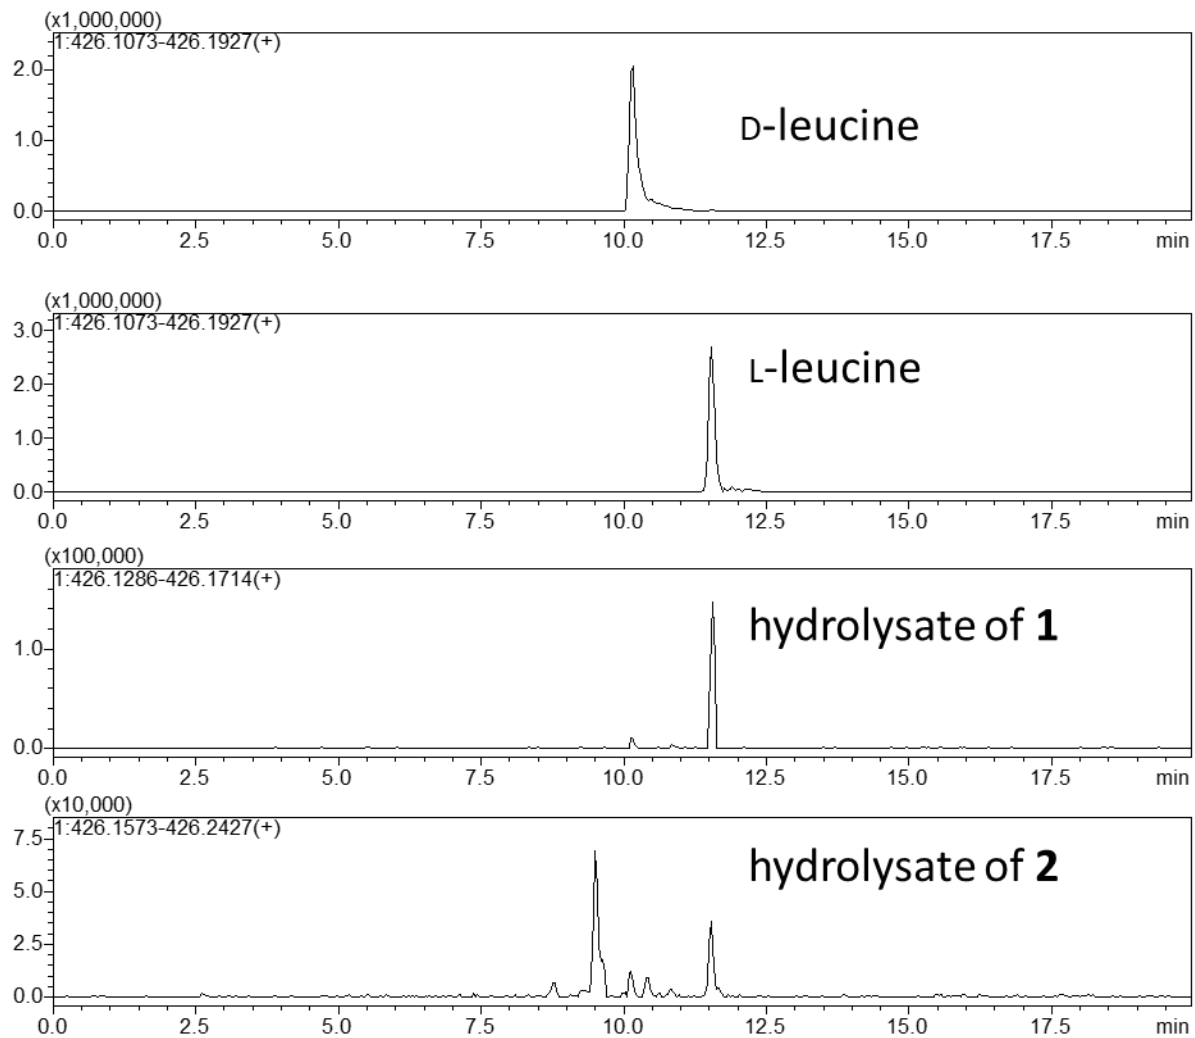

**Figure S31:** LC-MS analysis of  $N^\alpha$ -(5-fluoro-2,4-dinitrophenyl)-D-leucinamide derivatives of the hydrolysates of **1** and **2** as well as the leucine amino acid standards.

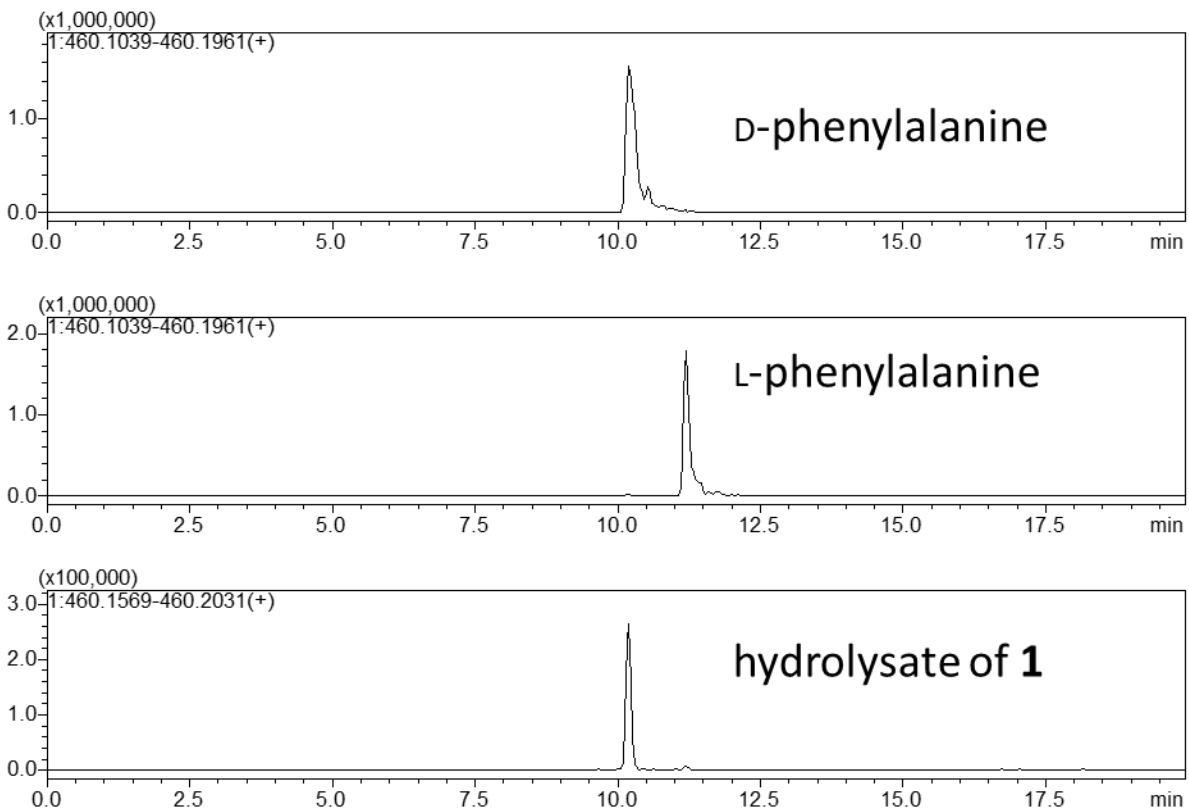

**Figure S32:** LC-MS analysis of  $N^{\alpha}$ -(5-fluoro-2,4-dinitrophenyl)-D-leucinamide derivative of the hydrolysate of **1** as well as the phenylalanine amino acid standards.

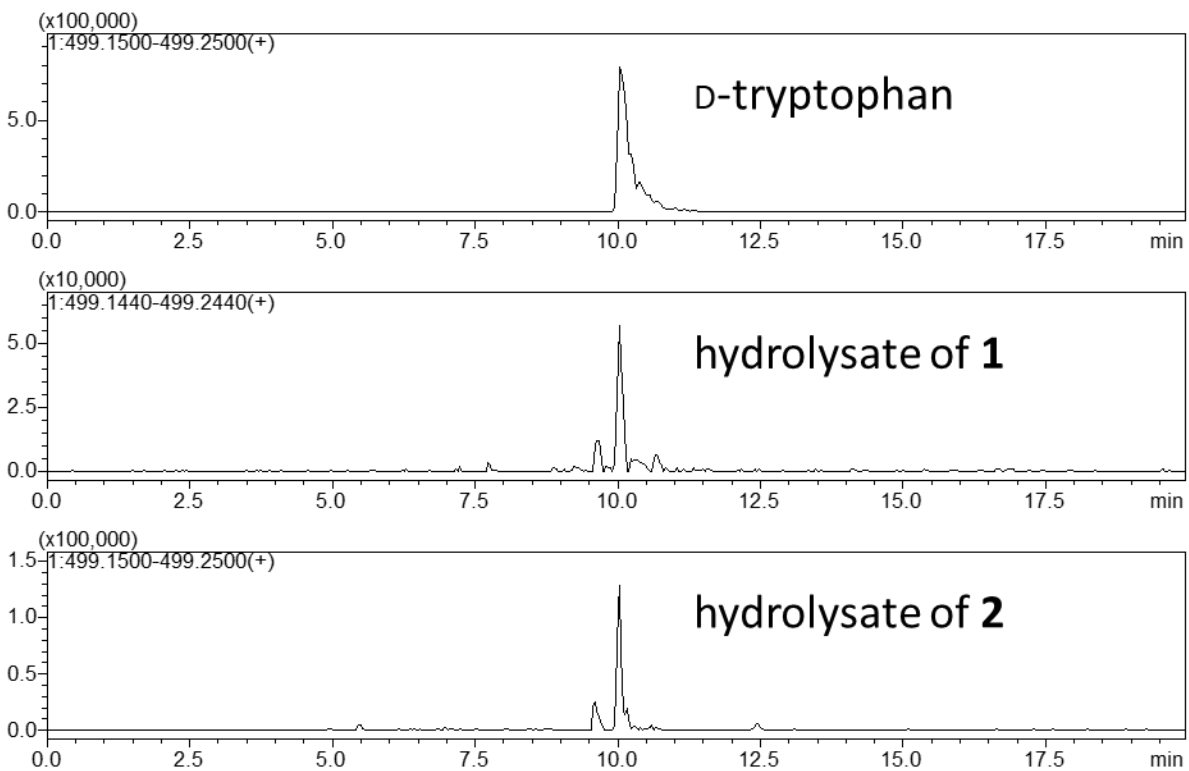

**Figure S33:** LC-MS analysis of  $N^\alpha$ -(5-fluoro-2,4-dinitrophenyl)-D-leucinamide derivatives of the hydrolysates of **1** and **2** as well as the D-tryptophan standard.

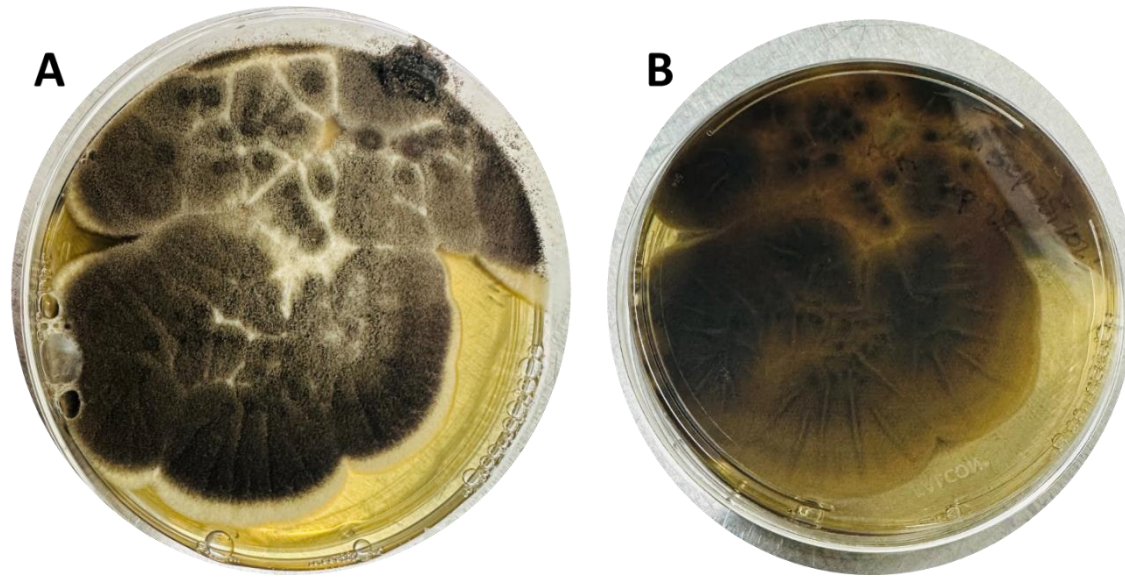

**Figure S34:** Colonies of *Aspergillus heteromorphous* CBS 117.55 with 7 days of growth at 25 °C. Colonies on DPY agar plate verse (A) and obverse (B).

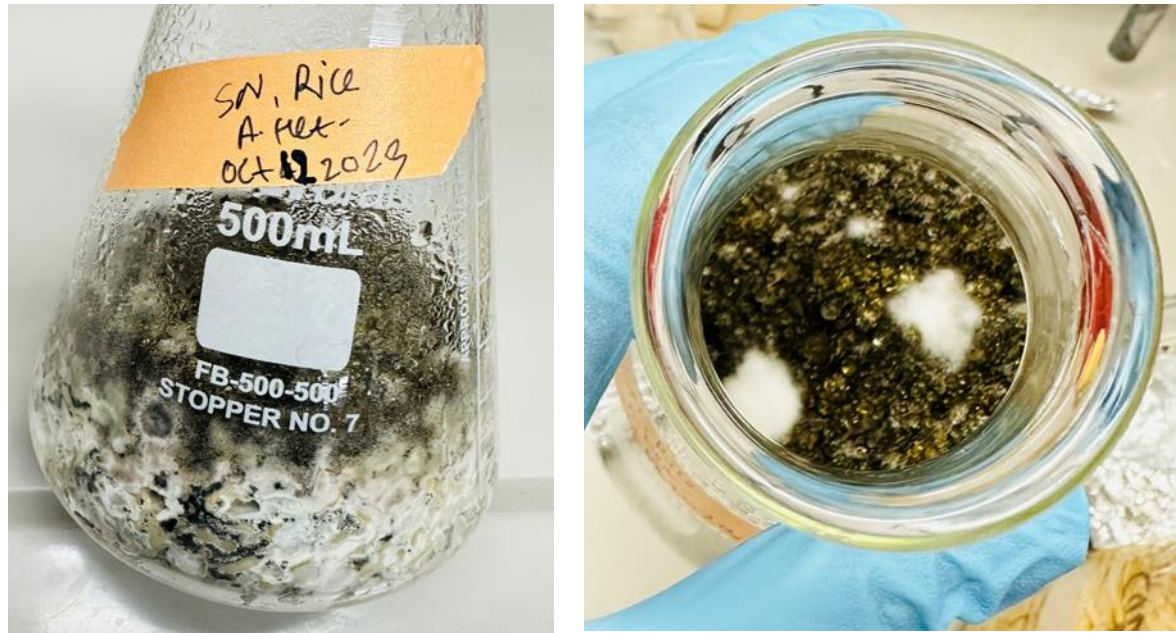

**Figure S35:** Colonies of *Aspergillus heteromorphous* CBS 117.55 with 21 days of growth at 25 °C on solid rice in Erlenmeyer flasks.

**Table S2:** <sup>1</sup>H and <sup>13</sup>C NMR data for **2** (<sup>1</sup>H: 500MHz, <sup>13</sup>C:125MHz; DMSO-*d*<sub>6</sub>).

|                         |         | <b>2</b>             |                                       | <b>Unguisin B (Malmstron, 1999)</b> |                                       |
|-------------------------|---------|----------------------|---------------------------------------|-------------------------------------|---------------------------------------|
| <b>residue/position</b> |         | <b>δ<sub>C</sub></b> | <b>δ<sub>H</sub> (mult., J in Hz)</b> | <b>δ<sub>C</sub></b>                | <b>δ<sub>H</sub> (mult., J in Hz)</b> |
| Alanine                 | NH      | -                    | 8.37 (d, 4.9)                         | -                                   | 8.36 (d, 4.6)                         |
|                         | Cα      | 49.8                 | 3.91 (m)                              | 49.8                                | 3.92 (m)                              |
|                         | Cβ      | 17.3                 | 1.14 (d, 7.1)                         | 17.3                                | 1.16                                  |
| Alanine                 | NH      | -                    | 7.83 (d, 6.2)                         | -                                   | 7.82 (d, 6.1)                         |
|                         | Cα      | 47.9                 | 4.22 m                                | 48.0                                | 4.23 (m)                              |
|                         | Cβ      | 18.0                 | 1.16 (d, 7.1)                         | 18.1                                | 1.16                                  |
| Valine                  | NH      | -                    | 8.14 (d, 4.5)                         | -                                   | 8.13 (d, 4.4)                         |
|                         | Cα      | 60.6                 | 3.66 (dd, 8.4, 4.4)                   | 60.6                                | 3.67 (dd, 4.6, 8.2)                   |
|                         | Cβ      | 28.7                 | 1.83 (m)                              | 28.8                                | 1.82 (m)                              |
|                         | Cγ      | 19.8                 | 0.95 (d, 6.7)                         | 19.7                                | 0.95 (d, 6.6)                         |
|                         | Cγ      | 18.7                 | 0.84 (d, 6.4)                         | 18.8                                | 0.84 (d, 6.4)                         |
| Valine                  | NH      | -                    | 7.74 (d, 9.8)                         | -                                   | 7.73 (d, 9.7)                         |
|                         | Cα      | 58.4                 | 4.05 (m)                              | 58.5                                | 4.07 (m)                              |
|                         | Cβ      | 30.2                 | 2.00 (m)                              | 30.2                                | 2.00 (m)                              |
|                         | Cγ      | 18.6                 | 0.66 (d, 6.6)                         | 18.6                                | 0.66 (d, 6.6)                         |
|                         | Cγ      | 18.9                 | 0.74 (d, 6.6)                         | 18.9                                | 0.74                                  |
| GABA                    | NH      | -                    | 7.67 (t, 5.5)                         | -                                   | 7.65 (t, 5.3)                         |
|                         | Cα      | 38.5                 | 3.11 (m), 2.94 (m)                    | 38.5                                | 3.11 (m), 2.95 (m)                    |
|                         | Cβ      | 25.9                 | 1.69 (m), 1.55 (m)                    | 25.9                                | 1.65 (m), 1.58 (m)                    |
|                         | Cγ      | 32.9                 | 2.11 (m), 1.95 (m)                    | 32.9                                | 2.11 (m), 1.94 (m)                    |
| Tryptophan              | NH      | -                    | 8.0 (d, 7.1)                          | -                                   | 7.98 (d, 6.8)                         |
|                         | Cα      | 55.2                 | 4.02 (m)                              | 55.2                                | 4.05 (m)                              |
|                         | Cβ      | 25.2                 | 3.18 (d, 7.2)                         | 25.2                                | 3.20 (d, 8.5)                         |
|                         | NH      | -                    | 10.82 (d, 2.4)                        | -                                   | 10.81 (d, 2.0)                        |
|                         | C-2     | 123.7                | 7.08 (d, 2.3)                         | 123.6                               | 7.11 (d, 2.2)                         |
|                         | C-3     | 110.6                | -                                     | 110.6                               | -                                     |
|                         | C3a     | 127.1                | -                                     | 127.1                               | -                                     |
|                         | C-4     | 118.3                | 7.51 (d, 7.9)                         | 118.3                               | 7.54 (d, 7.9)                         |
|                         | C-5     | 121.0                | 7.06 (ddd, 7.9, 7.1, 1.1)             | 121.0                               | 7.08 (t, 6.9)                         |
|                         | C-6     | 118.3                | 6.97 (ddd, 8.1, 7.1, 1.1)             | 118.3                               | 6.97 (t, 7.2)                         |
|                         | C-7     | 111.4                | 7.32 (dt, 8.1, 0.8)                   | 111.4                               | 7.35 (d 8.1)                          |
|                         | C-7a    | 136.2                | -                                     | 136.2                               | -                                     |
|                         | Leucine | NH                   | -                                     | 8.45 (d, 7.9)                       | -                                     |
| Cα                      |         | 51.2                 | 4.07 (m)                              | 51.2                                | 4.09 (m)                              |
| Cβ                      |         | 39.4 <sup>a</sup>    | 1.58 (m), 1.45 (m)                    | 38.7                                | 1.58 (m)                              |
| Cγ                      |         | 24.0                 | 1.57 (m)                              | 24.1                                | 1.58 (m)                              |
| Cδ                      |         | 23.4                 | 0.84 (d, 6.4)                         | 23.4                                | 0.84 (d, 6.4)                         |
| Cδ                      |         | 20.3                 | 0.75 (d, 6.0)                         | 20.4                                | 0.74                                  |

<sup>a</sup>Confirmed by HSQC. Carbons signals at δ<sub>C</sub> 171.1, 171.6, 171.6, 171.7, 171.9, 172.6 and 173.0 ppm.

**Table S3:** Summary of additional NRPS identified in the genome of *A. heteromorphus* CBS 117.55. Abbreviations as in main text; R = reductase.

| fungiSMASH contig ID | NCBI GeneID | Putative NRPS size (aa) | Putative domain arrangement                                                  |
|----------------------|-------------|-------------------------|------------------------------------------------------------------------------|
| 2.2                  | 37069286    | 4028                    | C <sub>T</sub> -A-PCP-C-A-MT-PCP-C-A-PCP-TE                                  |
| 35.2                 | 37070309    | 5593                    | A-PCP-C-A-E-PCP-C-A-E-PCP-A-C-PCP-C-PCP                                      |
| 57.3                 | 37069398    | 1436                    | C-A-PCP-R                                                                    |
| 119.1                | 37067680    | 5115                    | A-PCP-A-PCP-C-A-PCP-C-A-PCP-C-A-PCP                                          |
| 139.1                | 37063074    | 2302                    | A-PCP-C-A-PCP-R                                                              |
| 143.1                | 37069176    | 2452                    | A-PCP-C-A-PCP-C <sub>T</sub>                                                 |
| 150.1                | 37069727    | 9562                    | A-PCP-C-A-PCP-E-C-A-PCP-C-A-PCP-E-C-A-PCP-E-C-A-PCP-E-C-A-PCP-C <sub>T</sub> |
| 161.1                | 37069763    | 2775                    | A-PCP-C-A-PCP-E (truncated; close to scaffold edge)                          |
| 172.1                | 37061517    | 671                     | A-PCP (truncated; close to scaffold edge)                                    |
| 172.2                | 37067500    | 4765                    | A-PCP-C-A-PCP-C-A-PCP-E-A-PCP-C (truncated; close to scaffold edge)          |
| 172.5                | 37069805    | 1931                    | A-PCP-C-A-PCP (truncated; close to scaffold edge)                            |
